# Supplementary material for: It’s a Long Way to the Tap: Microbiome and DNA-Based Omics at the Core of Drinking Water Quality
Source: MDPI journal article supplement (doi:10.3390/ijerph19137940), 2022-06-28
Supplement: s1 [file s1]

## It's a long way to the tap: microbiome and DNA-based omics at the core of drinking water quality

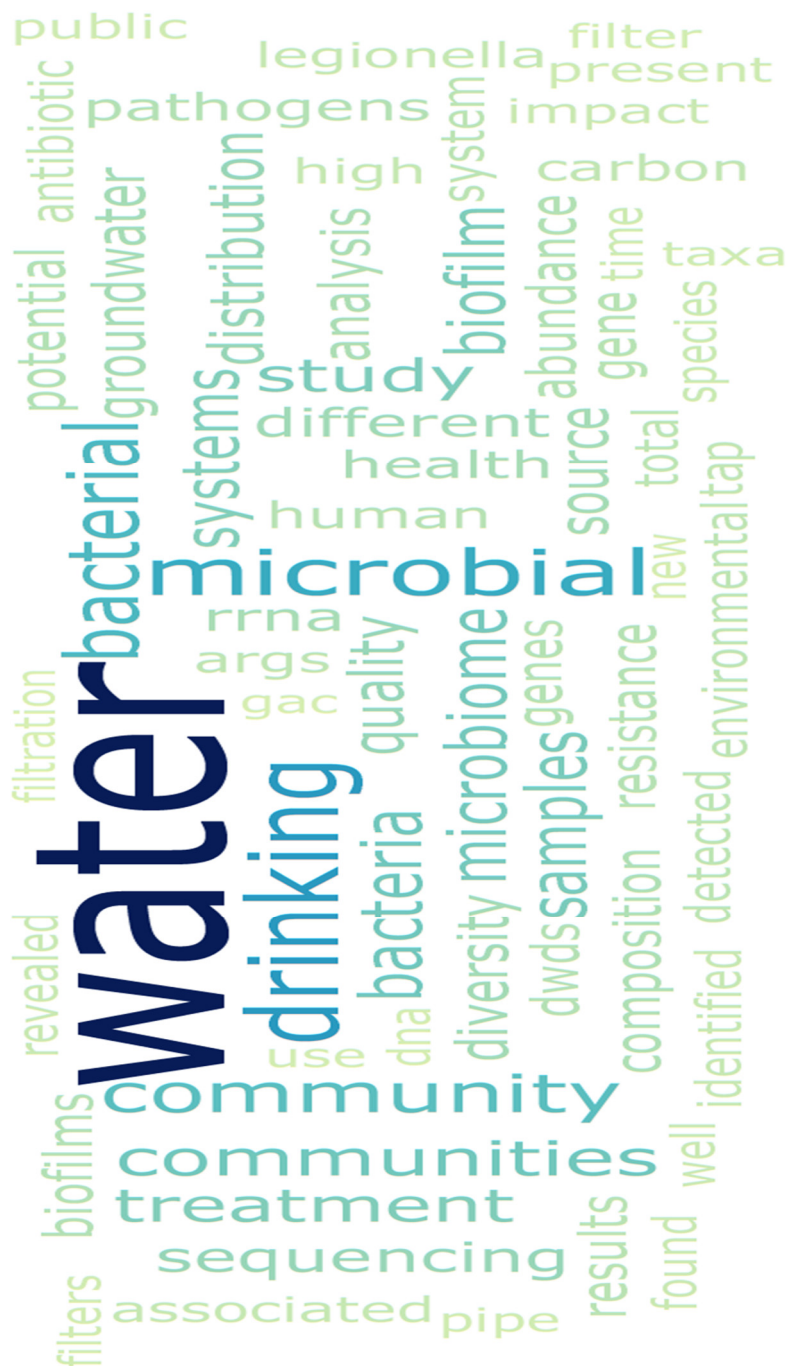

**Figure S1.** Abstract texts word cloud. Word cloud was built starting from abstract texts of Supplementary Table S01 using Lexos (<http://lexos.wheatoncollege.edu/>). The count range displayed spans from the word “water”(the most abundant, count: 1177) to “gac” (count: 44); “diversity” counts 111. “Legionella” is the only term referring to a taxon that appears from the text analysis (count: 66).
