# Supplementary material for: It’s a Long Way to the Tap: Microbiome and DNA-Based Omics at the Core of Drinking Water Quality
Source: Int J Environ Res Public Health. 2022 Jun 28;19(13):7940. doi: 10.3390/ijerph19137940 (PMC9266242; doi:10.3390/ijerph19137940)
Supplement: Supplementary file 1 [file ijerph-19-07940-s001.zip › ijerph-1729745-supplementary/Table S1.xlsx]

## Sheet: Sheet1
Publication Type	Authors	Book Editors	Article Title	Source Title	Language	Document Type	Author Keywords	Abstract	Funding Orgs	Funding Name Preferred	Cited Reference Count	Times Cited, WoS Core	Times Cited, All Databases	180 Day Usage Count	Since 2013 Usage Count	Publisher	Publisher City	Journal Abbreviation	Publication Date	00Publication Year	Volume	Issue	Start Page	End Page	Article Number	DOI	Book DOI	Number of Pages	WoS Categories	Web of Science Index	Research Areas	IDS Number	Pubmed Id	Open Access Designations	Date of Export	UT (Unique WOS ID)
J	Lugli, GA; Longhi, G; Mancabelli, L; Alessandri, G; Tarracchini, C; Fontana, F; Turroni, F; Milani, C; van Sinderen, D; Ventura, M		Tap water as a natural vehicle for microorganisms shaping the human gut microbiome	ENVIRONMENTAL MICROBIOLOGY	English	Article; Early Access		Fresh potable water is an indispensable drink which humans consume daily in substantial amounts. Nonetheless, very little is known about the composition of the microbial community inhabiting drinking water or its impact on our gut microbiota. In the current study, an exhaustive shotgun metagenomics analysis of the tap water microbiome highlighted the occurrence of a highly genetic biodiversity of…	GenProbio Srl; Science Foundation Ireland (SFI), through the Irish Government's National Development Plan [SFI/12/RC/2273a, SFI/12/RC/2273b]; PostDoc fellowship (Bando Ricerca Finalizzata); Italian Ministry of Health through the Bando Ricerca Finalizzata [GR-2018-12365988]; Universita degli Studi di Parma within the CRUI-CARE Agreement	GenProbio Srl; Science Foundation Ireland (SFI), through the Irish Government's National Development Plan(Science Foundation Ireland); PostDoc fellowship (Bando Ricerca Finalizzata); Italian Ministry of Health through the Bando Ricerca Finalizzata; Universita degli Studi di Parma within the CRUI-CARE Agreement		0	0	5	5	WILEY	HOBOKEN	ENVIRON MICROBIOL	early access	2022						10.1111/1462-2920.15988		12	Microbiology	Science Citation Index Expanded (SCI-EXPANDED)	Microbiology	0I1ET	35355372	hybrid		WOS:000779170100001
J	Wu, CC; Connell, M; Zarb, A; Akemann, C; Morgan, S; McElmurry, SP; Love, NG; Baker, TR		Point-of-use carbon-block drinking water filters change gut microbiome of larval zebrafish	ENVIRONMENTAL MICROBIOLOGY REPORTS	English	Article; Early Access		Activated carbon block (ACB) point-of-use (PoU) drinking water filters can change the bacterial composition in drinking water. Consuming ACB PoU filtered water may also influence gut microbiomes. This study uses the zebrafish model to evaluate how the ACB PoU filter affects the gut microbiomes and phenotypic responses in larvae and adulthood. An ACB PoU filter manifold system was constructed to f…				0	0	2	2	WILEY	HOBOKEN	ENV MICROBIOL REP	early access	2022						10.1111/1758-2229.13077		9	Environmental Sciences; Microbiology	Science Citation Index Expanded (SCI-EXPANDED)	Environmental Sciences & Ecology; Microbiology	0Z7QQ	35521795			WOS:000791268700001
J	Atnafu, B; Desta, A; Assefa, F		Microbial Community Structure and Diversity in Drinking Water Supply, Distribution Systems as well as Household Point of Use Sites in Addis Ababa City, Ethiopia	MICROBIAL ECOLOGY	English	Article; Early Access	Disinfection; Illumina sequencing; Microbiota; Opportunistic genera; Taxa; Water supply systems	Understanding ecology of microbiomes in drinking water distribution systems is the most important notion in delivering safe drinking water. Drinking water distribution systems harbor various microbiota despite efforts made in improving water infrastructures in the water industry, especially, in developing countries. Intermittent water supply, long time of water storage, low water pressure, and co…	NSF; Office of graduate programs at Addis Ababa University	NSF(National Science Foundation (NSF)); Office of graduate programs at Addis Ababa University		3	3	6	11	SPRINGER	NEW YORK	MICROB ECOL	early access	2021						10.1007/s00248-021-01819-3		17	Ecology; Marine & Freshwater Biology; Microbiology	Science Citation Index Expanded (SCI-EXPANDED)	Environmental Sciences & Ecology; Marine & Freshwater Biology; Microbiology	UC4DM	34410455			WOS:000686478200001
J	Xia, ST; Gao, W; Li, YX; Ma, J; Gong, SM; Gao, ZP; Tang, WJ; Tian, W; Tang, SG		Effects of melatonin on intestinal function and bacterial compositions in sucking piglets	JOURNAL OF ANIMAL PHYSIOLOGY AND ANIMAL NUTRITION	English	Article; Early Access	amino acids; intestinal development; melatonin; microbiota; piglet	Melatonin has been reported to affect intestinal function by targeting microbiome, morphological structure, barrier integrity and nutrient absorptive system. While the effect of melatonin on intestinal development in newborn infants is obscure, thus, this study firstly attempted to investigate the hypothesis that melatonin treatment improves intestinal development in sucking piglets. 14 healthy n…	National Natural Science Foundation of China [32073020]	National Natural Science Foundation of China(National Natural Science Foundation of China (NSFC))		0	0	6	6	WILEY	HOBOKEN	J ANIM PHYSIOL AN N	early access	2022						10.1111/jpn.13675		10	Agriculture, Dairy & Animal Science; Veterinary Sciences	Science Citation Index Expanded (SCI-EXPANDED)	Agriculture; Veterinary Sciences	YF4BI	35023236			WOS:000741753700001
J	Nakashima, T; Fujii, K; Seki, T; Aoyama, M; Azuma, A; Kawasome, H		Novel Gut Microbiota Modulator, Which Markedly Increases Akkermansia muciniphila Occupancy, Ameliorates Experimental Colitis in Rats	DIGESTIVE DISEASES AND SCIENCES	English	Article; Early Access	Ulcerative colitis; Inflammatory bowel disease; Akkermansia; Dextran sulfate sodium induced colitis; Gut microbiota; OPS-2071	Background Since gut microbiota is involved in the pathogenesis of inflammatory bowel disease (IBD), antibiotics or probiotics may be attractive options for the treatment of IBD. Akkermansia muciniphila is expected as a next-generation probiotic for IBD, and OPS-2071 is a novel quinolone with potent antibacterial activity against Clostridioides difficile. Aims The aim of this study is to assess t…	[OPS-2071]			1	1	3	8	SPRINGER	DORDRECHT	DIGEST DIS SCI	early access	2021						10.1007/s10620-021-07131-x		13	Gastroenterology & Hepatology	Science Citation Index Expanded (SCI-EXPANDED)	Gastroenterology & Hepatology	TJ3HC	34259969			WOS:000673376000002
J	Bai, Y; Ruan, XH; Li, RF; Zhang, YP; Wang, ZZ		Metagenomics-based antibiotic resistance genes diversity and prevalence risk revealed by pathogenic bacterial host in Taihu Lake, China	ENVIRONMENTAL GEOCHEMISTRY AND HEALTH	English	Article; Early Access	Antibiotic resistance genes; Metagenomics technique; Pathogens; Freshwater system	In recent decades, antibiotics and antibiotic resistance genes (ARGs) have been regarded as emerging pollutants. In Taihu Lake, as a typical representative of freshwater system in China, the ARGs occurrence and abundance was of great importance for ecological risk control and public health protection. In this research, high-throughput sequencing and metagenomics technique were used to investigate…	National Key R&D Program of China [2018YFC0408005, 2017YFC0403504]; State Key Program of National Natural Science of China [41230640]; National Water Pollution Control and Treatment Science and Technology Major Project of China	National Key R&D Program of China; State Key Program of National Natural Science of China(National Natural Science Foundation of China (NSFC)); National Water Pollution Control and Treatment Science and Technology Major Project of China		1	1	16	41	SPRINGER	DORDRECHT	ENVIRON GEOCHEM HLTH	early access	2021						10.1007/s10653-021-01021-x		13	Engineering, Environmental; Environmental Sciences; Public, Environmental & Occupational Health; Water Resources	Science Citation Index Expanded (SCI-EXPANDED)	Engineering; Environmental Sciences & Ecology; Public, Environmental & Occupational Health; Water Resources	TQ1EC	34292452	Bronze		WOS:000678029800001
J	Valverde-Bruffau, VJ; Steenland, K; Gonzales, GF		Association between iron supplementation and the presence of diarrhoea in Peruvian children aged 6-59 months: analysis of the database of the Demographic and Family Health Survey in Peru (DHS, Peru), years 2009-2019	PUBLIC HEALTH NUTRITION	English	Article; Early Access	Anaemia; Diarrhoea; Iron supplement; Drinking water; Sewage	Introduction: According to the WHO, anaemia is a severe public health problem when the prevalence is >= 40 %. In 2019, in Peru, 40 center dot 1 % of children (aged 6 to 35 months) are diagnosed as anaemic. This is a concern since, despite the efforts of the governments to reduce the prevalence, the problem has stagnated since 2011. The treatment applied to deal with anaemia is Fe supplementation.…	NIH [U01 TW0101 07]; NIH Fogarty International Center; National Institutes of Environmental Health Sciences; National Cancer Institute; National Institute for Occupational Safety and Health	NIH(United States Department of Health & Human ServicesNational Institutes of Health (NIH) - USA); NIH Fogarty International Center(United States Department of Health & Human ServicesNational Institutes of Health (NIH) - USANIH Fogarty International Center (FIC)); National Institutes of Environmental Health Sciences(United States Department of Health & Human ServicesNational Institutes of Health …		0	0	5	5	CAMBRIDGE UNIV PRESS	CAMBRIDGE	PUBLIC HEALTH NUTR	early access	2021					PII S1368980021004808	10.1017/S1368980021004808		9	Public, Environmental & Occupational Health; Nutrition & Dietetics	Science Citation Index Expanded (SCI-EXPANDED)	Public, Environmental & Occupational Health; Nutrition & Dietetics	YA4SY	34889181	hybrid		WOS:000738326100001
J	Komuroglu, AU; Seckin, H; Ertas, M; Meydan, I		Metagenomic Analysis of Intestinal Microbiota in Florated Rats	BIOLOGICAL TRACE ELEMENT RESEARCH	English	Article; Early Access	Fluorine; Intestinal microflora; 16S rRNA	Changes in gut microbiota have shown that it plays an important role in animal health and metabolic diseases. The intestinal microbiota is a complex structure that functions as an organ system with the presence of trillions of microorganisms. In this study, changes in the intestinal microbiota of Wistar rats with high fluorine were evaluated. Water containing 100 ppm NaF was given to 14 male Wist…				0	0	3	4	SPRINGERNATURE	LONDON	BIOL TRACE ELEM RES	early access	2021						10.1007/s12011-021-03003-7		9	Biochemistry & Molecular Biology; Endocrinology & Metabolism	Science Citation Index Expanded (SCI-EXPANDED)	Biochemistry & Molecular Biology; Endocrinology & Metabolism	WY3IQ	34786660			WOS:000719174500001
J	Bist, P; Choudhary, S		Impact of Heavy Metal Toxicity on the Gut Microbiota and Its Relationship with Metabolites and Future Probiotics Strategy: a Review	BIOLOGICAL TRACE ELEMENT RESEARCH	English	Review; Early Access	Heavy metals; Gut microbiota; Microbiota; Metabolites; Probiotics	The gut microbiota has a vital role in the maintenance of intestinal homeostasis. Several studies have revealed that environmental exposure to pollutants such as heavy metals may contribute to the progression of extensive list of diseases which may further lead to perturbations in the gut leading to dysbiosis. This manuscript critically reviews the alterations in the gut microbiota composition an…				0	0	22	22	SPRINGERNATURE	LONDON	BIOL TRACE ELEM RES	early access	2022						10.1007/s12011-021-03092-4		23	Biochemistry & Molecular Biology; Endocrinology & Metabolism	Science Citation Index Expanded (SCI-EXPANDED)	Biochemistry & Molecular Biology; Endocrinology & Metabolism	YD1OO	34994948			WOS:000740148700003
J	Lacey, KA; Gonzalez, S; Yeung, F; Putzel, G; Podkowik, M; Pironti, A; Shopsin, B; Cadwell, K; Torres, VJ		Microbiome-Independent Effects of Antibiotics in a Murine Model of Nosocomial Infections	MBIO	English	Article; Early Access	MRSA; antibiotics; pneumonia; antimicrobial resistance; murine model; AMR; ESKAPE; infection; mouse; murine models; pathogenesis	Methicillin-resistant Staphylococcus aureus (MRSA) is one of the most common causes of hospital-acquired pneumonia. To better manage patients with MRSA pneumonia, we require a greater understanding of the host-pathogen interactions during infection. MRSA research focuses on highly virulent and cytotoxic strains, which demonstrate robust phenotypes in animal models of infection. However, nosocomia…	National Institutes of Health-National Institute of Allergy and Infectious Diseases [AI149350, AI099394, AI105129, AI137336, AI140754]; Cystic Fibrosis Foundation [LACEY19FO]; Burroughs Wellcome Fund Investigators in the pathogenesis of infectious diseases; Laura and Isaac Perlmutter Cancer Center support grant from the National Institutes of Health/National Cancer Institute [P30CA016087]	National Institutes of Health-National Institute of Allergy and Infectious Diseases(United States Department of Health & Human ServicesNational Institutes of Health (NIH) - USANIH National Institute of Allergy & Infectious Diseases (NIAID)); Cystic Fibrosis Foundation(Italian Cystic Fibrosis Research Foundation); Burroughs Wellcome Fund Investigators in the pathogenesis of infectious diseases(Bur…		0	0	0	0	AMER SOC MICROBIOLOGY	WASHINGTON	MBIO	early access	2022						10.1128/mbio.01240-22		16	Microbiology	Science Citation Index Expanded (SCI-EXPANDED)	Microbiology	1P4IG	35612285			WOS:000801973800002
J	Wu, JQ; Wu, YZ; Chen, Y; Liu, MY; Yu, HY; Zhang, Y; Wang, T		Desmethylbellidifolin Attenuates Dextran Sulfate Sodium-Induced Colitis: Impact on Intestinal Barrier, Intestinal Inflammation and Gut Microbiota	PLANTA MEDICA	English	Article; Early Access	desmethylbellidifolin; Gentianella acuta; Gentianaceae; ulcerative colitis	Ulcerative colitis has been recognized as a chronic inflammatory disease predominantly disturbing the colon and rectum. Clinically, the aminosalicylates, steroids, immunosuppressants, and biological drugs are generally used for the treatment of ulcerative colitis at different stages of disease progression. However, the therapeutic efficacy of these drugs does not satisfy the patients due to the f…	National Natural Science Foundation of China [82074118]; Important Drug Development Fund, Ministry of Science and Technology of China [2018ZX09735-002]	National Natural Science Foundation of China(National Natural Science Foundation of China (NSFC)); Important Drug Development Fund, Ministry of Science and Technology of China		1	1	8	20	GEORG THIEME VERLAG KG	STUTTGART	PLANTA MED	early access	2021						10.1055/a-1506-3476		11	Plant Sciences; Chemistry, Medicinal; Integrative & Complementary Medicine; Pharmacology & Pharmacy	Science Citation Index Expanded (SCI-EXPANDED)	Plant Sciences; Pharmacology & Pharmacy; Integrative & Complementary Medicine	SN7LN	34098585			WOS:000658468800001
J	He, C; Peng, C; Xu, XB; Li, NS; Ouyang, YB; Zhu, Y; Lu, NH		Probiotics mitigate Helicobacter pylori-induced gastric inflammation and premalignant lesions in INS-GAS mice with the modulation of gastrointestinal microbiota	HELICOBACTER	English	Article; Early Access	16S rRNA gene sequencing; gastric carcinogenesis; Helicobacter pylori; probiotics; RNA sequencing	Background Dysbiosis of gastric microbiota including Helicobacter pylori (H. pylori) infection is associated with the development of stomach cancer. Probiotics have been shown to attenuate H. pylori-induced gastritis, although their role in cancer prevention remains unclear. Thus, we aimed to explore the effects of probiotics on H. pylori-induced carcinogenesis and the alterations of gastrointest…	National Natural Science Foundation of China [81860106, 81870395]; Science and Technology Department of Jiangxi Province [20204BCJL23048]; Scientific Research and Cultivation Fund for Young Talents of the Hospital [PRJ-20211018143524471]	National Natural Science Foundation of China(National Natural Science Foundation of China (NSFC)); Science and Technology Department of Jiangxi Province; Scientific Research and Cultivation Fund for Young Talents of the Hospital		0	0	1	1	WILEY	HOBOKEN	HELICOBACTER	early access	2022					e12898	10.1111/hel.12898		13	Gastroenterology & Hepatology; Microbiology	Science Citation Index Expanded (SCI-EXPANDED)	Gastroenterology & Hepatology; Microbiology	1B0CA	35531615			WOS:000792111900001
J	He, XW; Jiang, JH; Zhang, XX		Environmental exposure to low-dose perfluorohexanesulfonate promotes obesity and non-alcoholic fatty liver disease in mice fed a high-fat diet	ENVIRONMENTAL SCIENCE AND POLLUTION RESEARCH	English	Article; Early Access	Perfluorohexanesulfonate; Non-alcoholic fatty liver disease; Obesity; High-fat diet; Metabolomics; Gut microbiome	Perfluorohexanesulfonate (PFHxS) is one of the most prevalent perfluoroalkyls. It is widely distributed in both abiotic and biotic environments because of its prevalence and bioaccumulative properties. Exposure to PFHxS has been associated with the higher serum liver functions associated with steatosis in obese people. This study explores the impact of chronic exposure to low-dose PFHxS on predis…	National Natural Science Foundation of China [51908276]; Excellent Research Program of Nanjing University [ZYJH005]	National Natural Science Foundation of China(National Natural Science Foundation of China (NSFC)); Excellent Research Program of Nanjing University		0	0	17	17	SPRINGER HEIDELBERG	HEIDELBERG	ENVIRON SCI POLLUT R	early access	2022						10.1007/s11356-022-19369-7		12	Environmental Sciences	Science Citation Index Expanded (SCI-EXPANDED)	Environmental Sciences & Ecology	ZI8WL	35217953			WOS:000761894500015
J	Li, SY; Chen, FY; Zou, YT; Ning, LX; Zhang, GC; Zhang, SC; Yao, QY		Yinzhihuang oral liquid protects against non-alcoholic steatohepatitis via modulation of the gut-liver axis in mice	ANNALS OF TRANSLATIONAL MEDICINE	English	Article; Early Access	Yinzhihuang oral liquid; non-alcoholic steatohepatitis (NASH); gut microbiota; gut-liver axis; nuclear factor kappa B (NF?B)	Background: Yinzhihuang (YZH) oral liquid is a traditional Chinese medicine compound that has emerged as a promising therapeutic agent for non-alcoholic fatty liver disease (NAFLD). Here, we aimed to investigate the therapeutic effects of YZH on non-alcoholic steatohepatitis (NASH) and elucidate its underlying molecular mechanisms. Methods: Mice fed on a high-fat diet plus fructose/glucose drinki…	National Natural Science Foundation of China [81500460, 82000575]	National Natural Science Foundation of China(National Natural Science Foundation of China (NSFC))		0	0	3	4	AME PUBL CO	SHATIN	ANN TRANSL MED	early access	2022						10.21037/atm-21-4809		20	Oncology; Medicine, Research & Experimental	Science Citation Index Expanded (SCI-EXPANDED)	Oncology; Research & Experimental Medicine	1J2DW	34988153	gold		WOS:000797733700001
J	Molina-Garcia, M; Malvehy, J; Granger, C; Garre, A; Trullas, C; Puig, S		Exposome and Skin. Part 2. The Influential Role of the Exposome, Beyond UVR, in Actinic Keratosis, Bowen's Disease and Squamous Cell Carcinoma: A Proposal	DERMATOLOGY AND THERAPY	English	Review; Early Access	Actinic keratosis; Dermatology; Environmental factors; Exposome; Hormones; Microbiome; Nutrition; Pollution; Prevention strategies; Squamous cell carcinoma	Actinic keratosis (AK) is the main risk factor for the development of cutaneous invasive squamous cell carcinoma (SCC). It represents the first sign of severe chronic ultraviolet radiation exposure, which has a clear significant effect. Nevertheless, the skin is exposed to many other exposome factors which should be thoroughly considered. Our aim was to assess the impact of exposome factors other…	ISDIN	ISDIN		0	0	5	5	ADIS INT LTD	NORTHCOTE	DERMATOLOGY THER	early access	2022						10.1007/s13555-021-00644-3		20	Dermatology	Science Citation Index Expanded (SCI-EXPANDED)	Dermatology	YR4AW	35112326	Green Published, gold		WOS:000749936000001
J	Wang, MY; Wang, ZX; Huang, LJ; Yang, RX; Zou, ZY; Ge, WS; Ren, TY; Fan, JG		Premorbid Steatohepatitis Increases the Seriousness of Dextran Sulfate Sodium-induced Ulcerative Colitis in Mice	JOURNAL OF CLINICAL AND TRANSLATIONAL HEPATOLOGY	English	Article; Early Access	Inflammatory bowel disease; Ulcerative colitis; Nonalcoholic fatty liver disease; Mouse model; Mortality	Background and Aims: The concurrence of nonalcoholic steatohepatitis (NASH) and ulcerative colitis (UC) is increas-ingly seen in clinical practice, but the underlying mechanisms remain unclear. This study aimed to develop a mouse model of the phenomenon by combining high-fat high-cholesterol diet (HFHCD)-induced NASH and dextran sulfate sodium (DSS)-induced UC, that would support mechanistic stud…	National Key Research and Development Program [2017YFC0908903]; National Natural Science Foundation of China [81873565, 81900507, 82170593]	National Key Research and Development Program; National Natural Science Foundation of China(National Natural Science Foundation of China (NSFC))		0	0	0	0	XIA & HE PUBLISHING INC	SUGAR LAND	J CLIN TRANSL HEPATO	early access	2022						10.14218/JCTH.2021.00315		13	Gastroenterology & Hepatology	Science Citation Index Expanded (SCI-EXPANDED)	Gastroenterology & Hepatology	1C2NN		gold		WOS:000792962500001
J	Helmy, YA; Kathayat, D; Deblais, L; Srivastava, V; Closs, G; Tokarski, RJ; Ayinde, O; Fuchs, JR; Rajashekara, G		Evaluation of Novel Quorum Sensing Inhibitors Targeting Auto-Inducer 2 (AI-2) for the Control of Avian Pathogenic Escherichia coli Infections in Chickens	MICROBIOLOGY SPECTRUM	English	Article; Early Access	APEC; quorum sensing; inhibitors; anti-virulence; auto-inducer 2; QSI-5; sulfadimethoxine; 5 '-methylthioadenosine; chickens	Avian pathogenic Escherichia coil (APEC) associated with colibacillosis results in high morbidity and mortality, and severe economic losses to the poultry industry. APEC is a zoonotic pathogen and can infect humans through contaminated poultry products. Vaccination and antibiotic treatment are currently used to control APEC infections; however, the limited effect of vaccines and the emergence of …	U.S. Department of Agriculture (USDA); National Institute for Food and Agriculture (NIFA) [2015-68004-23131, 2020-6701-31401]; Technology Commercialization Office (TCO) of The Ohio State University; Ohio State Innovation Foundation	U.S. Department of Agriculture (USDA)(United States Department of Agriculture (USDA)); National Institute for Food and Agriculture (NIFA); Technology Commercialization Office (TCO) of The Ohio State University; Ohio State Innovation Foundation		0	0	0	0	AMER SOC MICROBIOLOGY	WASHINGTON	MICROBIOL SPECTR	early access	2022						10.1128/spectrum.00286-22		16	Microbiology	Science Citation Index Expanded (SCI-EXPANDED)	Microbiology	1M1LF	35583333			WOS:000799736800002
J	Chavez-Capilla, T		The Need to Unravel Arsenolipid Transformations in Humans	DNA AND CELL BIOLOGY	English	Article; Early Access	arsenic; arsenolipids; biotransformations in humans; toxicology	The main source of arsenic exposure to humans worldwide is the diet, in particular, drinking water, rice, and seafood. Although arsenic is often considered toxic, it can exist in food as more than 300 chemical species with different toxicities. This diversity makes it difficult for food safety and health authorities to regulate arsenic levels in food, which are currently based on a few arsenic sp…	University of Bern	University of Bern		0	0	14	14	MARY ANN LIEBERT, INC	NEW ROCHELLE	DNA CELL BIOL	early access	2021						10.1089/dna.2021.0476		7	Biochemistry & Molecular Biology; Cell Biology; Genetics & Heredity	Science Citation Index Expanded (SCI-EXPANDED)	Biochemistry & Molecular Biology; Cell Biology; Genetics & Heredity	XT4ZI	34941367	Green Published, hybrid		WOS:000733597100001
J	Li, XY; Wu, Y; Xie, GZ; Tan, ZJ		Effects of chronic cadmium exposure on the structure and function of intestinal mucosal flora in mice	TOXIN REVIEWS	English	Article; Early Access	Cadmium; intestinal mucosal flora; characteristic bacteria; metabolic function; microbial activity	Cadmium (Cd) is a serious environmental pollutant to human health. Intestinal flora is associated with human health. This study probed into the effects of Cd on the small intestinal mucosal flora in mice by drinking water intake 5 ppm, 20 ppm and 100 ppm cadmium chloride for 50 days respectively. Results indicated that diversity, taxonomic composition and community structure of intestinal mucosal…				0	0	8	20	TAYLOR & FRANCIS INC	PHILADELPHIA	TOXIN REV	early access	2021						10.1080/15569543.2021.1955712		14	Toxicology	Science Citation Index Expanded (SCI-EXPANDED)	Toxicology	TP6JY				WOS:000677705100001
J	Peng, YY; Chen, Z; Li, YZ; Wang, YT; Ye, CS; Xu, JM; Zhang, SH		Bacteriostasis and cleaning effect of trace ozone replacing personal care products	ENVIRONMENTAL TECHNOLOGY	English	Article; Early Access	Trace ozone; personal care products (PCPs); skin microbiome; inactivation; cleaning performance	Ozone is widely used to inactivate bacteria, fungi, and viruses. In recent years, the treatment of itchy skin diseases (eczema and atopic dermatitis) using trace ozone has also received attention. However, the feasibility of using trace ozone to replace personal care products (PCPs) has rarely been analyzed. In this study, the applicability of trace ozone was evaluated in terms of its efficiency …	Natural Science Foundation of China [52070177]; Key Natural Science Foundation of Fujian [2020J02009]; Public Welfare Science and Technology Plan Projects of Ningbo [2021S115]	Natural Science Foundation of China(National Natural Science Foundation of China (NSFC)); Key Natural Science Foundation of Fujian; Public Welfare Science and Technology Plan Projects of Ningbo		0	0	4	4	TAYLOR & FRANCIS LTD	ABINGDON	ENVIRON TECHNOL	early access	2022						10.1080/09593330.2022.2036818		14	Environmental Sciences	Science Citation Index Expanded (SCI-EXPANDED)	Environmental Sciences & Ecology	ZD2XC	35099355			WOS:000758065800001
J	McLain, NK; Gomez, MY; Gachomo, EW		Acetaminophen Levels Found in Recycled Wastewater Alter Soil Microbial Community Structure and Functional Diversity	MICROBIAL ECOLOGY	English	Article; Early Access	Contaminants of emerging concern; Treated wastewater; Soil bacterial community; Soil microbiome	The practice of using recycled wastewater (RWW) has been successfully adopted to address the growing demand for clean water. However, chemicals of emerging concern (CECs) including pharmaceutical products remain in the RWW even after additional cleaning. When RWW is used to irrigate crops or landscapes, these chemicals can enter these and adjacent environments. Unfortunately, the overall composit…	University of California, Riverside; USDA National Institute of Food and Agriculture, Multistate Research Fund [1018746]	University of California, Riverside(University of California System); USDA National Institute of Food and Agriculture, Multistate Research Fund		0	0	3	3	SPRINGER	NEW YORK	MICROB ECOL	early access	2022						10.1007/s00248-022-02022-8		15	Ecology; Marine & Freshwater Biology; Microbiology	Science Citation Index Expanded (SCI-EXPANDED)	Environmental Sciences & Ecology; Marine & Freshwater Biology; Microbiology	0Y8BJ	35507048	hybrid		WOS:000790609800001
J	Vanhaecke, T; Bretin, O; Poirel, M; Tap, J		Drinking Water Source and Intake Are Associated with Distinct Gut Microbiota Signatures in US and UK Populations	JOURNAL OF NUTRITION	English	Article	drinking water; water source; water intake; human microbiome; gut microbiota diversity; oral microbiota; American Gut Project	Background: The microbiome of the digestive tract exerts fundamental roles in host physiology. Extrinsic factors including lifestyle and diet are widely recognized as key drivers of gut and oral microbiome compositions. Although drinking water is among the food items consumed in the largest amount, little is known about its potential impact on the microbiome. Objectives: We explored the associati…			59	0	0	3	3	OXFORD UNIV PRESS	OXFORD	J NUTR	JAN	2022	152	1	171	182		10.1093/jn/nxab312		12	Nutrition & Dietetics	Science Citation Index Expanded (SCI-EXPANDED)	Nutrition & Dietetics	YK2GK	34642755	Green Published, hybrid	2022-05-29	WOS:000745037900019
J	Nadimpalli, ML; Lanza, VF; Montealegre, MC; Sultana, S; Fuhrmeister, ER; Worby, CJ; Teichmann, L; Caduff, L; Swarthout, JM; Crider, YS; Earl, AM; Brown, J; Luby, SP; Islam, MA; Julian, TR; Pickering, AJ		Drinking water chlorination has minor effects on the intestinal flora and resistomes of Bangladeshi children	NATURE MICROBIOLOGY	English	Article		Healthy development of the gut microbiome provides long-term health benefits. Children raised in countries with high infectious disease burdens are frequently exposed to diarrhoeal pathogens and antibiotics, which perturb gut microbiome assembly. A recent cluster-randomized trial leveraging >4,000 child observations in Dhaka, Bangladesh, found that automated water chlorination of shared taps effe…	Thrasher Research Fund [14205]; World Bank Strategic Impact Evaluation Fund; National Institutes of Health (NIH) [KL2TR002545]; Stuart B. Levy Center for Integrated Management of Antimicrobial Resistance at Tufts; Tufts Medical Center; Tufts University Office of the Vice Provost for Research (OVPR) Research and Scholarship Strategic Plan (RSSP); National Institute of Allergy and Infectious Diseas…	Thrasher Research Fund; World Bank Strategic Impact Evaluation Fund; National Institutes of Health (NIH)(United States Department of Health & Human ServicesNational Institutes of Health (NIH) - USA); Stuart B. Levy Center for Integrated Management of Antimicrobial Resistance at Tufts; Tufts Medical Center; Tufts University Office of the Vice Provost for Research (OVPR) Research and Scholarship St…	65	0	0	3	3	NATURE PORTFOLIO	BERLIN	NAT MICROBIOL	MAY	2022	7	5	620	#ERROR!		10.1038/s41564-022-01101-3		19	Microbiology	Science Citation Index Expanded (SCI-EXPANDED)	Microbiology	0Y3KY	35422497		2022-05-29	WOS:000782533000001
J	Zhang, LY; Ben Said, L; Herve, N; Zirah, S; Diarra, MS; Fliss, I		Effects of drinking water supplementation with Lactobacillus reuteri, and a mixture of reuterin and microcin J25 on the growth performance, caecal microbiota and selected metabolites of broiler chickens	JOURNAL OF ANIMAL SCIENCE AND BIOTECHNOLOGY	English	Article	Broiler chicken; Lactobacillus reuteri; Metabolome; Microbiome; Microcin J25; Reuterin; SCFA	Background Since the overuse of antibiotics in animal production has led to a selection of antibiotic-resistant pathogens that affect humans and animals as well. Scientists are therefore searching for novel natural alternatives to antibiotics. In this study Lactobacillus reuteri and a combination of reuterin and microcin J25 (RJ) were evaluated as promoters of growth and modulators of the cecal m…	Natural Sciences and Engineering Research Council (NSERC) of Canada industrial research chair METABIOLAC [IRCPJ 499946-15]; Agriculture and Agri-Food Canada [1781, J-002308]	Natural Sciences and Engineering Research Council (NSERC) of Canada industrial research chair METABIOLAC; Agriculture and Agri-Food Canada(Agriculture & Agri Food Canada)	45	0	0	1	1	BMC	LONDON	J ANIM SCI BIOTECHNO	2022-03-05	2022	13	1			34	10.1186/s40104-022-00683-6		13	Agriculture, Dairy & Animal Science	Science Citation Index Expanded (SCI-EXPANDED)	Agriculture	ZN0AX	35246239	gold, Green Published	2022-05-29	WOS:000764709300001
J	Thom, C; Smith, CJ; Moore, G; Weir, P; Ijaz, UZ		Microbiomes in drinking water treatment and distribution: A meta-analysis from source to tap	WATER RESEARCH	English	Article	Drinking water; amplicon sequencing; microbiome; pathogens; bacteria; biofilm	A meta-analysis of existing and available Illumina 16S rRNA datasets from drinking water source, treatment and drinking water distribution systems (DWDS) were collated to compare changes in abundance and diversity throughout. Samples from bulk water and biofilm were used to assess principles governing microbial community assembly and the value of amplicon sequencing to water utilities. Individual…	Scottish Water Industry; EPSRC [EP/V030515/1]; Royal Academy of Engineering-Scottish Water Research Chair [RCSRF171864]; NERC, UK [NE/L011956/1]	Scottish Water Industry; EPSRC(UK Research & Innovation (UKRI)Engineering & Physical Sciences Research Council (EPSRC)); Royal Academy of Engineering-Scottish Water Research Chair; NERC, UK(UK Research & Innovation (UKRI)Natural Environment Research Council (NERC))	73	0	0	38	38	PERGAMON-ELSEVIER SCIENCE LTD	OXFORD	WATER RES	2022-04-01	2022	212				118106	10.1016/j.watres.2022.118106		11	Engineering, Environmental; Environmental Sciences; Water Resources	Science Citation Index Expanded (SCI-EXPANDED)	Engineering; Environmental Sciences & Ecology; Water Resources	ZE6TK	35091225		2022-05-29	WOS:000759012500004
J	Amorim, N; McGovern, E; Raposo, A; Khatiwada, S; Shen, S; Koentgen, S; Hold, G; Behary, J; El-Omar, E; Zekry, A		Refining a Protocol for Faecal Microbiota Engraftment in Animal Models After Successful Antibiotic-Induced Gut Decontamination	FRONTIERS IN MEDICINE	English	Article	antibiotics; faecal microbiota transplant; microbiome; gut decontamination; gut engraftment	BackgroundThere is mounting evidence for the therapeutic use of faecal microbiota transplant (FMT) in numerous chronic inflammatory diseases. Germ free mice are not always accessible for FMT research and hence alternative approaches using antibiotic depletion prior to FMT in animal studies are often used. Hence, there is a need for standardising gut microbiota depletion and FMT methodologies in a…	Sir Owen Glenn grant, UNSW [RG182137]	Sir Owen Glenn grant, UNSW	46	0	0	6	6	FRONTIERS MEDIA SA	LAUSANNE	FRONT MED-LAUSANNE	2022-02-09	2022	9				770017	10.3389/fmed.2022.770017		9	Medicine, General & Internal	Science Citation Index Expanded (SCI-EXPANDED)	General & Internal Medicine	ZH1RR	35223890	Green Published, gold	2022-05-29	WOS:000760724100001
J	Wang, XR; Zhu, LY; Li, XQ; Wang, X; Hao, RR; Li, JJ		Effects of high fructose corn syrup on intestinal microbiota structure and obesity in mice	NPJ SCIENCE OF FOOD	English	Article		High fructose corn syrup (HFCS)-associated health problems have raised concerns. We investigated the effects of HFCS-containing drinking water on body fat, intestinal microbiota structure of mice, and the relationships between them. HFCS drinking water significantly increased body fat content and altered the intestinal microbiome. The Christensenellaceae R-7 group negatively correlated with body …	State Key Laboratory for Managing Biotic and Chemical Threats to the Quality and Safety of Agroproducts [2010DS700124-ZZ2017]	State Key Laboratory for Managing Biotic and Chemical Threats to the Quality and Safety of Agroproducts	24	0	0	29	29	NATURE PORTFOLIO	BERLIN	NPJ SCI FOOD	2022-03-02	2022	6	1			17	10.1038/s41538-022-00133-7		4	Food Science & Technology	Science Citation Index Expanded (SCI-EXPANDED)	Food Science & Technology	ZL0TY	35236837	Green Published, gold	2022-05-29	WOS:000763394200001
J	Ma, LP; Jiang, XT; Guan, L; Li, B; Zhang, T		Nationwide biogeography and health implications of bacterial communities in household drinking water	WATER RESEARCH	English	Article	Drinking water; Microbial diversity; Biogeography; Public health	Drinking water at the point of use harbors microorganisms that may pose potential risks to human health. However, the microbial diversity and health impacts of household drinking water are poorly understood, since culture-based methods only target on specific microorganisms and low biomass of drinking water hinders a high throughput profiling. Here, we used an optimized workflow to efficiently co…	Hong Kong Theme Based Research [T21-705/20-N]; National Science Foundation of China [41907356]; Program for Professor of Special Appointment (Eastern Scholar) [TP2019020]; Shanghai Pujiang Talent Program [19PJ1402600]; Fundamental Research Funds for the Central Universities	Hong Kong Theme Based Research; National Science Foundation of China(National Natural Science Foundation of China (NSFC)); Program for Professor of Special Appointment (Eastern Scholar); Shanghai Pujiang Talent Program; Fundamental Research Funds for the Central Universities(Fundamental Research Funds for the Central Universities)	59	0	0	15	15	PERGAMON-ELSEVIER SCIENCE LTD	OXFORD	WATER RES	2022-05-15	2022	215				118238	10.1016/j.watres.2022.118238		11	Engineering, Environmental; Environmental Sciences; Water Resources	Science Citation Index Expanded (SCI-EXPANDED)	Engineering; Environmental Sciences & Ecology; Water Resources	1A3ZP	35278916		2022-05-29	WOS:000791699500002
J	Vanhaecke, T		Associations between Drinking Water Source and Gut Microbiota Composition in the American Gut Project Database	ANNALS OF NUTRITION AND METABOLISM	English	Meeting Abstract	Drinking water; Gut microbiota diversity; 16s rRNA gene				7	1	1	0	0	KARGER	BASEL	ANN NUTR METAB	FEB	2022	77		17	18		10.1159/000520780		2	Endocrinology & Metabolism; Nutrition & Dietetics	Science Citation Index Expanded (SCI-EXPANDED)	Endocrinology & Metabolism; Nutrition & Dietetics	ZZ0LV	35226912	hybrid	2022-05-29	WOS:000772969300008
J	Tiwari, A; Gomez-Alvarez, V; Siponen, S; Sarekoski, A; Hokajarvi, AM; Kauppinen, A; Torvinen, E; Miettinen, IT; Pitkanen, T		Bacterial Genes Encoding Resistance Against Antibiotics and Metals in Well-Maintained Drinking Water Distribution Systems in Finland	FRONTIERS IN MICROBIOLOGY	English	Article	drinking water distribution system; drinking water treatment; disinfection; metagenomics; mercury resistant gene; antibiotic resistance genes	Information on the co-occurrence of antibiotic resistance genes (ARGs) and metal resistance genes (MRGs) among bacterial communities in drinking water distribution systems (DWDSs) is scarce. This study characterized ARGs and MRGs in five well-maintained DWDSs in Finland. The studied DWDSs had different raw water sources and treatment methods. Two of the waterworks employed artificially recharged …	Academy of Finland (DWDSOME) [275549]	Academy of Finland (DWDSOME)(Academy of Finland)	50	0	0	9	9	FRONTIERS MEDIA SA	LAUSANNE	FRONT MICROBIOL	2022-02-07	2022	12				803094	10.3389/fmicb.2021.803094		9	Microbiology	Science Citation Index Expanded (SCI-EXPANDED)	Microbiology	ZH1GS	35197945	Green Published, gold	2022-05-29	WOS:000760695600001
J	Gay, MD; Cao, H; Shivapurkar, N; Dakshanamurthy, S; Kallakury, B; Tucker, RD; Kwagyan, J; Smith, JP		Proglumide Reverses Nonalcoholic Steatohepatitis by Interaction with the Farnesoid X Receptor and Altering the Microbiome	INTERNATIONAL JOURNAL OF MOLECULAR SCIENCES	English	Article	nonalcoholic steatohepatitis; microbiome; FXR; CCK receptor; NASH	Nonalcoholic steatohepatitis (NASH) is associated with obesity, metabolic syndrome, and dysbiosis of the gut microbiome. Cholecystokinin (CCK) is released by saturated fats and plays an important role in bile acid secretion. CCK receptors are expressed on cholangiocytes, and CCK-B receptor expression increases in the livers of mice with NASH. The farnesoid X receptor (FXR) is involved in bile aci…	AACR Bayer-Innovative and Discovery Grant [19-80-44]; NIH K01 award [CA255572, TL1TR001431, CA051008]	AACR Bayer-Innovative and Discovery Grant; NIH K01 award(United States Department of Health & Human ServicesNational Institutes of Health (NIH) - USA)	66	0	0	2	2	MDPI	BASEL	INT J MOL SCI	FEB	2022	23	3			1899	10.3390/ijms23031899		17	Biochemistry & Molecular Biology; Chemistry, Multidisciplinary	Science Citation Index Expanded (SCI-EXPANDED)	Biochemistry & Molecular Biology; Chemistry	ZG0XM	35163821	gold, Green Submitted, Green Published	2022-05-29	WOS:000759988400001
J	Bongers, KS; McDonald, RA; Winner, KM; Falkowski, NR; Brown, CA; Baker, JM; Hinkle, KJ; Fergle, DJ; Dickson, RP		Antibiotics cause metabolic changes in mice primarily through microbiome modulation rather than behavioral changes	PLOS ONE	English	Article		Background The microbiome is an important and increasingly-studied mediator of organismal metabolism, although how the microbiome affects metabolism remains incompletely understood. Many investigators use antibiotics to experimentally perturb the microbiome. However, antibiotics have poorly understood yet profound off-target effects on behavior and diet, including food and water aversion, that ca…			38	0	0	3	3	PUBLIC LIBRARY SCIENCE	SAN FRANCISCO	PLOS ONE		2022	17	3			e0265023	10.1371/journal.pone.0265023		17	Multidisciplinary Sciences	Science Citation Index Expanded (SCI-EXPANDED)	Science & Technology - Other Topics	0P4LU	35298489	Green Published, gold	2022-05-29	WOS:000784193600038
J	Wang, HD; Zhang, MS; Li, J; Liang, JH; Yang, MJ; Xia, GH; Ren, YR; Zhou, HW; Wu, QH; He, Y; Yin, J		Gut microbiota is causally associated with poststroke cognitive impairment through lipopolysaccharide and butyrate	JOURNAL OF NEUROINFLAMMATION	English	Article	Post-stroke cognitive impairment; Lipopolysaccharide; Fecal microbiota transplantation; Hippocampal apoptosis; beta-Amyloid	Background: Poststroke cognitive impairment (PSCI) is prevalent in stroke patients. The etiology of PSCI remains largely unknown. We previously found that stroke induces gut microbiota dysbiosis which affects brain injury. Hereby, we aimed to investigate whether the gut microbiota contributes to the pathogenesis of PSCI. Methods: 83 stroke patients were recruited and their cognitive function were…	National Natural Science Foundation of China [NSFC81870936, NSFC82171317]	National Natural Science Foundation of China(National Natural Science Foundation of China (NSFC))	51	0	0	7	7	BMC	LONDON	J NEUROINFLAMM	2022-04-04	2022	19	1			76	10.1186/s12974-022-02435-9		15	Immunology; Neurosciences	Science Citation Index Expanded (SCI-EXPANDED)	Immunology; Neurosciences & Neurology	0G4KG	35379265	gold, Green Published	2022-05-29	WOS:000778015400001
J	Pinar-Mendez, A; Wangensteen, OS; Praebel, K; Galofre, B; Mendez, J; Blanch, AR; Garcia-Aljaro, C		Monitoring Bacterial Community Dynamics in a Drinking Water Treatment Plant: An Integrative Approach Using Metabarcoding and Microbial Indicators in Large Water Volumes	WATER	English	Article	water quality monitoring; drinking water treatment plant; drinking water; 16S rRNA metabarcoding; amplicon sequencing; hollow fiber ultrafiltration; bacterial diversity	Monitoring bacterial communities in a drinking water treatment plant (DWTP) may help to understand their regular operations. Bacterial community dynamics in an advanced full-scale DWTP were analyzed by 16S rRNA metabarcoding, and microbial water quality indicators were determined at nine different stages of potabilization: river water and groundwater intake, decantation, sand filtration, ozonizat…	Pla de Doctorats Industrials of the Catalan Government [2016 DI 083]	Pla de Doctorats Industrials of the Catalan Government	0	0	0	0	0	MDPI	BASEL	WATER-SUI	MAY	2022	14	9			1435	10.3390/w14091435		26	Environmental Sciences; Water Resources	Science Citation Index Expanded (SCI-EXPANDED)	Environmental Sciences & Ecology; Water Resources	1F6BH		gold	2022-05-29	WOS:000795251700001
J	Takeuchi, H; Yoshikane, Y; Takenaka, H; Kimura, A; Islam, JM; Matsuda, R; Okamoto, A; Hashimoto, Y; Yano, R; Yamaguchi, K; Sato, S; Ishizuka, S		Health Effects of Drinking Water Produced from Deep Sea Water: A Randomized Double-Blind Controlled Trial	NUTRIENTS	English	Article	health effect; deep sea water (DSW)-based drinking water; body maintenance; short-chain-fatty-acid; sIgA; daidzein-to-equol conversion; intestinal microbiota	Global trends focus on a balanced intake of foods and beverages to maintain health. Drinking water (MIU; hardness = 88) produced from deep sea water (DSW) collected offshore of Muroto, Japan, is considered healthy. We previously reported that the DSW-based drinking water (RDSW; hardness = 1000) improved human gut health. The aim of this randomized double-blind controlled trial was to assess the e…	Ministry of Health, Labor and Welfare in Japan; JSPS KAKENHI [20K07857]	Ministry of Health, Labor and Welfare in Japan(Ministry of Health, Labour and Welfare, Japan); JSPS KAKENHI(Ministry of Education, Culture, Sports, Science and Technology, Japan (MEXT)Japan Society for the Promotion of ScienceGrants-in-Aid for Scientific Research (KAKENHI))	43	0	0	2	2	MDPI	BASEL	NUTRIENTS	FEB	2022	14	3			581	10.3390/nu14030581		14	Nutrition & Dietetics	Science Citation Index Expanded (SCI-EXPANDED)	Nutrition & Dietetics	ZB0LY	35276942	Green Published, gold	2022-05-29	WOS:000756545800001
J	Zhong, N; Ma, YZ; Meng, XY; Sowanou, A; Wu, LW; Huang, W; Gao, YH; Pei, JR		Effect of Fluoride in Drinking Water on Fecal Microbial Community in Rats	BIOLOGICAL TRACE ELEMENT RESEARCH	English	Article	Fluoride; Fecal microbiota; 16S rRNA gene sequencing; Dental fluorosis	Intestinal nutrition has a close association with the onset and development of fluorosis. Intestinal microbes play a major role in intestinal nutrition. However, the effect of fluoride on intestinal microbes is still not fully understood. This study aimed to evaluate the dose-response of fluoride on fecal microbes as well as the link between fluorosis and fecal microbes. The results showed that f…	National Natural Science Foundation of China [81773468, 81302389]; Wu Liande Science Foundation of Harbin Medical University [WLD-QN1703]; Postdoctoral Scientific Research Developmental Fund of Heilongjiang Province [LBH-Q17092]	National Natural Science Foundation of China(National Natural Science Foundation of China (NSFC)); Wu Liande Science Foundation of Harbin Medical University; Postdoctoral Scientific Research Developmental Fund of Heilongjiang Province	39	0	0	5	8	SPRINGERNATURE	LONDON	BIOL TRACE ELEM RES	JAN	2022	200	1	238	246		10.1007/s12011-021-02617-1		9	Biochemistry & Molecular Biology; Endocrinology & Metabolism	Science Citation Index Expanded (SCI-EXPANDED)	Biochemistry & Molecular Biology; Endocrinology & Metabolism	WV9MF	33576944		2022-05-29	WOS:000617391400001
J	Guo, XX; Xu, Y; Geng, RX; Qiu, J; He, XY		Curcumin Alleviates Dextran Sulfate Sodium-Induced Colitis in Mice Through Regulating Gut Microbiota	MOLECULAR NUTRITION & FOOD RESEARCH	English	Article	curcumin; colitis; gut barrier; inflammation; apoptosis; gut microbiota	Scope Curcumin is a natural polyphenol compound with multiple pharmacologic activities. The present study aims to explore the potential therapeutic properties of curcumin on intestinal inflammatory diseases, including its anti-inflammatory, antioxidant, and anti-apoptotic properties, as well as their associations with altered intestinal microbiome. Methods and Results DSS, i.e., Dextran Sulfate S…	National Key Research and Development Program of China [2018YFC1604000]	National Key Research and Development Program of China	66	0	0	20	20	WILEY	HOBOKEN	MOL NUTR FOOD RES	APR	2022	66	8			2100943	10.1002/mnfr.202100943		12	Food Science & Technology	Science Citation Index Expanded (SCI-EXPANDED)	Food Science & Technology	0X2IL	35106903		2022-05-29	WOS:000756705300001
J	Clavijo, V; Morales, T; Vives-Flores, MJ; Munoz, AR		The gut microbiota of chickens in a commercial farm treated with a Salmonella phage cocktail	SCIENTIFIC REPORTS	English	Article		The microbiota in broiler chicken intestines affects the animals' health, metabolism, and immunity both positively and negatively. Accordingly, it has a significant impact on animal productivity. Phages, host-specific parasites of bacterial cells, are a promising antimicrobial alternative that selectively target pathogens without disturbing the microbiota. The purpose of this study is to further …	School of Sciences, Universidad de los Andes [INV-2017-25-1117, INV-2018-48-1342, INV-2018-50-1399]; Universidad de los Andes [P16.700099.001/02-04]; Instituto Tecnologico de Estudios Superiores de Monterrey [P16.700099.001/02-04, INV-2019-87-1887]; Instituto Tecnologico de Estudios Superiores de Monterrey; Colciencias [1204-569-34190, 0845-2013]	School of Sciences, Universidad de los Andes; Universidad de los Andes; Instituto Tecnologico de Estudios Superiores de Monterrey; Instituto Tecnologico de Estudios Superiores de Monterrey; Colciencias(Departamento Administrativo de Ciencia, Tecnologia e Innovacion Colciencias)	58	0	0	4	4	NATURE PORTFOLIO	BERLIN	SCI REP-UK	2022-01-19	2022	12	1			991	10.1038/s41598-021-04679-6		16	Multidisciplinary Sciences	Science Citation Index Expanded (SCI-EXPANDED)	Science & Technology - Other Topics	YJ6DB	35046416	gold, Green Published	2022-05-29	WOS:000744620600058
J	Wang, DD; Jiang, YT; Wu, D; Li, SX; Wu, ZD; Zhong, Y; Zhang, L; Guo, CS; Li, XT; Sun, LL; Li, Q; Zhou, JH; He, WY		Health Effect of N-Nitroso Diethylamine in Treated Water on Gut Microbiota Using a Simulated Human Intestinal Microbiota System	PROCESSES	English	Article	health effect; treated water; N-nitroso diethylamine; gut microbiota; chlorination disinfection by-products	Chlorination disinfection byproducts (CDBPs) can exert adverse human health effects. Many toxicology-based studies confirmed the health hazards of CDBPs, but little research has been done on gut microbiome. We explored the effect of CDBPs on intestinal microbiota in the Simulator of the Human Intestinal Microbial Ecosystem (SHIME). The results showed that CDBPs slightly inhibited the production o…	Science and Technology Program of Guangzhou [201904010161]; Guangzhou Municipal Science and Technology Project [20191A011063]	Science and Technology Program of Guangzhou; Guangzhou Municipal Science and Technology Project	53	0	0	1	1	MDPI	BASEL	PROCESSES	MAR	2022	10	3			438	10.3390/pr10030438		12	Engineering, Chemical	Science Citation Index Expanded (SCI-EXPANDED)	Engineering	0B0OW		Green Published, gold	2022-05-29	WOS:000774344300001
J	Green, PG; Alvarez, P; Levine, JD		Probiotics attenuate alcohol-induced muscle mechanical hyperalgesia: Preliminary observations	MOLECULAR PAIN	English	Article	Ethanol; myalgia; muscle pain; nociceptors; probiotics; microbiome	Alcohol use disorder (AUD) is a major health problem that causes millions of deaths annually world-wide. AUD is considered to be a chronic pain disorder, that is exacerbated by alcohol withdrawal, contributing to a high (similar to 80%) relapse rate. Chronic alcohol consumption has a marked impact on the gut microbiome, recognized to have a significant effect on chronic pain. We tested the hypoth…	National Institute of Arthritis and Musculoskeletal and Skin Diseases [AR063312]	National Institute of Arthritis and Musculoskeletal and Skin Diseases(United States Department of Health & Human ServicesNational Institutes of Health (NIH) - USANIH National Institute of Arthritis & Musculoskeletal & Skin Diseases (NIAMS))	74	0	0	0	0	SAGE PUBLICATIONS INC	THOUSAND OAKS	MOL PAIN	2022-02-11	2022	18				1.74481e+16	10.1177/17448069221075345		6	Neurosciences	Science Citation Index Expanded (SCI-EXPANDED); Social Science Citation Index (SSCI)	Neurosciences & Neurology	ZN8GD	35189754	gold, Green Published	2022-05-29	WOS:000765265600001
J	Wang, J; Liu, T; Liu, LF; Chen, X; Zhang, X; Du, HY; Wang, C; Li, J; Li, JH		Immune dysfunction induced by 2,6-dichloro-1,4-benzoquinone, an emerging water disinfection byproduct, due to the defects of host-microbiome interactions	CHEMOSPHERE	English	Article	Disinfection byproducts; 6-Dichloro-1; 4-benzoquinone; Gut microbiota; Anti-inflammatory response; Metabolomics	2,6-dichloro-1,4-benzoquinone (DCBQ), as an emerging water disinfection byproducts (DBPs), has posed potential risks via the digestion system. However, little is known about the toxicity of DCBQ on the gut microbiome, which plays a critical role on human health. This study has comprehensively investigated the impact of DCBQ on the intestinal microbiome, metabolic functions, and immunity after the…	China CDC Key Laboratory of Environment and Population Health, National Institute of Environmental Health, Chinese Center for Disease Control and Prevention [2021-CKL02]; Jilin University; Bethune Research Project of Jilin University [2018B34]; Graduate Innovation Fund of Jilin University [101832020CX272]	China CDC Key Laboratory of Environment and Population Health, National Institute of Environmental Health, Chinese Center for Disease Control and Prevention; Jilin University(Jilin University); Bethune Research Project of Jilin University; Graduate Innovation Fund of Jilin University(Jilin University)	60	0	0	22	22	PERGAMON-ELSEVIER SCIENCE LTD	OXFORD	CHEMOSPHERE	MAY	2022	294				133777	10.1016/j.chemosphere.2022.133777		14	Environmental Sciences	Science Citation Index Expanded (SCI-EXPANDED)	Environmental Sciences & Ecology	ZD6UR	35093416		2022-05-29	WOS:000758333200007
J	Wang, DL; Bai, YH; Qu, JH		The Phragmites Root-Inhabiting Microbiome: A Critical Review on Its Composition and Environmental Application	ENGINEERING	English	Review	Phragmites; Rhizosphere microbiome; Microbial community composition; Pollution remediation; Constructed wetlands	As widespread wetland plants, Phragmites play a vital role in water purification and are widely utilized in constructed wetlands (accounting for 15.5% of applied wetland plants) as a natural alternative to wastewater treatment. However, despite such common applications, current understanding of the basic composition of the Phragmites root-inhabiting microbiome and the complex functions of each me…	National Natural Science Foun-dation of China [51778603]; Chinese Academy of Sciences [QYZDY-SSW-DQC004]	National Natural Science Foun-dation of China(National Natural Science Foundation of China (NSFC)); Chinese Academy of Sciences(Chinese Academy of Sciences)	116	1	1	2	2	ELSEVIER	AMSTERDAM	ENGINEERING-PRC	FEB	2022	9		42	50		10.1016/j.eng.2021.05.016		9	Engineering, Multidisciplinary	Science Citation Index Expanded (SCI-EXPANDED)	Engineering	0Z7PP		gold	2022-05-29	WOS:000791266000010
J	Zhu, SQ; Liu, J; Han, B; Zhao, WP; Zhou, BH; Zhao, J; Wang, HW		Fluoride exposure cause colon microbiota dysbiosis by destroyed microenvironment and disturbed antimicrobial peptides expression in colon	ENVIRONMENTAL POLLUTION	English	Article	Fluoride; Gut microbiota; Antimicrobial peptides; Intestinal toxicity; Colon	Colon microenvironment and microbiota dysbiosis are closely related to various human metabolic diseases. In this study, a total of 72 healthy female mice were exposed to fluoride (F) (0, 25, 50 and 100 mg/L F-) in drinking water for 70 days. The effect of F on intestinal barrier and the diversity and composition in colon microbiota have been evaluated. Meanwhile, the relationship among F-induced …			50	0	0	8	14	ELSEVIER SCI LTD	OXFORD	ENVIRON POLLUT	2022-01-01	2022	292				118381	10.1016/j.envpol.2021.118381		10	Environmental Sciences	Science Citation Index Expanded (SCI-EXPANDED)	Environmental Sciences & Ecology	WN3NA	34673156		2022-05-29	WOS:000711677600004
J	Di Martino, L; De Salvo, C; Buela, KA; Hager, C; Ghannoum, M; Osme, A; Butto, L; Bamias, G; Pizarro, TT; Cominelli, F		Candida tropicalis Infection Modulates the Gut Microbiome and Confers Enhanced Susceptibility to Colitis in Mice	CELLULAR AND MOLECULAR GASTROENTEROLOGY AND HEPATOLOGY	English	Article	C tropicalis; Colitis; A muciniphila; Mycobiome	BACKGROUND & AIMS: We previously showed that abundance of Candida tropicalis is significantly greater in Crohn's disease patients compared with first-degree relatives without Crohn's disease. The aim of this study was to determine the effects and mechanisms of action of C tropicalis infection on intestinal inflammation and injury in mice. METHODS: C57BL/6 mice were inoculated with C tropicalis, a…	National Institutes of Health [DK042191, DK055812, DK091222, DK097948, DK125526, R01AI145289-01A1]	National Institutes of Health(United States Department of Health & Human ServicesNational Institutes of Health (NIH) - USA)	70	0	0	2	2	ELSEVIER INC	SAN DIEGO	CELL MOL GASTROENTER		2022	13	3	901	923		10.1016/j.jcmgh.2021.11.008		23	Gastroenterology & Hepatology	Science Citation Index Expanded (SCI-EXPANDED)	Gastroenterology & Hepatology	ZG6IU	34890843	gold, Green Published	2022-05-29	WOS:000760361100008
J	Su, H; Wang, WJ; Zheng, GD; Yin, ZP; Li, JE; Chen, LL; Zhang, QF		The anti-obesity and gut microbiota modulating effects of taxifolin in C57BL/6J mice fed with a high-fat diet	JOURNAL OF THE SCIENCE OF FOOD AND AGRICULTURE	English	Article	taxifolin; obesity; gut microbiota; insulin resistance	BACKGROUND Taxifolin is a natural dihydroflavonol found in many plants and health products. In the present study, its anti-obesity and gut microbiota modulating effects were studied. C57BL/6J mice were fed with a high-fat diet (HFD) supplemented with taxifolin (0, 0.5 and 1 mg mL(-1), respectively) in drinking water for 15 weeks. RESULTS Taxifolin supplementation showed no influence on food and w…	National Natural Science Foundation of China [32060541]	National Natural Science Foundation of China(National Natural Science Foundation of China (NSFC))	41	2	2	9	19	WILEY	HOBOKEN	J SCI FOOD AGR	2022-03-15	2022	102	4	1598	1608		10.1002/jsfa.11496		11	Agriculture, Multidisciplinary; Chemistry, Applied; Food Science & Technology	Science Citation Index Expanded (SCI-EXPANDED)	Agriculture; Chemistry; Food Science & Technology	YW7MP	34409603		2022-05-29	WOS:000690675200001
J	Lysko, SB; Baturina, OA; Naumova, NB; Lescheva, NA; Pleshakova, VI; Kabilov, MR		No-Antibiotic-Pectin-Based Treatment Differently Modified Cloaca Bacteriobiome of Male and Female Broiler Chickens	AGRICULTURE-BASEL	English	Article	16S rRNA gene; amplicon sequencing; chicken; prebiotic; gut microbiome	As the information about the effect of pectin prebiotics on chicken gut microbiota is scarce, by using high throughput metagenomic sequencing with Illumina Miseq we examined the cloaca bacteriobiome of male and female chickens receiving antibiotic- or pectin-containing drinking water. The bacteriobiome was dominated by two phyla (Firmicutes and Proteobacteria) and three classes (Clostridia, Bacil…	Ministry of Science and Higher Education of the Russian Federation [075-15-2021-1085]	Ministry of Science and Higher Education of the Russian Federation	67	0	0	5	5	MDPI	BASEL	AGRICULTURE-BASEL	JAN	2022	12	1			24	10.3390/agriculture12010024		16	Agronomy	Science Citation Index Expanded (SCI-EXPANDED)	Agriculture	ZB6GU		Green Published, gold	2022-05-29	WOS:000756939100001
J	Shin, SJ; Moon, SH; Kim, HJ; Oh, SH; Bae, JM		Oral Microbiome Using Colocasia antiquorum var. esculenta Extract Varnish in a Mouse Model with Oral Gavage of P. gingivalis ATCC 53978	MEDICINA-LITHUANIA	English	Article	oral microbiome; Colocasia antiquorum var; esculenta; P; gingivalis; varnish	Background and Objective: There is increasing interest in preventing periodontitis using natural products. The purpose of this study was to investigate the effect of Colocasia antiquorum var. esculenta (CA) varnish on the oral microbiome and alveolar bone loss in a mouse periodontitis model. Materials and Methods: Antibacterial activity against Porphyromonas gingivalis (P. gingivalis) ATCC 53978 …	National Research Foundation of Korea (NRF); Korea government (MSIT) [2021R1A2C1009204]	National Research Foundation of Korea (NRF)(National Research Foundation of Korea); Korea government (MSIT)(Korean Government)	58	0	0	0	0	MDPI	BASEL	MEDICINA-LITHUANIA	APR	2022	58	4			506	10.3390/medicina58040506		14	Medicine, General & Internal	Science Citation Index Expanded (SCI-EXPANDED)	General & Internal Medicine	0R0YC	35454345	Green Published, gold	2022-05-29	WOS:000785331000001
J	Schreier, J; Karasova, D; Crhanova, M; Rychlik, I; Rautenschlein, S; Jung, A		Influence of lincomycin-spectinomycin treatment on the outcome of Enterococcus cecorum infection and on the cecal microbiota in broilers	GUT PATHOGENS	English	Article	Enterococcus cecorum; Infection; Cecal microbiota; Lincomycin; Spectinomycin; Broilers	Background Enterococcus cecorum (EC) is one of the main reasons for skeletal disease in meat type chickens. Intervention strategies are still rare and focus mainly on early antibiotic treatment of the disease, although there are no data available concerning the effectivity of this procedure. The present study aimed to investigate the effectivity of early lincomycin-spectinomycin treatment during …	Projekt DEAL; QS Fachgesellschaft Geflugel GmbH; Ministry of Education, Youth and Sports of the Czech Republic [CZ.02.1.01/0.0/0.0/16_025/0007404]; Deutsche Forschungsgemeinschaft; University of Veterinary Medicine Hannover, Foundation	Projekt DEAL; QS Fachgesellschaft Geflugel GmbH; Ministry of Education, Youth and Sports of the Czech Republic(Ministry of Education, Youth & Sports - Czech Republic); Deutsche Forschungsgemeinschaft(German Research Foundation (DFG)); University of Veterinary Medicine Hannover, Foundation	58	0	0	0	0	BMC	LONDON	GUT PATHOG	2022-01-04	2022	14	1			3	10.1186/s13099-021-00467-9		13	Gastroenterology & Hepatology; Microbiology	Science Citation Index Expanded (SCI-EXPANDED)	Gastroenterology & Hepatology; Microbiology	YA8VE	34983636	Green Published, gold	2022-05-29	WOS:000738603200003
J	Xia, YM; Kuda, T; Nakamura, S; Takahashi, H; Kimura, B		Detection of low-mineral- and high-salt responsible caecal indigenous bacteria in ICR mice	3 BIOTECH	English	Article	Gut microbiome; Mineral; Salt; Mouse	Both deficiency and overdose of minerals and salts negatively affect health. Changes in the dietary composition have immediate effects on the gut microbiota. This study was performed to clarify the presence of indigenous gut bacteria responsible for minerals and/or salts (MS-RIB). ICR mice were fed a diet containing 3.5% (w/w) mineral mix (control), 1% mineral mix (LM), or 3.5% mineral mix and 4%…	Salt Science Research Foundation, Tokyo, Japan	Salt Science Research Foundation, Tokyo, Japan	46	0	0	2	2	SPRINGER HEIDELBERG	HEIDELBERG	3 BIOTECH	MAR	2022	12	3			59	10.1007/s13205-022-03127-0		8	Biotechnology & Applied Microbiology	Science Citation Index Expanded (SCI-EXPANDED)	Biotechnology & Applied Microbiology	YT8MM	35186656		2022-05-29	WOS:000751607200001
J	Guo, YJ; Wang, ZY; Wang, YS; Chen, B; Huang, YQ; Li, P; Tan, Q; Zhang, HY; Chen, W		Impact of drinking water supplemented 2-hydroxy-4-methylthiobutyric acid in combination with acidifier on performance, intestinal development, and microflora in broilers	POULTRY SCIENCE	English	Article	HMTBa and acids; performance; intestinal development; broiler	In addition to offering methionine, 2-hydroxy-4-methylthiobutyric acid (HMTBa) is also an organic acid and shows excellent bacteriostasis. Therefore, 3 experiments were conducted to determine the influence of drinking water supplemented HMTBa in combination with acidifier on performance, intestinal development, and microflora in broilers. The addition of different concentration (0.02-0.20%) of th…	National Natural Science Foundation of China [32072748]; Innovative Leading Talents Project of Zhengzhou [201845]	National Natural Science Foundation of China(National Natural Science Foundation of China (NSFC)); Innovative Leading Talents Project of Zhengzhou	41	0	0	13	13	ELSEVIER	AMSTERDAM	POULTRY SCI	MAR	2022	101	3			101661	10.1016/j.psj.2021.101661		13	Agriculture, Dairy & Animal Science	Science Citation Index Expanded (SCI-EXPANDED)	Agriculture	YL6ED	35042180	Green Published, gold	2022-05-29	WOS:000745981500022
J	Lee, JG; Lee, J; Lee, AR; Jo, SV; Park, CH; Han, DS; Eun, CS		Impact of short-chain fatty acid supplementation on gut inflammation and microbiota composition in a murine colitis model	JOURNAL OF NUTRITIONAL BIOCHEMISTRY	English	Article	Short-chain fatty acids; Butyrates; Inflammatory bowel disease; Colitis; Gut microbiota	Short-chain fatty acids (SCFAs) play a pivotal role in maintaining intestinal homeostasis. We aimed to investigate the effects of SCFA supplementation on gut inflammation and microbiota composition in a murine colitis model. Mice were fed with sodium butyrate or a mixture of SCFAs in the drinking water for 2 weeks, followed by 2% dextran sulfate sodium (DSS) for 7 d. After euthanasia, mouse colon…	National Research Foundation of Korea (NRF) - Korea government (MSIT) [2020R1F1A1067610]	National Research Foundation of Korea (NRF) - Korea government (MSIT)(National Research Foundation of Korea)	49	0	0	19	19	ELSEVIER SCIENCE INC	NEW YORK	J NUTR BIOCHEM	MAR	2022	101				108926	10.1016/j.jnutbio.2021.108926		9	Biochemistry & Molecular Biology; Nutrition & Dietetics	Science Citation Index Expanded (SCI-EXPANDED)	Biochemistry & Molecular Biology; Nutrition & Dietetics	YI3QY	34848335	hybrid	2022-05-29	WOS:000743767400003
J	Simonova, MP; Chrastinova, L; Scerbova, J; Fockova, V; Placha, I; Formelova, Z; Chrenkova, M; Laukova, A		Preventive Potential of Dipeptide Enterocin A/P on Rabbit Health and Its Effect on Growth, Microbiota, and Immune Response	ANIMALS	English	Article	enterocin; rabbit; health; immunity; microbiota; prevention	Simple Summary Rabbits are animals sensitive to alimentary disturbances and various spoilage agents, mostly during the weaning period. For this reason, the use of natural feed additives has become an area of research in rabbit nutrition, mainly with a focus on prevention. The in vivo administration of bacteriocins/enterocins shows an increasing potential in the prevention/treatment of animals' di…	Scientific Grant Agency of the Ministry for Education, Science, Research and Sport of the Slovak Republic; Slovak Academy of Sciences VEGA [2/0005/21]	Scientific Grant Agency of the Ministry for Education, Science, Research and Sport of the Slovak Republic; Slovak Academy of Sciences VEGA(Vedecka grantova agentura MSVVaS SR a SAV (VEGA))	46	0	0	0	0	MDPI	BASEL	ANIMALS-BASEL	MAY	2022	12	9			1108	10.3390/ani12091108		11	Agriculture, Dairy & Animal Science; Veterinary Sciences; Zoology	Science Citation Index Expanded (SCI-EXPANDED)	Agriculture; Veterinary Sciences; Zoology	1E9XJ	35565535	gold, Green Published	2022-05-29	WOS:000794831400001
J	Nouri, Z; Zhang, XY; Khakisahneh, S; Degen, AA; Wang, DH		The microbiota-gut-kidney axis mediates host osmoregulation in a small desert mammal	NPJ BIOFILMS AND MICROBIOMES	English	Article		Regulating sodium and water balances is crucial for survival of small, desert mammals. Studies demonstrate that the gut microbiota and their metabolites are involved in host energy homeostasis, but little is known on the interactions among salt loading, gut microbiota, and osmoregulation. The aim of this study was to fill this gap. Mongolian gerbils (Meriones unguiculatus) were offered drinking w…	National Natural Science Foundation of China [32090020, 32070449]; Strategic Priority Research Program of Chinese Academy of Sciences [XDPB16]; CAS-TWAS Scholarship program for international students	National Natural Science Foundation of China(National Natural Science Foundation of China (NSFC)); Strategic Priority Research Program of Chinese Academy of Sciences(Chinese Academy of Sciences); CAS-TWAS Scholarship program for international students	44	1	1	5	5	NATURE PORTFOLIO	BERLIN	NPJ BIOFILMS MICROBI	2022-04-04	2022	8	1			16	10.1038/s41522-022-00280-5		10	Biotechnology & Applied Microbiology; Microbiology	Science Citation Index Expanded (SCI-EXPANDED)	Biotechnology & Applied Microbiology; Microbiology	0G5YX	35379849	gold, Green Published	2022-05-29	WOS:000778121600002
J	Zhao, JJ; Gomes, D; Jin, LX; Mathis, SP; Li, XH; Rouchka, EC; Bodduluri, H; Conklin, DJ; O'Toole, TE		Polystyrene bead ingestion promotes adiposity and cardiometabolic disease in mice	ECOTOXICOLOGY AND ENVIRONMENTAL SAFETY	English	Article	Microplastics; Polystyrene; Cardiometabolic disease; Obesity; Gut microbiome	Vast amounts of plastic materials are produced in the modern world and despite recycling efforts, large amounts are disposed in water systems and landfills. Under these storage conditions, physical weathering and photochemical processes break down these materials into smaller particles of the micro- and nano-scale. In addition, ecosystems can be contaminated with plastic particles which are manuf…	National Institutes of Health [R01ES019217, P30ES030283, P30GM127607, P20GM103436]; NIH/NIGMS CoBRE [P20GM125504-01]; Jewish Heritage Fund for Excellence [19654]	National Institutes of Health(United States Department of Health & Human ServicesNational Institutes of Health (NIH) - USA); NIH/NIGMS CoBRE; Jewish Heritage Fund for Excellence	45	0	0	14	14	ACADEMIC PRESS INC ELSEVIER SCIENCE	SAN DIEGO	ECOTOX ENVIRON SAFE	2022-03-01	2022	232				113239	10.1016/j.ecoenv.2022.113239		9	Environmental Sciences; Toxicology	Science Citation Index Expanded (SCI-EXPANDED)	Environmental Sciences & Ecology; Toxicology	0N6QF	35093814	gold	2022-05-29	WOS:000782959200006
J	Li, HL; Wei, YY; Li, XH; Zhang, SS; Zhang, RT; Li, JH; Ma, BW; Shao, SB; Lv, ZW; Ruan, H; Zhou, HG; Yang, C		Diosmetin has therapeutic efficacy in colitis regulating gut microbiota, inflammation, and oxidative stress via the circ-Sirt1/Sirt1 axis	ACTA PHARMACOLOGICA SINICA	English	Article	inflammatory bowel disease; colitis; diosmetin; proinflammatory cytokines; oxidative stress; gut microbiota	Diosmetin (3',5,7 -trihydroxy-4'-methoxy flavone) is a natural flavonoid compound in the citrus species, it exhibits a variety of pharmacological activities, but little is known of its effects on colitis. In this study we evaluated the therapeutic effects of diosmetin on mouse models of chronic and acute colitis. Chronic colitis was induced in mice by drinking water containing 3% dextran sulfate …	National Natural Science Foundation of China [82070060, 82072660]; Foundation of Tianjin Pharmaceutical Group Co., Ltd [735-F1025301]	National Natural Science Foundation of China(National Natural Science Foundation of China (NSFC)); Foundation of Tianjin Pharmaceutical Group Co., Ltd	67	2	2	8	14	NATURE PUBL GROUP	LONDON	ACTA PHARMACOL SIN	APR	2022	43	4	919	932		10.1038/s41401-021-00726-0		14	Chemistry, Multidisciplinary; Pharmacology & Pharmacy	Science Citation Index Expanded (SCI-EXPANDED)	Chemistry; Pharmacology & Pharmacy	0F2KG	34262136		2022-05-29	WOS:000673469400001
J	Shi, YH; Li, DZ; Xiao, LW; Sheerin, ED; Mullarkey, D; Yang, LM; Bai, X; Shvets, IV; Boland, JJ; Wang, JJ		The influence of drinking water constituents on the level of microplastic release from plastic kettles	JOURNAL OF HAZARDOUS MATERIALS	English	Article	Microplastics release; Kettles; Water hardness; Ions; Films	Microplastic (MP) release from household plastic products has become a global concern due to the high recorded levels of micmplastic and the direct risk of human exposure. However, the most widely used MP measurement protocol, which involves the use of deionized (DI) water, fails to account for the ions and particles present in real drinking water. In this paper, the influence of typical ions (Ca…	Enterprise Ireland, Ireland [CF20180870]; Science Foundation Ireland, Ireland [20/FIP/PL/8733, 12/RC/2278_P2, 16/IA/4462]; School of Engineering Scholarship at Trinity College Dublin; China Scholarship Council, China [201506210089, 201608300005]; Irish Research Council Laureate Award, Ireland [IRCLA/2019/171]	Enterprise Ireland, Ireland; Science Foundation Ireland, Ireland(Science Foundation Ireland); School of Engineering Scholarship at Trinity College Dublin; China Scholarship Council, China(China Scholarship Council); Irish Research Council Laureate Award, Ireland(Irish Research Council for Science, Engineering and Technology)	39	0	0	32	32	ELSEVIER	AMSTERDAM	J HAZARD MATER	2022-03-05	2022	425				127997	10.1016/j.jhazmat.2021.127997		10	Engineering, Environmental; Environmental Sciences	Science Citation Index Expanded (SCI-EXPANDED)	Engineering; Environmental Sciences & Ecology	XU6LW	34986566	Green Published, hybrid	2022-05-29	WOS:000734374700004
J	Szott, V; Reichelt, B; Friese, A; Roesler, U		A Complex Competitive Exclusion Culture Reduces Campylobacter jejuni Colonization in Broiler Chickens at Slaughter Age In Vivo	VETERINARY SCIENCES	English	Article	Campylobacter; competitive exclusion; CE culture; broiler; control measure; microbiome; intervention strategy	Diminishing Campylobacter prevalence in poultry flocks has proven to be extremely challenging. To date, efficacious control measures to reduce Campylobacter prevalence are still missing. A potential approach to control Campylobacter in modern poultry productions is to occupy its niche in the mucosal layer by administering live intestinal microbiota from adult chickens to dayold-chicks (competitiv…	German Federal Ministry of Education and Research [IP4/01KI1725A]; Freie Universitat Berlin	German Federal Ministry of Education and Research(Federal Ministry of Education & Research (BMBF)); Freie Universitat Berlin	61	0	0	0	0	MDPI	BASEL	VET SCI	APR	2022	9	4			181	10.3390/vetsci9040181		12	Veterinary Sciences	Science Citation Index Expanded (SCI-EXPANDED)	Veterinary Sciences	0Q6MI	35448680	Green Published, gold	2022-05-29	WOS:000785029900001
J	Gobert, AP; Latour, YL; Asim, M; Barry, DP; Allaman, MM; Finley, JL; Smith, TM; McNamara, KM; Singh, K; Sierra, JC; Delgado, AG; Luis, PB; Schneider, C; Washington, MK; Piazuelo, MB; Zhao, S; Coburn, LA; Wilson, KT		Protective Role of Spermidine in Colitis and Colon Carcinogenesis	GASTROENTEROLOGY	English	Article	Inflammatory Bowel Disease; Colitis-Associated Carcinogenesis; Polyamines; Spermidine; a-Defensins; Chemo-prevention; Intestinal Microbiota	BACKGROUND & AIMS: Because inflammatory bowel disease is increasing worldwide and can lead to colitis-associated carcinoma (CAC), new interventions are needed. We have shown that spermine oxidase (SMOX), which generates spermidine (Spd), regulates colitis. Here we determined whether Spd treatment reduces colitis and carcinogenesis. METHODS: SMOX was quantified in human colitis and associated dysp…	National Institutes of Health (NIH) from the National Institute of Diabetes and Digestive and Kidney Diseases [R01DK128200]; National Center for Complementary and Integrative Health [R01AT004821]; National Cancer Institute [R01CA190612, P01CA116087, P01CA028842, P50CA236733]; Veterans Affairs Merit Review grants [I01BX001453, I01CX002171]; Crohn's & Colitis Foundation [703003]; Vanderbilt Center …	National Institutes of Health (NIH) from the National Institute of Diabetes and Digestive and Kidney Diseases; National Center for Complementary and Integrative Health; National Cancer Institute(United States Department of Health & Human ServicesNational Institutes of Health (NIH) - USANIH National Cancer Institute (NCI)); Veterans Affairs Merit Review grants(US Department of Veterans Affairs); C…	0	1	1	5	5	W B SAUNDERS CO-ELSEVIER INC	PHILADELPHIA	GASTROENTEROLOGY	MAR	2022	162	3	813	#ERROR!		10.1053/j.gastro.2021.11.005		23	Gastroenterology & Hepatology	Science Citation Index Expanded (SCI-EXPANDED)	Gastroenterology & Hepatology	1G6CR	34767785	Bronze	2022-05-29	WOS:000795934800021
J	Qiao, HZ; Zhao, TX; Yin, J; Zhang, YC; Ran, HM; Chen, SJ; Wu, ZW; Zhang, R; Wang, XKX; Gan, LP; Wang, JR		Structural Characteristics of Inulin and Microcrystalline Cellulose and Their Effect on Ameliorating Colitis and Altering Colonic Microbiota in Dextran Sodium Sulfate-Induced Colitic Mice	ACS OMEGA	English	Article		Several studies have reported that dietary fibers (DFs) from plants may exert beneficial effects on inflammatory bowel disease. In the present study, we investigated the structural differences of soluble DF (inulin) and insoluble DF (microcrystalline cellulose, MCC) and their effects on the intestinal barrier integrity, gut microbiota community, and inflammation response in mice with dextran sodi…	National Key Research and Development Program of China [2021YFD1300300]; Natural Science Foundation of Henan Province [202300410104]; Innovation Fund of Henan University of Technology [2020ZKCJ25]; High Level Research Fund for Qualified People of Henan University of Technology [2018QNJH16, 31401132]	National Key Research and Development Program of China; Natural Science Foundation of Henan Province; Innovation Fund of Henan University of Technology; High Level Research Fund for Qualified People of Henan University of Technology	69	0	0	8	8	AMER CHEMICAL SOC	WASHINGTON	ACS OMEGA	2022-04-05	2022	7	13	10921	10932		10.1021/acsomega.1c06552		12	Chemistry, Multidisciplinary	Science Citation Index Expanded (SCI-EXPANDED)	Chemistry	0P1NZ	35415348	Green Published	2022-05-29	WOS:000783991200007
J	Hoque, MR; Park, I; Mun, S; Kim, IH		Effect of Detoxified Nano Sulfur Supplementation on the Growth, Nutrient Digestibility, Meat Quality, Excreta Microbes, Gas Emissions, and Blood Profiles of Broilers	JOURNAL OF POULTRY SCIENCE	English	Article	broiler; DSD; excreta microbiota; growth performance; meat quality	A 35-day experiment was conducted to evaluate the effects of the supplementation of mineral detoxified sulfur dispersion ((DSD); Patent No.: 10-1997773) on the growth performance, meat quality, excreta microbiota, gas emissions, nutrient digestibility, and blood profiles of broilers. In total, 720 one-day-old ROSS 308 broilers, with an initial body weight of 41.9 +/- 0.8 g, were divided into two …	Korea Institute of Plan-ning and Evaluation for Technology in Food, Agriculture, and Forestry (IPET) through the Agri-food R&D Perform-ance Follow-up Support Program - Ministry of Agriculture, Food and Rural Affairs (MAFRA) [819107-1]	Korea Institute of Plan-ning and Evaluation for Technology in Food, Agriculture, and Forestry (IPET) through the Agri-food R&D Perform-ance Follow-up Support Program - Ministry of Agriculture, Food and Rural Affairs (MAFRA)	34	0	0	1	1	JAPAN POULTRY SCIENCE ASSOC	TSUKUBA	J POULT SCI	JAN	2022	59	1	48	55		10.2141/jpsa.0200111		8	Agriculture, Dairy & Animal Science	Science Citation Index Expanded (SCI-EXPANDED)	Agriculture	YY8UK	35125912	gold, Green Published	2022-05-29	WOS:000755061100001
J	Ota, T; Ishikawa, T; Sakakida, T; Endo, Y; Matsumura, S; Yoshida, J; Hirai, Y; Mizushima, K; Oka, K; Doi, T; Okayama, T; Inoue, K; Kamada, K; Uchiyama, K; Takagi, T; Konishi, H; Naito, Y; Itoh, Y		Treatment with broad-spectrum antibiotics upregulates Sglt1 and induces small intestinal villous hyperplasia in mice	JOURNAL OF CLINICAL BIOCHEMISTRY AND NUTRITION	English	Article	antibiotics; gut microbiota; SGLT1; intestinal hyperplasia; glucose tolerance	Although extensive evidence indicates that the gut microbiota plays a crucial role in regulating glucose homeostasis, the exact regulatory mechanism remains unclear. This study aimed to investigate the effect of broad-spectrum antibiotics on the expression of glucose transporters, histomorphology of the small intestine, and glucose metabolism in mice. C57BL/6 mice were administered drinking water…	JSPS KAKENHI [20K07787, 17K09314]	JSPS KAKENHI(Ministry of Education, Culture, Sports, Science and Technology, Japan (MEXT)Japan Society for the Promotion of ScienceGrants-in-Aid for Scientific Research (KAKENHI))	44	0	0	1	1	JOURNAL CLINICAL BIOCHEMISTRY & NUTRITION	KYOTO	J CLIN BIOCHEM NUTR	JAN	2022	70	1	21	27		10.3164/jcbn.21-42		7	Nutrition & Dietetics	Science Citation Index Expanded (SCI-EXPANDED)	Nutrition & Dietetics	ZK6MV	35068677	gold, Green Published	2022-05-29	WOS:000763102700004
J	Amin, MB; Hoque, KI; Roy, S; Saha, SR; Islam, MR; Julian, TR; Islam, MA		Identifying the Sources of Intestinal Colonization With Extended-Spectrum beta-Lactamase-Producing Escherichia coli in Healthy Infants in the Community	FRONTIERS IN MICROBIOLOGY	English	Article	antibiotic resistance; transmission; colonization; whole genome sequencing; E; coli; ESBL; children; drinking water	The prevalence of fecal colonization with extended-spectrum beta-lactamase-producing Escherichia coli (ESBL-Ec) among children in low- and middle-income countries is alarmingly high. This study aimed to identify the sources of ESBL-Ec colonization in children < 1 year old through comparative analysis of E. coli isolates from child stool, child's mother stool, and point-of-use drinking water from …	REACH catalyst grant, UK [GR-01507]	REACH catalyst grant, UK	73	0	0	0	0	FRONTIERS MEDIA SA	LAUSANNE	FRONT MICROBIOL	2022-03-31	2022	13				803043	10.3389/fmicb.2022.803043		12	Microbiology	Science Citation Index Expanded (SCI-EXPANDED)	Microbiology	0V9BG	35432268	Green Published, gold	2022-05-29	WOS:000788633100001
J	Hao, Y; Meng, L; Zhang, Y; Chen, AX; Zhao, Y; Lian, KQ; Guo, XF; Wang, XH; Du, YR; Wang, X; Li, XZ; Song, L; Shi, Y; Yin, X; Gong, M; Shi, HS		Effects of chronic triclosan exposure on social behaviors in adult mice	JOURNAL OF HAZARDOUS MATERIALS	English	Article	TCS; social dominance; memory formation; hippocampus; synaptic plasticity; gut microbiota	Triclosan (TCS), a newly identified environmental endocrine disruptor (EED) in household products, has been reported to have toxic effects on animals and humans. The effects of TCS exposure on individual social behaviors and the potential underlying mechanisms are still unknown. This study investigated the behavioral effects of 42day exposure to TCS (0, 50, 100 mg/kg) in drinking water using the …	National Natural Science Foundation of China [82171536, 81771462, 81800742]; Natural Science Foundation of Hebei Province [H2018206119, A201802022]; CAMS Innovation Fund for Medical Sciences [2019-I2M-5-055]; Science and Technology Research Foundation for Colleges and Universities of Hebei Province [QN2017102]; Special Foundation for Excellent Undergraduate Students from Hebei Medical University …	National Natural Science Foundation of China(National Natural Science Foundation of China (NSFC)); Natural Science Foundation of Hebei Province(Natural Science Foundation of Hebei Province); CAMS Innovation Fund for Medical Sciences; Science and Technology Research Foundation for Colleges and Universities of Hebei Province; Special Foundation for Excellent Undergraduate Students from Hebei Medica…	74	1	1	16	17	ELSEVIER	AMSTERDAM	J HAZARD MATER	2022-02-15	2022	424				127562	10.1016/j.jhazmat.2021.127562		10	Engineering, Environmental; Environmental Sciences	Science Citation Index Expanded (SCI-EXPANDED)	Engineering; Environmental Sciences & Ecology	WZ4MR	34736200		2022-05-29	WOS:000719943700004
J	Dong, SS; Xin, ZL; He, WC; Zhang, YL; Xiong, JQ; Wang, J; Liao, ZL; Wang, L; Zhong, QP; Wei, H; Fang, X		Correlation between the regulation of intestinal bacteriophages by green tea polyphenols and the flora diversity in SPF mice	FOOD & FUNCTION	English	Article		Green tea polyphenols (GTP) play an important role in shaping the gut microbiome, comprising a range of densely colonizing microorganisms, including bacteriophages. Previous studies focused on the effect of GTP on the bacteria in the gut microbiota. However, little is known about the role of GTP in the bacteriophage composition of healthy intestines. In this study, SPF male C57BL/6J mice were div…	National Natural Science Foundation of China [31871790, 31671855, 81770434]; National Key Research and Development Program of China [2018YFC1313802]; Key-Area Research and Development Program of Guangdong Province [2018B020205002]; International Training Program for Outstanding Young Scientists in Universities in Guangdong Province [2020YQGP_BS008]	National Natural Science Foundation of China(National Natural Science Foundation of China (NSFC)); National Key Research and Development Program of China; Key-Area Research and Development Program of Guangdong Province; International Training Program for Outstanding Young Scientists in Universities in Guangdong Province	73	1	1	12	12	ROYAL SOC CHEMISTRY	CAMBRIDGE	FOOD FUNCT	2022-03-07	2022	13	5	2952	2965		10.1039/d1fo03694g		14	Biochemistry & Molecular Biology; Food Science & Technology	Science Citation Index Expanded (SCI-EXPANDED)	Biochemistry & Molecular Biology; Food Science & Technology	ZO0XX	35191911		2022-05-29	WOS:000759068900001
J	Reyes, RE; Gao, L; Zhang, Z; Davies, DL; Asatryan, L		Supplementation with sodium butyrate protects against antibiotic-induced increases in ethanol consumption behavior in mice	ALCOHOL	English	Article	antibiotic and sodium butyrate; supplementation; ethanol intake and preference; gut-brain axis; gut microbiota diversity; short-chain fatty acids	Background: We have recently reported that oral treatment of adult male C57BL/6J mice with a non absorbable antibiotic cocktail resulted in an increase in ethanol intake and in significant reductions in butyrate-producing gut microbiota populations. This work led us to hypothesize that reduction in butyrate levels within the gut is linked to antibiotic-induced increases in voluntary ethanol consu…	Rose Hills Foundation Innovator Award (USC); NIAAA [R01AA022448]; USC School of Pharmacy; USC Good Neighbors	Rose Hills Foundation Innovator Award (USC); NIAAA(United States Department of Health & Human ServicesNational Institutes of Health (NIH) - USANIH National Institute on Alcohol Abuse & Alcoholism (NIAAA)); USC School of Pharmacy; USC Good Neighbors	39	1	1	3	3	ELSEVIER SCIENCE INC	NEW YORK	ALCOHOL	MAY	2022	100		1	9		10.1016/j.alcohol.2021.12.003		9	Substance Abuse; Pharmacology & Pharmacy; Toxicology	Science Citation Index Expanded (SCI-EXPANDED)	Substance Abuse; Pharmacology & Pharmacy; Toxicology	1C6LV	34999234		2022-05-29	WOS:000793229000001
J	Gangaiah, D; Ryan, V; Van Hoesel, D; Mane, SP; Mckinley, ET; Lakshmanan, N; Reddy, ND; Dolk, E; Kumar, A		Recombinant Limosilactobacillus (Lactobacillus) delivering nanobodies against Clostridium perfringens NetB and alpha toxin confers potential protection from necrotic enteritis	MICROBIOLOGYOPEN	English	Article	Limosilactobacillus; nanobodies; necrotic enteritis; poultry	Necrotic enteritis (NE), caused by Clostridium perfringens, is an intestinal disease with devastating economic losses to the poultry industry. NE is a complex disease and predisposing factors that compromise gut integrity are required to facilitate C. perfringens proliferation and toxin production. NE is also characterized by drastic shifts in gut microbiota; C. perfringens is negatively correlat…			121	0	0	3	3	WILEY	HOBOKEN	MICROBIOLOGYOPEN	APR	2022	11	2			e1270	10.1002/mbo3.1270		37	Microbiology	Science Citation Index Expanded (SCI-EXPANDED)	Microbiology	0E2KH	35478283	Green Published, Green Submitted	2022-05-29	WOS:000776512300001
J	Rawle, DJ; Dumenil, T; Tang, B; Bishop, CR; Yan, KX; Le, TT; Suhrbier, A		Microplastic consumption induces inflammatory signatures in the colon and prolongs a viral arthritis	SCIENCE OF THE TOTAL ENVIRONMENT	English	Article	Microplastics; Chikungunya virus; Enteropathic arthritis; Microbiome; Innate lymphoid cells; RNA-Seq; Inflammation; Mouse	Global microplastic (MP) contamination and the effects on the environment are well described. However, the potential for MP consumption to affect human health remains controversial. Mice consuming approximate to 80 mu g/kg/day of 1 mu m polystyrene MPs via their drinking water showed no weight loss, nor were MPs detected in internal organs. The microbiome was also not significantly changed. MP co…	National Health and Medical Research Council (NHMRC) of Australia [APP1173880]	National Health and Medical Research Council (NHMRC) of Australia(National Health and Medical Research Council (NHMRC) of Australia)	207	0	0	29	29	ELSEVIER	AMSTERDAM	SCI TOTAL ENVIRON	2022-02-25	2022	809				152212	10.1016/j.scitotenv.2021.152212		17	Environmental Sciences	Science Citation Index Expanded (SCI-EXPANDED)	Environmental Sciences & Ecology	YY8SF	34890673	hybrid, Green Submitted	2022-05-29	WOS:000755055100012
J	Wang, T; Zhang, LS; Wang, PP; Liu, YL; Wang, GT; Shan, YY; Yi, YL; Zhou, Y; Liu, BF; Wang, X; Lu, X		Lactobacillus coryniformis MXJ32 administration ameliorates azoxymethane/dextran sulfate sodium-induced colitis-associated colorectal cancer via reshaping intestinal microenvironment and alleviating inflammatory response	EUROPEAN JOURNAL OF NUTRITION	English	Article	Lactobacillus coryniformis; Colorectal cancer; Gut microbiota; Inflammation; Intestinal permeability	Purpose Gut microbiota has been reported to contribute to either prevent or promote colorectal cancer (CRC), and treatment with probiotics might be a promising intervention method. The present study aimed to evaluate the potential anti-CRC effects of Lactobacillus coryniformis MXJ32 on a colitis-associated (CA)-CRC mouse model. Methods The CA-CRC mouse model was induced by a single intraperitonea…	Northwest AF University [Z109021804]; National Natural Science Foundation of China [31972043, 32001652]	Northwest AF University; National Natural Science Foundation of China(National Natural Science Foundation of China (NSFC))	47	5	5	19	33	SPRINGER HEIDELBERG	HEIDELBERG	EUR J NUTR	FEB	2022	61	1	85	99		10.1007/s00394-021-02627-8		15	Nutrition & Dietetics	Science Citation Index Expanded (SCI-EXPANDED)	Nutrition & Dietetics	YL0UA	34185157		2022-05-29	WOS:000668031500001
J	Kye, YJ; Lee, SY; Kim, HR; Lee, BH; Park, MS; Ji, GE; Sung, MK		Lactobacillus acidophilus PIN7 paraprobiotic supplementation ameliorates DSS-induced colitis through anti-inflammatory and immune regulatory effects	JOURNAL OF APPLIED MICROBIOLOGY	English	Article	inflammatory bowel diseases; Lactobacillus acidophilus PIN7; microbiota; paraprobiotic; TLR	Aims This study aimed to evaluate the efficacy of paraprobiotics Lactobacillus acidophilus PIN7 supplementation against dextran sodium sulphate (DSS)-induced colitis in mice and to determine their mechanisms of the action. Methods and Results Ten-week-old female BALB/C mice were randomly divided into five groups. Each group was administered with PBS (control and DSS group), live PIN7 (LIVE group)…	Korea Institute of Planning and Evaluation for Technology in Food, Agriculture and Forestry; Ministry of Agriculture, Food and Rural Affairs [317043-03-2-HD 030]; Medical Research Center Program through National Research Foundation (NRF) [2011-0030074]	Korea Institute of Planning and Evaluation for Technology in Food, Agriculture and Forestry; Ministry of Agriculture, Food and Rural Affairs; Medical Research Center Program through National Research Foundation (NRF)	42	0	0	10	10	WILEY	HOBOKEN	J APPL MICROBIOL	APR	2022	132	4	3189	3200		10.1111/jam.15406		12	Biotechnology & Applied Microbiology; Microbiology	Science Citation Index Expanded (SCI-EXPANDED)	Biotechnology & Applied Microbiology; Microbiology	0A6MB	34878713		2022-05-29	WOS:000734114600001
J	Qian, KY; Chen, SJ; Wang, JC; Sheng, KL; Wang, YZ; Zhang, M		A beta-N-acetylhexosaminidase Amuc_2109 from Akkermansia muciniphila protects against dextran sulfate sodium-induced colitis in mice by enhancing intestinal barrier and modulating gut microbiota	FOOD & FUNCTION	English	Article		Inflammatory bowel disease (IBD) is associated with the microbial composition of the gut and its metabolites. Akkermansia muciniphila is a probiotic that exerts a significant alleviative or therapeutic effect on host enteritis. This study was designed to determine the protective effect and potential mechanism underlying the secretion of beta-acetylaminohexosidase (Amuc_2109) by A. muciniphila aga…	Key Research Program of the Education Department of Anhui Province [KJ2019ZD02]	Key Research Program of the Education Department of Anhui Province	53	0	0	25	25	ROYAL SOC CHEMISTRY	CAMBRIDGE	FOOD FUNCT	2022-02-21	2022	13	4	2216	2227		10.1039/d1fo04094d		12	Biochemistry & Molecular Biology; Food Science & Technology	Science Citation Index Expanded (SCI-EXPANDED)	Biochemistry & Molecular Biology; Food Science & Technology	ZD5XJ	35133390		2022-05-29	WOS:000752514700001
J	Fu, SZ; Yang, Q; Sheng, YJ; Wang, QY; Wu, JM; Qiu, ZG; Lan, RT; Wang, YJ; Liu, Y		Metagenomics combined with comprehensive validation as a public health risk assessment tool for urban and agricultural run-off	WATER RESEARCH	English	Article	Metagenomic sequencing; Wastewater surveillance; MLST; Virulence; Public health risk; Pathogen genotyping	Early detection of emerging and life-threatening pathogens circulating in complex environments is urgently required to combat infectious diseases. This study proposed a public health risk assessment workflow with three stages, pathogen screening, pathogen genotyping, and risk assessment. In stage one, pathogens were screened with metagenomic sequencing, microfluidic chip, and qPCR. In stage two, …	National Natural Science Foundation of China [81903372, 41876195]; Key R&D Program of Guangdong Province [2019B020215001]; Science & Technology Program of Liaoning Province [2019JH2/10200007]	National Natural Science Foundation of China(National Natural Science Foundation of China (NSFC)); Key R&D Program of Guangdong Province; Science & Technology Program of Liaoning Province	52	0	0	18	18	PERGAMON-ELSEVIER SCIENCE LTD	OXFORD	WATER RES	2022-02-01	2022	209				117941	10.1016/j.watres.2021.117941		13	Engineering, Environmental; Environmental Sciences; Water Resources	Science Citation Index Expanded (SCI-EXPANDED)	Engineering; Environmental Sciences & Ecology; Water Resources	ZE1FC	34920315		2022-05-29	WOS:000758635200010
J	Ding, QC; Guo, R; Pei, LH; Lai, SL; Li, JM; Yin, YJ; Xu, TT; Yang, WW; Song, Q; Han, Q; Dou, XB; Li, ST		N-Acetylcysteine alleviates high fat diet-induced hepatic steatosis and liver injury via regulating the intestinal microecology in mice	FOOD & FUNCTION	English	Article		N-Acetylcysteine (NAC), a well-accepted antioxidant, has been shown to protect against high fat diet (HFD)-induced obesity-associated non-alcoholic fatty liver disease (NAFLD) in mice. However, the underlying mechanism(s) of the beneficial role of NAC is still not fully understood. Our study aimed to evaluate the protective effect of NAC against NAFLD in terms of gut microbiota homeostasis. Thirt…	Natural Science Foundation of China [81973041]; Zhejiang Natural Science Foundation for Distinguished Young Scholars [LR20H260001]; Special Support Program for High Level Talents in Zhejiang Province [ZJWR0308092]; Research Project of Zhejiang Chinese Medical University [2021JKZDZC08]	Natural Science Foundation of China(National Natural Science Foundation of China (NSFC)); Zhejiang Natural Science Foundation for Distinguished Young Scholars; Special Support Program for High Level Talents in Zhejiang Province; Research Project of Zhejiang Chinese Medical University	57	0	0	16	16	ROYAL SOC CHEMISTRY	CAMBRIDGE	FOOD FUNCT	2022-03-21	2022	13	6	3368	3380		10.1039/d1fo03952k		13	Biochemistry & Molecular Biology; Food Science & Technology	Science Citation Index Expanded (SCI-EXPANDED)	Biochemistry & Molecular Biology; Food Science & Technology	ZW3AA	35229847		2022-05-29	WOS:000762394800001
J	Hsu, CN; Hou, CY; Chang, CI; Tain, YL		Resveratrol Butyrate Ester Protects Adenine-Treated Rats against Hypertension and Kidney Disease by Regulating the Gut-Kidney Axis	ANTIOXIDANTS	English	Article	chronic kidney disease; aryl hydrocarbon receptor; butyrate; developmental origins of health and disease (DOHaD); hypertension; gut microbiota; resveratrol; short chain fatty acid	Despite recent advances in pharma-nutritional management, chronic kidney disease (CKD) remains an increasingly prevalent disorder. Resveratrol, a pleiotropic phytochemical, has been found to reduce the risk for several chronic diseases. Considering the low bioavailability of resveratrol, we recently synthesized resveratrol butyrate ester (RBE) via the esterification of resveratrol with butyrate. …	Kaohsiung Chang Gung Memorial Hospital, Kaohsiung, Taiwan [CORPG8L0301]; National Pingtung University of Science and Technology, Pingtung, Taiwan	Kaohsiung Chang Gung Memorial Hospital, Kaohsiung, Taiwan; National Pingtung University of Science and Technology, Pingtung, Taiwan	36	2	2	5	5	MDPI	BASEL	ANTIOXIDANTS-BASEL	JAN	2022	11	1			83	10.3390/antiox11010083		14	Biochemistry & Molecular Biology; Chemistry, Medicinal; Food Science & Technology	Science Citation Index Expanded (SCI-EXPANDED)	Biochemistry & Molecular Biology; Pharmacology & Pharmacy; Food Science & Technology	YN8PY	35052587	Green Published, gold	2022-05-29	WOS:000747515800001
J	Liu, HY; Gu, F; Zhu, CP; Yuan, L; Zhu, CY; Zhu, MA; Yao, JC; Hu, P; Zhang, YZ; Dicksved, J; Bao, WB; Cai, DM		Epithelial Heat Shock Proteins Mediate the Protective Effects of Limosilactobacillus reuteri in Dextran Sulfate Sodium-Induced Colitis	FRONTIERS IN IMMUNOLOGY	English	Article	inflammatory bowel disease; barrier function; heat shock proteins; probiotics; gut microbiota	Defects in gut barrier function are implicated in gastrointestinal (GI) disorders like inflammatory bowel disease (IBD), as well as in systemic inflammation. With the increasing incidence of IBD worldwide, more attention should be paid to dietary interventions and therapeutics with the potential to boost the natural defense mechanisms of gut epithelial cells. The current study aimed to investigat…	National Natural Science Foundation of China [32002243]; Natural Science Foundation of Jiangsu Province [BK20200932]; Natural Science Foundation of the Higher Education Institutions of Jiangsu Province [20KJB230001]; Priority Academic Program Development of Jiangsu Higher Education Institutions (PAPD)	National Natural Science Foundation of China(National Natural Science Foundation of China (NSFC)); Natural Science Foundation of Jiangsu Province(Natural Science Foundation of Jiangsu Province); Natural Science Foundation of the Higher Education Institutions of Jiangsu Province; Priority Academic Program Development of Jiangsu Higher Education Institutions (PAPD)	40	0	0	1	1	FRONTIERS MEDIA SA	LAUSANNE	FRONT IMMUNOL	2022-03-07	2022	13				865982	10.3389/fimmu.2022.865982		15	Immunology	Science Citation Index Expanded (SCI-EXPANDED)	Immunology	ZY5CC	35320932	gold, Green Published	2022-05-29	WOS:000772603300001
J	Xia, PK; Hou, T; Ma, MY; Li, S; Jin, H; Luo, X; Li, J; Geng, F; Li, B		Konjac oligosaccharides attenuate DSS-induced ulcerative colitis in mice: mechanistic insights	FOOD & FUNCTION	English	Article		This study aims to explore the protective effect of konjac oligosaccharides (KOS) on inflammatory bowel disease in colitis mice. During the experimental period, mice were administered 200 mg kg(-1) or 600 mg kg(-1) KOS, 200 mg kg(-1) sulfasalazine and a combination of KOS and sulfasalazine for 14 days. The mice were then treated with drinking water containing 2.5% DSS for 9 days, while the interv…	Hubei Provincial Natural Science Foundation for Innovative Group [2019CFA011]; Fundamental Research Funds for the Central Universities [2662020SPPY001]	Hubei Provincial Natural Science Foundation for Innovative Group; Fundamental Research Funds for the Central Universities(Fundamental Research Funds for the Central Universities)	61	0	0	8	8	ROYAL SOC CHEMISTRY	CAMBRIDGE	FOOD FUNCT	2022-05-23	2022	13	10	5626	5639		10.1039/d1fo04004a		14	Biochemistry & Molecular Biology; Food Science & Technology	Science Citation Index Expanded (SCI-EXPANDED)	Biochemistry & Molecular Biology; Food Science & Technology	1K8TA	35506498		2022-05-29	WOS:000790384000001
J	di Cesare, A; Riva, F; Colinas, N; Borgomaneiro, G; Borin, S; Cabello-Yeves, PJ; Canale, C; Cedraro, N; Citterio, B; Crotti, E; Mangiaterra, G; Mapelli, F; Mondino, V; Vignaroli, C; Quaranta, W; Corno, G; Fontaneto, D; Eckert, EM		Zooplankton as a Transitional Host for Escherichia coli in Freshwater	APPLIED AND ENVIRONMENTAL MICROBIOLOGY	English	Article	Escherichia coli; Daphnia; fecal indicator bacteria; freshwater; lake; zooplankton	The contamination of freshwater with feces-derived bacteria is a major concern regarding drinking water acquisition and recreational activities. Ecological interactions promoting their persistence are still very scarcely studied. This study, which analyses the survival of E. coli in the presence of zooplankton, is thus of ecological and water safety relevance. This study shows that Escherichia co…	Generalitat Valenciana - International Commission for the Protection of Italian-Swiss Waters (CIPAIS); Cariplo Foundation [2018-0995]	Generalitat Valenciana - International Commission for the Protection of Italian-Swiss Waters (CIPAIS); Cariplo Foundation(Fondazione Cariplo)	90	0	0	2	2	AMER SOC MICROBIOLOGY	WASHINGTON	APPL ENVIRON MICROB	2022-05-10	2022	88	9				10.1128/aem.02522-21		17	Biotechnology & Applied Microbiology; Microbiology	Science Citation Index Expanded (SCI-EXPANDED)	Biotechnology & Applied Microbiology; Microbiology	1I7QD	35416683	Green Submitted, Green Published	2022-05-29	WOS:000784211000005
J	Zhou, Y; Addai, FP; Zhang, XS; Liu, YL; Wang, YF; Lin, F; Tuffour, A; Gu, J; Liu, GX; Shi, HF		Heavy metal-induced lipogenic gene aberration, lipid dysregulation and obesogenic effect: a review	ENVIRONMENTAL CHEMISTRY LETTERS	English	Review	Lipid metabolism; Heavy-metals; Dyslipidemia; Lipogenic genes; Diabetes; Obesity	Lipids are high energy, complex biomolecular compounds essential for cellular and organellar membrane formation. Accumulation of circulatory lipids is however associated with pathophysiological conditions including cardiometabolic disorders, diabetic dyslipidemia and obesity. Epidemiological studies have correlated heavy-metal exposure with dyslipidemias and metabolic syndrome. Here, we review th…	National Natural Science Foundation of China [31301919]; Natural Science Foundation of the Higher Education Institutions of Jiangsu Province [13KJB18005]	National Natural Science Foundation of China(National Natural Science Foundation of China (NSFC)); Natural Science Foundation of the Higher Education Institutions of Jiangsu Province	198	0	0	8	8	SPRINGER HEIDELBERG	HEIDELBERG	ENVIRON CHEM LETT	JUN	2022	20	3	1611	1643		10.1007/s10311-021-01383-9		33	Chemistry, Multidisciplinary; Engineering, Environmental; Environmental Sciences	Science Citation Index Expanded (SCI-EXPANDED)	Chemistry; Engineering; Environmental Sciences & Ecology	1I2EW			2022-05-29	WOS:000761901400001
J	Yancey, CE; Smith, DJ; Den Uyl, PA; Mohamed, OG; Yu, FA; Ruberg, SA; Chaffin, JD; Goodwin, KD; Tripathi, A; Sherman, DH; Dick, GJ		Metagenomic and Metatranscriptomic Insights into Population Diversity of Microcystis Blooms: Spatial and Temporal Dynamics of mcy Genotypes, Including a Partial Operon That Can Be Abundant and Expressed	APPLIED AND ENVIRONMENTAL MICROBIOLOGY	English	Article	freshwater harmful algal blooms; Microcystis; metagenomics; mcy operon; Lake Erie	Cyanobacterial harmful algal blooms (cyanoHABs) degrade freshwater ecosystems globally. Microcystis aeruginosa often dominates cyanoHABs and produces microcystin (MC), a class of hepatotoxins that poses threats to human and animal health. Microcystin toxicity is influenced by distinct structural elements across a diversity of related molecules encoded by variant mcy operons. However, the composit…	NIH [1P01ES028939-01]; NSF [OCE-1840715]; Cooperative Institute of Great Lakes Research [NA17OAR4320152]; NOAA ECOHAB award [NA17NOS4780186]; NOAA OAR Omics; NOAA OAR Ocean Technology Development Initiative	NIH(United States Department of Health & Human ServicesNational Institutes of Health (NIH) - USA); NSF(National Science Foundation (NSF)); Cooperative Institute of Great Lakes Research; NOAA ECOHAB award; NOAA OAR Omics; NOAA OAR Ocean Technology Development Initiative	73	0	0	7	7	AMER SOC MICROBIOLOGY	WASHINGTON	APPL ENVIRON MICROB	2022-05-10	2022	88	9				10.1128/aem.02464-21		17	Biotechnology & Applied Microbiology; Microbiology	Science Citation Index Expanded (SCI-EXPANDED)	Biotechnology & Applied Microbiology; Microbiology	1I7QD	35438519	Green Published, hybrid	2022-05-29	WOS:000784211600001
J	Dong, F; Jiang, S; Tang, C; Wang, XH; Ren, XQ; Wei, QC; Tian, J; Hu, WP; Guo, J; Fu, XD; Liu, LL; Patzak, A; Persson, PB; Gao, F; Lai, EY; Zhao, L		Trimethylamine N-oxide promotes hyperoxaluria-induced calcium oxalate deposition and kidney injury by activating autophagy	FREE RADICAL BIOLOGY AND MEDICINE	English	Article	Hyperoxaluria; Trimethylamine N-Oxide; Oxidative stress; Autophagy; Protein kinase R-like endoplasmic reticulum kinase	Calcium oxalate (CaOx) is the most common component of kidney stones. Oxidative stress, inflammation and autophagy-induced cell death are the major causes of CaOx crystal deposition and CaOx crystal deposition can further lead to kidney injury. Trimethylamine N-oxide (TMAO), a gut microbiota-derived metabolite, plays an important role in the pathogenesis of many diseases, such as atherosclerosis,…	Deutsche Forschungsgemeinschaft (German Research Foundation) [394046635-SFB 1365]; National Natural Foundation of China [82073332]; Medical scientific research foundation of Guangdong province [A2018071]; Guangdong basic and applied basic research foundation [2019A1515110488]; Durbrain Medical Laboratory, Hangzhou, China	Deutsche Forschungsgemeinschaft (German Research Foundation)(German Research Foundation (DFG)); National Natural Foundation of China(National Natural Science Foundation of China (NSFC)); Medical scientific research foundation of Guangdong province; Guangdong basic and applied basic research foundation; Durbrain Medical Laboratory, Hangzhou, China	77	1	1	5	5	ELSEVIER SCIENCE INC	NEW YORK	FREE RADICAL BIO MED	2022-02-01	2022	179		288	300		10.1016/j.freeradbiomed.2021.11.010		13	Biochemistry & Molecular Biology; Endocrinology & Metabolism	Science Citation Index Expanded (SCI-EXPANDED)	Biochemistry & Molecular Biology; Endocrinology & Metabolism	YW8BB	34767921		2022-05-29	WOS:000753637100004
J	Ma, LP; Yang, HY; Guan, L; Liu, XY; Zhang, T		Risks of antibiotic resistance genes and antimicrobial resistance under chlorination disinfection with public health concerns	ENVIRONMENT INTERNATIONAL	English	Article	Chlorination disinfection; Escherichia coli; Antibiotic resistance genes; Antibiotic susceptibility; Bacterial host; Metagenomic binning	As a widely used disinfection technology, the effects of chlorination on antibiotic resistome and bacterial community received great scientific concerns, while the pathogens associated health risks kept largely unknown. With this concern, the present study used metagenomic analysis combined with culture method to reveal chlorination effects on antibiotic resistance genes (ARGs) and their bacteria…	National Science Foundation of China [41907356]; Program for Professor of Special Appointment (Eastern Scholar) [TP2019020]; Shanghai Pujiang Talent Program [19PJ1402600]; Fundamental Research Funds for the Central Universities	National Science Foundation of China(National Natural Science Foundation of China (NSFC)); Program for Professor of Special Appointment (Eastern Scholar); Shanghai Pujiang Talent Program; Fundamental Research Funds for the Central Universities(Fundamental Research Funds for the Central Universities)	42	2	2	101	102	PERGAMON-ELSEVIER SCIENCE LTD	OXFORD	ENVIRON INT	JAN	2022	158				106978	10.1016/j.envint.2021.106978		10	Environmental Sciences	Science Citation Index Expanded (SCI-EXPANDED)	Environmental Sciences & Ecology	WZ0HH	34784521	gold	2022-05-29	WOS:000719655100002
J	Si, XM; Jia, H; Liu, N; Li, J; Pan, LN; Wang, JQ; Wu, ZL		Alpha-Ketoglutarate Attenuates Colitis in Mice by Increasing Lactobacillus Abundance and Regulating Stem Cell Proliferation via Wnt-Hippo Signaling	MOLECULAR NUTRITION & FOOD RESEARCH	English	Article	alpha-ketoglutarate; DSS-induced colitis; intestinal stem cell; Lactobacillus; Wnt/beta-catenin-Hippo signaling	Scope: Inflammatory bowel disease is an inflammatory gastrointestinal disorder associated with intestinal barrier damage, cell proliferation disorder, and dysbiosis of the intestinal microbiota. It remains unknown whether alpha-ketoglutarate (alpha-KG) can alleviate colitis in mice. Methods and results: Six-week-old male C57BL/6 mice supplemented with or without 0.5% alpha-KG (delivered in the fo…	National Natural Science Foundation of China [31625025, 32000082]	National Natural Science Foundation of China(National Natural Science Foundation of China (NSFC))	61	0	0	7	7	WILEY	HOBOKEN	MOL NUTR FOOD RES	MAY	2022	66	10			2100955	10.1002/mnfr.202100955		12	Food Science & Technology	Science Citation Index Expanded (SCI-EXPANDED)	Food Science & Technology	1I4CV	35220672		2022-05-29	WOS:000770832100001
J	Kim, JH; Baek, HS; Ha, EK; Cha, HR; Lee, SW; Han, MY		Association of Consuming Tap Water or Purified Water during Infancy with Irritable Bowel Syndrome in Children	CHILDREN-BASEL	English	Article	tap water; purified water; gut microbiota; irritable bowel syndrome	Objective: The objective of this study was to analyze the effect of consuming formula powder prepared with tap water or purified water during the first 4 to 6 months of life on the subsequent development of irritable bowel syndrome (IBS). Study design and setting: A total of 917,707 children who were born in Korea between 2007 and 2008 were analyzed. All children were followed up until they lost …	National Research Foundation of Korea (NRF); Korean government (MSIT) [NRF2020R1F1A1076452]	National Research Foundation of Korea (NRF)(National Research Foundation of Korea); Korean government (MSIT)(Korean Government)	21	0	0	0	0	MDPI	BASEL	CHILDREN-BASEL	FEB	2022	9	2			135	10.3390/children9020135		10	Pediatrics	Science Citation Index Expanded (SCI-EXPANDED)	Pediatrics	ZL8KH	35204856	gold, Green Published	2022-05-29	WOS:000763919800001
J	Anthonj, C; Setty, KE; Ferrero, G; Yaya, AMA; Poague, KIHM; Marsh, AJ; Augustijn, EW		Do health risk perceptions motivate water-and health-related behaviour? A systematic literature review	SCIENCE OF THE TOTAL ENVIRONMENT	English	Review	Behaviour change; Health-related knowledge; Hygiene; Sanitation; Water safety; WASH governance	Health-related risk perceptions are important determinants of health behaviours and components of behaviour change theories. What someone thinks or feels will motivate or hinder their intention or hesitancy to implement a certain be-haviour. Thus, a perceived potential risk to our health and well-being can influence our health-promoting and/or health-seeking behaviour. We aimed to review and synt…			218	0	0	8	8	ELSEVIER	AMSTERDAM	SCI TOTAL ENVIRON	2022-05-01	2022	819				152902	10.1016/j.scitotenv.2021.152902		25	Environmental Sciences	Science Citation Index Expanded (SCI-EXPANDED); Social Science Citation Index (SSCI)	Environmental Sciences & Ecology	ZQ0KO	34998758	Green Published, hybrid	2022-05-29	WOS:000766803100005
J	Taviani, E; Pedro, O		Impact of the aquatic pathobiome in low-income and middle-income countries (LMICs) quest for safe water and sanitation practices	CURRENT OPINION IN BIOTECHNOLOGY	English	Review		Microbial contamination of surface waters is of particular relevance in low-income and middle-income countries (LMICs) since they often represent the only available source of water for drinking and domestic use. In the recent years, a growing urbanization, profound demographic shifts and drastic climate events have greatly affected LMICs capacity to reach access to safe drinking water and sanitat…	Italian Agency for Cooperation Development [AID11096]; Dutch Ministry of Foreign Affairs through the DGIS IHE Delft Programmatic Cooperation	Italian Agency for Cooperation Development; Dutch Ministry of Foreign Affairs through the DGIS IHE Delft Programmatic Cooperation	38	0	0	0	0	CURRENT BIOLOGY LTD	LONDON	CURR OPIN BIOTECH	FEB	2022	73		220	224		10.1016/j.copbio.2021.08.015		5	Biochemical Research Methods; Biotechnology & Applied Microbiology	Science Citation Index Expanded (SCI-EXPANDED)	Biochemistry & Molecular Biology; Biotechnology & Applied Microbiology	ZG6AK	34492621		2022-05-29	WOS:000760339100029
J	Yan, ZH; Liu, YF; Zhang, T; Zhang, FM; Ren, HQ; Zhang, Y		Analysis of Microplastics in Human Feces Reveals a Correlation between Fecal Microplastics and Inflammatory Bowel Disease Status	ENVIRONMENTAL SCIENCE & TECHNOLOGY	English	Article	microplastics; inflammatory bowel disease; feces; health risk; source of exposure	Human ingestion of microplastics (MPs) is inevitable due to the ubiquity of MPs in various foods and drinking water. Whether the ingestion of MPs poses a substantial risk to human health is far from understood. Here, by analyzing the characteristics of MPs in the feces of patients with inflammatory bowel disease (IBD) and healthy people, for the first time, we found that the fecal MP concentratio…	National Natural Science Foundation of China [42077384, 21777068]	National Natural Science Foundation of China(National Natural Science Foundation of China (NSFC))	54	4	4	113	113	AMER CHEMICAL SOC	WASHINGTON	ENVIRON SCI TECHNOL	2022-01-04	2022	56	1	414	421		10.1021/acs.est.1c03924		8	Engineering, Environmental; Environmental Sciences	Science Citation Index Expanded (SCI-EXPANDED)	Engineering; Environmental Sciences & Ecology	ZL2HC	34935363		2022-05-29	WOS:000736494800001
J	Wu, D; Jin, L; Xie, JW; Liu, H; Zhao, J; Ye, D; Li, XD		Inhalable antibiotic resistomes emitted from hospitals: metagenomic insights into bacterial hosts, clinical relevance, and environmental risks	MICROBIOME	English	Article	Antibiotic resistome; Hospital PM2.5; ARG-hosting bacteria; Healthcare-associated infection; AMR risk	Background: Threats of antimicrobial resistance (AMR) to human health are on the rise worldwide. Airborne fine particulate matter (PM2.5), especially those emitted from hospitals, could serve as a substantial yet lesser-known environmental medium of inhalable antibiotic resistomes. A genome-centric understanding of the hosting bacterial taxa, mobility potential, and consequent risks of the resist…	National Natural Science Foundation of China [92043302, 42007393, 42107457]; Research Grants Council of Hong Kong [15210618, 15203920, 25210420, T21-705/20-N]; University Facility on Chemical and Environmental Analysis (UCEA) at The Hong Kong Polytechnic University; Society of Hong Kong Scholars; China Postdoctoral Science Foundation [XJ2018030]; National Key Research and Development Program of C…	National Natural Science Foundation of China(National Natural Science Foundation of China (NSFC)); Research Grants Council of Hong Kong(Hong Kong Research Grants Council); University Facility on Chemical and Environmental Analysis (UCEA) at The Hong Kong Polytechnic University; Society of Hong Kong Scholars; China Postdoctoral Science Foundation(China Postdoctoral Science Foundation); National Ke…	70	1	1	34	34	BMC	LONDON	MICROBIOME	2022-01-27	2022	10	1			19	10.1186/s40168-021-01197-5		16	Microbiology	Science Citation Index Expanded (SCI-EXPANDED)	Microbiology	YP6BZ	35086564	Green Published, gold	2022-05-29	WOS:000748708100001
J	Melara, EG; Avellaneda, MC; Valdivie, M; Garcia-Hernandez, Y; Aroche, R; Martinez, Y		Probiotics: Symbiotic Relationship with the Animal Host	ANIMALS	English	Article	animal host; animal production; beneficial microorganism; gut health	Simple Summary Intestinal health directly influences the profitability of animal production, and so growth-promoting antibiotics have been used in the feed or drinking water to reduce the impact of enteric diseases and improve production parameters. However, these have generated long-term bacterial resistance. In the search for natural alternatives to antibiotics, various probiotic strains have b…			195	0	0	7	7	MDPI	BASEL	ANIMALS-BASEL	MAR	2022	12	6			719	10.3390/ani12060719		26	Agriculture, Dairy & Animal Science; Veterinary Sciences; Zoology	Science Citation Index Expanded (SCI-EXPANDED)	Agriculture; Veterinary Sciences; Zoology	0C9JD	35327116	Green Published, gold	2022-05-29	WOS:000775620300001
J	Jankowski, J; Tykalowski, B; Stepniowska, A; Konieczka, P; Koncicki, A; Matusevicius, P; Ognik, K		Immune Parameters in Chickens Treated with Antibiotics and Probiotics during Early Life	ANIMALS	English	Article	chicken; antibiotic; probiotic; immune response	Simple Summary The effect of using antibiotics in animal production is resulting in an increase in drug resistance among bacteria, often to multiple substances with different mechanisms of action. In the future, this could lead to an increase in mortality in human and animal populations. In consequence, there is enormous and fully justified public pressure to limit the amount of antibiotics used …	Minister of Education and Science under the programme Regional Initiative of Excellence [010/RID/2018/19]	Minister of Education and Science under the programme Regional Initiative of Excellence	48	0	0	0	0	MDPI	BASEL	ANIMALS-BASEL	MAY	2022	12	9			1133	10.3390/ani12091133		11	Agriculture, Dairy & Animal Science; Veterinary Sciences; Zoology	Science Citation Index Expanded (SCI-EXPANDED)	Agriculture; Veterinary Sciences; Zoology	1F7EB	35565558		2022-05-29	WOS:000795326500001
J	Zhao, G; Williams, J; Washington, MK; Yang, YH; Long, JR; Townsend, SD; Yan, F		2 '-Fucosyllactose Ameliorates Chemotherapy-Induced Intestinal Mucositis by Protecting Intestinal Epithelial Cells Against Apoptosis	CELLULAR AND MOLECULAR GASTROENTEROLOGY AND HEPATOLOGY	English	Article	5-Fluorouracil; Human Milk Oligosaccharides; Intes-tinal Inflammation; Proliferation	BACKGROUND & AIMS: Intestinal mucositis, a severe complication of antineoplastic therapeutics, is characterized by mucosal injury and inflammation in the small intestine. Therapies for the prevention and treatment of this disease are needed. We investigated whether 2'-fucosyllactose (2'-FL), an abundant oligosaccharide in human milk, protects intestinal integrity and ameliorates intestinal mucosi…	National Institutes of Health [R01DK081134, R35GM133602, P30DK058404]; Crohn's and Colitis Foundation; College of Arts and Science at Vanderbilt University; Camille Dreyfus Teacher Scholar award; Alfred P. Sloan Foundation	National Institutes of Health(United States Department of Health & Human ServicesNational Institutes of Health (NIH) - USA); Crohn's and Colitis Foundation; College of Arts and Science at Vanderbilt University; Camille Dreyfus Teacher Scholar award; Alfred P. Sloan Foundation(Alfred P. Sloan Foundation)	49	1	1	3	3	ELSEVIER INC	SAN DIEGO	CELL MOL GASTROENTER		2022	13	2	441	457		10.1016/j.jcmgh.2021.09.015		17	Gastroenterology & Hepatology	Science Citation Index Expanded (SCI-EXPANDED)	Gastroenterology & Hepatology	YL5QC	34607083	Green Published, gold	2022-05-29	WOS:000745944600006
J	Dionysius, LG; Brooks, PR; Kurtboke, DI		Detection and control of off-flavour compound-producing streptomycetes on locally produced nuts using streptophages	MICROBIOLOGY AUSTRALIA	English	Article	actinomycetes; bacteriophages; food taints; geosmin; nuts; Streptomyces; streptophage; volatile organic compounds	Members of the phylum Actinomycetota are the most prominent part of the soil microbiota, more specifically the species within the genus Streptomyces of this phylum. Key functions of Streptomyces species (or streptomycetes in general terms) include nutrient cycling and plant growth promotion and disease protection. However, these species can also produce volatile organic compounds, predominantly g…			40	0	0	0	0	CSIRO PUBLISHING	CLAYTON	MICROBIOL AUST		2022	43	1	36	39		10.1071/MA22011		4	Microbiology	Emerging Sources Citation Index (ESCI)	Microbiology	1C2AT		gold	2022-05-29	WOS:000785754000001
J	Yu, QL; Feng, TS; Yang, JW; Su, WH; Zhou, R; Wang, YJ; Zhang, H; Li, H		Seasonal distribution of antibiotic resistance genes in the Yellow River water and tap water, and their potential transmission from water to human	ENVIRONMENTAL POLLUTION	English	Article	Antibiotic resistance genes; Potential pathogens; Water quality; Mobile genetic elements; Humans; Transmission	The prevalence and transmission of antibiotic resistance genes (ARGs) and opportunistic pathogens in water environments can pose great threat to public health. However, the dissemination of ARGs and opportunistic pathogens from water environments to humans has been poorly explored. Here, we employed 16S rRNA gene sequencing and high-throughput quantitative PCR techniques to explore the seasonal d…			81	4	4	54	64	ELSEVIER SCI LTD	OXFORD	ENVIRON POLLUT	2022-01-01	2022	292				118304	10.1016/j.envpol.2021.118304		13	Environmental Sciences	Science Citation Index Expanded (SCI-EXPANDED)	Environmental Sciences & Ecology	WN5JQ	34627965	Bronze	2022-05-29	WOS:000711804100002
J	Iniguez, AB; Tian, QY; Du, M; Zhu, MJ		Alpha-Ketoglutarate Promotes Goblet Cell Differentiation and Alters Urea Cycle Metabolites in DSS-Induced Colitis Mice	NUTRIENTS	English	Article	alpha-ketoglutarate; colitis; goblet cells; metabolome; mucin	The metabolite, alpha-ketoglutarate (aKG), shows promise as an approach for ameliorating colitis, but much remains unknown about the full extent of its effects on the metabolome and mucosal barrier. To further elucidate this matter, C57BL/6 male mice received drinking water with or without 1% aKG for three weeks, then were subjected to 2.5% dextran sulfate sodium (DSS) induction for 7 days follow…	National Institutes of USDA-National Institute of Food and Agriculture (USDA-NIFA) [2018-67017-27517]; Emerging Research Issues Competitive Grant from Agricultural Research Center at Washington State University	National Institutes of USDA-National Institute of Food and Agriculture (USDA-NIFA); Emerging Research Issues Competitive Grant from Agricultural Research Center at Washington State University	68	0	0	3	3	MDPI	BASEL	NUTRIENTS	MAR	2022	14	6			1148	10.3390/nu14061148		11	Nutrition & Dietetics	Science Citation Index Expanded (SCI-EXPANDED)	Nutrition & Dietetics	0B0VY	35334805	Green Published, gold	2022-05-29	WOS:000774362700001
J	Nopparatmaitree, M; Nava, M; Chumsangchotisakun, V; Saenphoom, P; Chotnipat, S; Kitpipit, W		Effect of trimmed asparagus by-products supplementation in broiler diets on performance, nutrients digestibility, gut ecology, and functional meat production	VETERINARY WORLD	English	Article	asparagus by-products; broiler; functional feed; functional meat; prebiotic	Background and Aim: Trimmed asparagus by-products (TABP) is the resultant waste from asparagus possessing. TABP has fructans, such as inulins and fructooligosaccharide, which can be utilized as an alternative prebiotic. This study was conducted to examine the effect of TABP dietary supplementation on the productive performance, nutrient digestibility, gut microbiota, volatile fatty acid (VFA) con…	NRC of Thailand; Silpakorn University Research, Innovation, and Creativity Administration Office [SURDI 58/01/45]	NRC of Thailand; Silpakorn University Research, Innovation, and Creativity Administration Office	102	0	0	0	0	VETERINARY WORLD	GUJARAT	VET WORLD	JAN	2022	15	1	147	161		10.14202/vetworld.2022.147-161		15	Agriculture, Dairy & Animal Science; Veterinary Sciences	Emerging Sources Citation Index (ESCI)	Agriculture; Veterinary Sciences	ZO1HR	35369594	gold, Green Published	2022-05-29	WOS:000765478600001
J	Singla, S; Sahu, C; Jena, G		Association of Type 1 diabetes with ulcerative colitis in BALB/c mice: Investigations on sex-specific differences	JOURNAL OF BIOCHEMICAL AND MOLECULAR TOXICOLOGY	English	Article	apoptosis; diabetes mellitus; inflammation; sex differences; ulcerative colitis	Diabetes comorbidity in ulcerative colitis (UC) has relevant clinical and therapeutic implications. The link between hyperglycemia and intestinal barrier function with respect to infection and inflammation consequences exists in diabetes. The present study was designed to decipher the molecular mechanisms associated with Type 1 Diabetes mellitus and the UC in both male and female BALB/c mice. Dex…	Science and Engineering Research Board [CRG/2020/000412]; National Institute of Pharmaceutical Education and Research, S.A.S. Nagar	Science and Engineering Research Board; National Institute of Pharmaceutical Education and Research, S.A.S. Nagar	47	0	0	2	2	WILEY	HOBOKEN	J BIOCHEM MOL TOXIC	APR	2022	36	4			e22980	10.1002/jbt.22980		14	Biochemistry & Molecular Biology; Toxicology	Science Citation Index Expanded (SCI-EXPANDED)	Biochemistry & Molecular Biology; Toxicology	0N1NE	34964214		2022-05-29	WOS:000735418200001
J	Li, SY; Jin, YS; Fu, WY; Cox, AD; Lee, D; Reddivari, L		Intermittent antibiotic treatment accelerated the development of colitis in IL-10 knockout mice	BIOMEDICINE & PHARMACOTHERAPY	English	Article	Intermittent antibiotic treatment; IL-10(-/-) mice; Colitis	Background and aims: Many epidemiological studies suggest an association between antibiotic exposure and the development of inflammatory bowel disease [IBD]. However, the majority of these studies are observational and still the question remains, Does the specific antibiotic administration regimen play a role in the development of colitis? This study aimed to compare the possible effects of conti…	USDA National Institute of Food and Agriculture Foundation [2016-67017-29285, 2019-67017-29258]	USDA National Institute of Food and Agriculture Foundation	60	0	0	5	5	ELSEVIER FRANCE-EDITIONS SCIENTIFIQUES MEDICALES ELSEVIER	ISSY-LES-MOULINEAUX	BIOMED PHARMACOTHER	FEB	2022	146				112486	10.1016/j.biopha.2021.112486		10	Medicine, Research & Experimental; Pharmacology & Pharmacy	Science Citation Index Expanded (SCI-EXPANDED)	Research & Experimental Medicine; Pharmacology & Pharmacy	XS7MC	34891113	gold	2022-05-29	WOS:000733087100008
J	Ding, YY; Liu, B; Zhang, Y; Fang, F; Li, XY; Wang, S; Wen, JY		Hydrogen sulphide protects mice against the mutual aggravation of cerebral ischaemia/reperfusion injury and colitis	EUROPEAN JOURNAL OF PHARMACOLOGY	English	Article	H2S; Cerebral I/R; Astrocytes; Brain-gut axis; RhoA/ROCK pathway; Colitis	This study was undertaken to determine whether ischaemia/reperfusion (I/R)-induced brain injury and dextran sulfate sodium (DSS)-induced colitis in mice are related. A cerebral I/R model of mice was established by blocking the bilateral common carotid arteries; 3% DSS in drinking water was administered to mice for 7 days to induce colitis; mice with cerebral I/R and colitis were administered DSS …	Natural Science Foundation of Colleges and Universities in Anhui Province [KJ2020A0144]	Natural Science Foundation of Colleges and Universities in Anhui Province	52	1	1	2	2	ELSEVIER	AMSTERDAM	EUR J PHARMACOL	2022-01-05	2022	914				174682	10.1016/j.ejphar.2021.174682		13	Pharmacology & Pharmacy	Science Citation Index Expanded (SCI-EXPANDED)	Pharmacology & Pharmacy	YY3KF	34871558		2022-05-29	WOS:000754689100002
J	Voglauer, EM; Zwirzitz, B; Thalguter, S; Selberherr, E; Wagner, M; Rychli, K		Biofilms in Water Hoses of a Meat Processing Environment Harbor Complex Microbial Communities	FRONTIERS IN MICROBIOLOGY	English	Article	biofilm matrix; contamination source; food spoilage; facultative pathogenic bacteria; intracellular bacteria	Safe and hygienic water distribution is essential for maintaining product quality and safety. It is known that biofilms alter the appearance and microbial quality of water along the distribution chain. Yet, biofilms in water hoses throughout the food processing environment have not been investigated in detail. Here, microbial communities from water hoses and other environmental sites in contact w…			50	0	0	5	5	FRONTIERS MEDIA SA	LAUSANNE	FRONT MICROBIOL	2022-02-14	2022	13				832213	10.3389/fmicb.2022.832213		13	Microbiology	Science Citation Index Expanded (SCI-EXPANDED)	Microbiology	ZJ0CJ	35237250	Green Published, gold	2022-05-29	WOS:000761979800001
J	Miguez-Suarez, G; Cardelle-Cobas, A; Sinisterra-Loaiza, L; Vazquez, B; Cepeda, A; Nebot, C		Development and Validation of Multi-Residue Method for Drugs Analysis in Human Feces by Liquid Chromatography-Tandem Mass Spectrometry	MOLECULES	English	Article	antibiotic; food of animal origin; water; feces; food; HPLC-MS; MS	The use of veterinary drugs in animal production is a common practice to secure animal and human health. However, residues of administrated drugs could be present in animal food products. Levels of drugs in food of animal origin are regulated within the European Union. In recent years, residues have been detected not only in food, but also in the environmental elements such as water or soil, mean…			40	0	0	2	2	MDPI	BASEL	MOLECULES	MAR	2022	27	5			1474	10.3390/molecules27051474		13	Biochemistry & Molecular Biology; Chemistry, Multidisciplinary	Science Citation Index Expanded (SCI-EXPANDED)	Biochemistry & Molecular Biology; Chemistry	ZT1NA	35268574	Green Published, gold	2022-05-29	WOS:000768921000001
J	Huang, CR; Du, W; Ni, YM; Lan, GL; Shi, GC		The effect of short-chain fatty acids on M2 macrophages polarization in vitro and in vivo	CLINICAL AND EXPERIMENTAL IMMUNOLOGY	English	Article	asthma; M2 polarization; acetate; butyrate; propionate	SCFAs inhibited M2 polarization in MH-S likely through GPR43 activation and HDAC inhibition. Butyrate and Propionate but not Acetate could inhibit M2 polarization and airway inflammation in asthma model. SCFAs also abrogated M2 polarization in human-derived macrophages. Alternatively activated macrophages (M2 polarization) play an important role in asthma. Short-chain fatty acids (SCFAs) possesse…	National Natural Science Foundation of China [81770025, 81970020]; Shanghai Municipal Health Commission [2019SY006]; Shanghai Key Laboratory of Emergency Prevention, Diagnosis and Treatment of Respiratory Infectious Diseases [20dz2261100]; Shanghai Municipal Key Clinical Specialty [shslczdzk02202]; Cultivation Project of Shanghai Major Infectious Disease Research Base [20dz2210500]; Cross researc…	National Natural Science Foundation of China(National Natural Science Foundation of China (NSFC)); Shanghai Municipal Health Commission; Shanghai Key Laboratory of Emergency Prevention, Diagnosis and Treatment of Respiratory Infectious Diseases; Shanghai Municipal Key Clinical Specialty; Cultivation Project of Shanghai Major Infectious Disease Research Base; Cross research funds of Translational …	65	0	0	9	9	OXFORD UNIV PRESS	OXFORD	CLIN EXP IMMUNOL	2022-01-28	2022	207	1	53	64		10.1093/cei/uxab028		12	Immunology	Science Citation Index Expanded (SCI-EXPANDED)	Immunology	0G0TB	35020860	Green Published	2022-05-29	WOS:000777766200006
J	Schwarzfischer, M; Rogler, G		The Intestinal Barrier-Shielding the Body from Nano- and Microparticles in Our Diet	METABOLITES	English	Article	epithelial cells; intestinal mucosa; nanoparticles; titanium dioxide; inflammasome; microplastic; nanoplastic	Nano- and microparticles are an implicit part of the human diet. They are unknowingly ingested with our food that contains them as additives or pollutants. However, their impact on human health is not yet understood and controversially discussed. The intestinal epithelial barrier shields our body against exogenous influences, such as commensal bacteria, pathogens, and body-foreign particles and, …	Swiss National Foundation (SNF) [324730_170109]	Swiss National Foundation (SNF)(Swiss National Science Foundation (SNSF))	210	0	0	9	9	MDPI	BASEL	METABOLITES	MAR	2022	12	3			223	10.3390/metabo12030223		21	Biochemistry & Molecular Biology	Science Citation Index Expanded (SCI-EXPANDED)	Biochemistry & Molecular Biology	0A6UT	35323666	Green Published, gold	2022-05-29	WOS:000774087700001
J	Jin, HB; Yan, MH; Pan, C; Liu, ZY; Sha, XX; Jiang, CY; Li, LX; Pan, MG; Li, DM; Han, XD; Ding, J		Chronic exposure to polystyrene microplastics induced male reproductive toxicity and decreased testosterone levels via the LH-mediated LHR/cAMP/PKA/StAR pathway	PARTICLE AND FIBRE TOXICOLOGY	English	Article	PS-MPs; Reproductive toxicity; Testosterone; LHR	Background: Microplastics (MPs), which are smaller in size and difficult to degrade, can be easily ingested by marine life and enter mammals through the food chain. Our previous study demonstrated that following acute exposure to MPs, the serum testosterone content reduced and sperm quality declined, resulting in male reproductive dysfunction in mice. However, the toxic effect of long-term exposu…	Natural Science Foundation of Jiangsu Province of China [BK20190316]; Fundamental Research Funds for the Central Universities [0214-14380438, 0214-14380471]; National Natural Science Foundation of China [31870492, 31901182, 31971517]	Natural Science Foundation of Jiangsu Province of China(Natural Science Foundation of Jiangsu Province); Fundamental Research Funds for the Central Universities(Fundamental Research Funds for the Central Universities); National Natural Science Foundation of China(National Natural Science Foundation of China (NSFC))	52	0	0	16	16	BMC	LONDON	PART FIBRE TOXICOL	2022-02-17	2022	19	1			13	10.1186/s12989-022-00453-2		17	Toxicology	Science Citation Index Expanded (SCI-EXPANDED)	Toxicology	ZC2QO	35177090	gold, Green Published	2022-05-29	WOS:000757371200001
J	Foh, B; Buhre, JS; Lunding, HB; Moreno-Fernandez, ME; Konig, P; Sina, C; Divanovic, S; Ehlers, M		Microbial metabolite butyrate promotes induction of IL-10(+)IgM(+) plasma cells	PLOS ONE	English	Article		The microbially-derived short-chain fatty acid butyrate is a central inhibitor of inflammatory innate and adaptive immune responses. Emerging evidence suggests that butyrate induces differentiation of IL-10-producing (IL-10(+)) regulatory B cells. However, the underlying mechanisms of butyrate-driven modulation of B cell differentiation are not fully defined. Given the dominant role of regulatory…	Deutsche Forschungsgemeinschaft (DFG, German Research Foundation) as part of the International Research Training Group - IRTG [1911]	Deutsche Forschungsgemeinschaft (DFG, German Research Foundation) as part of the International Research Training Group - IRTG(German Research Foundation (DFG))	81	0	0	0	0	PUBLIC LIBRARY SCIENCE	SAN FRANCISCO	PLOS ONE		2022	17	3			e0266071	10.1371/journal.pone.0266071		25	Multidisciplinary Sciences	Science Citation Index Expanded (SCI-EXPANDED)	Science & Technology - Other Topics	0P6KD	35333906	Green Published, gold	2022-05-29	WOS:000784335700043
J	Smati, S; Polizzi, A; Fougerat, A; Ellero-Simatos, S; Blum, Y; Lippi, Y; Regnier, M; Laroyenne, A; Huillet, M; Arif, M; Zhang, C; Lasserre, F; Marrot, A; Al Saati, T; Wan, JH; Sommer, C; Naylies, C; Batut, A; Lukowicz, C; Fougeray, T; Tramunt, B; Dubot, P; Smith, L; Bertrand-Michel, J; Hennuyer, N; Pradere, JP; Staels, B; Burcelin, R; Lenfant, F; Arnal, JF; Levade, T; Gamet-Payrastre, L; Lagarrig…		Integrative study of diet-induced mouse models of NAFLD identifies PPAR alpha as a sexually dimorphic drug target	GUT	English	Article	nonalcoholic steatohepatitis; liver metabolism; lipid metabolism; gene expression	Objective We evaluated the influence of sex on the pathophysiology of non-alcoholic fatty liver disease (NAFLD). We investigated diet-induced phenotypic responses to define sex-specific regulation between healthy liver and NAFLD to identify influential pathways in different preclinical murine models and their relevance in humans. Design Different models of diet-induced NAFLD (high-fat diet, choli…	INSERM; Agreenskills; SNFGE; Societe Francophone du Diabete; Societe Francaise d'Endocrinologie; Societe Francaise de Nutrition; JPI Fatmal; Region Occitanie; AFEF; ANR (Hepatomorphic)	INSERM(Institut National de la Sante et de la Recherche Medicale (Inserm)European Commission); Agreenskills; SNFGE; Societe Francophone du Diabete; Societe Francaise d'Endocrinologie; Societe Francaise de Nutrition; JPI Fatmal; Region Occitanie(Region Occitanie); AFEF; ANR (Hepatomorphic)(French National Research Agency (ANR))	55	4	4	4	12	BMJ PUBLISHING GROUP	LONDON	GUT	APR	2022	71	4	807	821		10.1136/gutjnl-2020-323323		15	Gastroenterology & Hepatology	Science Citation Index Expanded (SCI-EXPANDED)	Gastroenterology & Hepatology	ZT7TH	33903148	Green Submitted	2022-05-29	WOS:000728866100001
J	Fu, R; Niu, RY; Zhao, FY; Wang, JX; Cao, QQ; Yu, YH; Liu, C; Zhang, D; Sun, ZL		Exercise alleviated intestinal damage and microbial disturbances in mice exposed to fluoride	CHEMOSPHERE	English	Article	Fluoride; Exercise; Duodenum; Colon; Intestinal barrier	Gastrointestinal reaction is an important symptom of fluorosis and is associated with intestinal morphological and functional impairment. Regular moderate exercise may reduce the incidence of infection and contribute to the maintenance of intestinal mucosal function and immune homeostasis. In this study, the mice were randomly divided to four groups: control group (C, distilled water), exercise g…	National Natural Science Foundation of China [31802248]; Shanxi Scholarship Council of China [HGKY2019042]; Science and Technology Innovation Project of Uni-versities in Shanxi Province [2019L0361]; Graduate Innovation Project of Shanxi Province [2020SY202]	National Natural Science Foundation of China(National Natural Science Foundation of China (NSFC)); Shanxi Scholarship Council of China; Science and Technology Innovation Project of Uni-versities in Shanxi Province; Graduate Innovation Project of Shanxi Province	55	0	0	9	10	PERGAMON-ELSEVIER SCIENCE LTD	OXFORD	CHEMOSPHERE	FEB	2022	288				132658	10.1016/j.chemosphere.2021.132658		11	Environmental Sciences	Science Citation Index Expanded (SCI-EXPANDED)	Environmental Sciences & Ecology	XU3EV	34710452		2022-05-29	WOS:000734153600008
J	Wang, HB; Yu, PF; Schwarz, C; Zhang, B; Huo, LX; Shi, BY; Alvarez, PJJ		Phthalate Esters Released from Plastics Promote Biofilm Formation and Chlorine Resistance	ENVIRONMENTAL SCIENCE & TECHNOLOGY	English	Article	phthalate esters; oxidative stress; biofilm densification; disinfectant resistance	Phthalate esters (PAEs) are commonly released from plastic pipes in some water distribution systems. Here, we show that exposure to a low concentration (1-10 mu g/L) of three PAEs (dimethyl phthalate (DMP), di-n-hexyl phthalate (DnHP), and di-(2-ethylhexyl) phthalate (DEHP)) promotes Pseudomonas biofilm formation and resistance to free chlorine. At PAE concentrations ranging from 1 to 5 mu g/L, g…	NSF ERC on NanotechnologyEnabled Water Treatment [EEC-1449500]; National Natural Science Foundation of China [51878654, 52070189]; National Key Research and Development Program of China [2019YFD1100105]	NSF ERC on NanotechnologyEnabled Water Treatment; National Natural Science Foundation of China(National Natural Science Foundation of China (NSFC)); National Key Research and Development Program of China	62	0	0	77	77	AMER CHEMICAL SOC	WASHINGTON	ENVIRON SCI TECHNOL	2022-01-18	2022	56	2	1081	1090		10.1021/acs.est.1c04857		10	Engineering, Environmental; Environmental Sciences	Science Citation Index Expanded (SCI-EXPANDED)	Engineering; Environmental Sciences & Ecology	ZK8WB	34991317		2022-05-29	WOS:000742725600001
J	Kim, MJ; Hosseindoust, A; Lee, JH; Kim, KY; Kim, TG; Chae, BJ		Hot-melt extruded copper sulfate affects the growth performance, meat quality, and copper bioavailability of broiler chickens	ANIMAL BIOSCIENCE	English	Article	Bioavailability; Broiler Chickens; Copper Sulfate; Hot Melt Extrusion; Meat Quality; Nano-copper	Objective: This study was conducted to evaluate the effects of the supplementation of diets of broiler chickens with hot-melt extruded CuSO4 (HME-Cu) on their growth performance, nutrient digestibility, gut microbiota, small intestinal morphology, meat quality, and copper (Cu) bioavailability. Methods: A total of 225 broilers (Ross 308), one-day old and initial weight 39.14 g, were weighed and di…	Ministry of Agriculture, Food and Rural Affairs [116073-3]	Ministry of Agriculture, Food and Rural Affairs	52	0	0	2	2	ASIAN-AUSTRALASIAN ASSOC ANIMAL PRODUCTION SOC	SEOUL	ANIM BIOSCI	MAR	2022	35	3	484	493		10.5713/ab.21.0030		10	Agriculture, Dairy & Animal Science	Science Citation Index Expanded (SCI-EXPANDED)	Agriculture	ZN7CB	34293847	gold, Green Published	2022-05-29	WOS:000765186400013
J	Mugani, R; Aba, RP; Hejjaj, A; El Khalloufi, F; Ouazzani, N; Almeida, CMR; Carvalho, PN; Vasconcelos, V; Campos, A; Mandi, L; Oudra, B		Multi-Soil-Layering Technology: A New Approach to Remove Microcystis aeruginosa and Microcystins from Water	WATER	English	Article	toxic cyanobacteria; harmful algal blooms; eutrophic water; cyanotoxins; multi-soil-layering system; eco-technologies	Eutrophication of surface waters caused by toxic cyanobacteria such as Microcystis aeruginosa leads to the release of secondary metabolites called Microcystins (MCs), which are heptapeptides with adverse effects on soil microbiota, plants, animals, and human health. Therefore, to avoid succumbing to the negative effects of these cyanotoxins, various remediation approaches have been considered. Th…	European Union's Horizon 2020 research and innovation programme under the Marie Sklodowska-Curie grant [823860]; Fundacao para a Ciencia e Tecnologia (FCT) [UIDB/04423/2020, UIDP/04423/2020]; European Regional Development Fund (ERDF)	European Union's Horizon 2020 research and innovation programme under the Marie Sklodowska-Curie grant(SKA South Africa); Fundacao para a Ciencia e Tecnologia (FCT)(Portuguese Foundation for Science and TechnologyEuropean Commission); European Regional Development Fund (ERDF)(European Commission)	180	0	0	10	10	MDPI	BASEL	WATER-SUI	MAR	2022	14	5			686	10.3390/w14050686		21	Environmental Sciences; Water Resources	Science Citation Index Expanded (SCI-EXPANDED)	Environmental Sciences & Ecology; Water Resources	ZW8CD		gold	2022-05-29	WOS:000771433700001
J	Ning, X; Liang, JS; Men, YJ; Wang, YH; Chang, YY; Bai, YH; Liu, HJ; Wang, AJ; Zhang, T; Qu, JH		Siderophores provoke extracellular superoxide production by Arthrobacter strains during carbon sources-level fluctuation	ENVIRONMENTAL MICROBIOLOGY	English	Article		Superoxide and other reactive oxygen species (ROS) shape microbial communities and drive the transformation of metals and inorganic/organic matter. Taxonomically diverse bacteria and phytoplankton produce extracellular superoxide during laboratory cultivation. Understanding the physiological reasons for extracellular superoxide production by aerobes in the environment is a crucial question yet no…	National Natural Science Foundation of China [31700106, 52170156, 51778603, 51820105011]; Shenzhen Science and Technology Program [KQTD20190929172630447]; Hong Kong Scholars Program	National Natural Science Foundation of China(National Natural Science Foundation of China (NSFC)); Shenzhen Science and Technology Program; Hong Kong Scholars Program	36	0	0	21	21	WILEY	HOBOKEN	ENVIRON MICROBIOL	FEB	2022	24	2	894	904		10.1111/1462-2920.15914		11	Microbiology	Science Citation Index Expanded (SCI-EXPANDED)	Microbiology	ZH4ND	35072982	Green Published	2022-05-29	WOS:000748276100001
J	Wang, ZW; Peng, H; Zhang, R; Jiang, XH; Chen, S; Guo, P; Xiao, YM; Zeng, XW; Wang, Q; Aschner, M; Chou, WC; Li, DC; Chen, W; Chen, LP		<p>Assessment of intestinal injury of hexavalent chromium using a modified in vitro gastrointestinal digestion model</p>	TOXICOLOGY AND APPLIED PHARMACOLOGY	English	Article	Hexavalent chromium; Oral exposure; Intestinal injury; In vitro gastrointestinal digestion model	Intestinal injury assessment of hexavalent chromium (Cr-VI) in humans is crucial for quantifying assessment of adverse health risk posed by the intake of Cr (VI)-contaminated water. To overcome the deficiency in simulating human gastric reduction and intestinal absorption, we modified the constituents of simulated gastric fluid in in vitro digestion method by adding reductants glutathione (18 mu …	National Key Research and Devel-opment Program of China [2017YFC1600200]; National Natural Science Foundation of China [82073580]; Natural Science Foundation of Guangdong Provincial of China [2021A1515010350]; National Institute of Environmental Health Sciences (NIEHS) of USA [R01 ES10563, R01 ES07331, R01ES020852]	National Key Research and Devel-opment Program of China; National Natural Science Foundation of China(National Natural Science Foundation of China (NSFC)); Natural Science Foundation of Guangdong Provincial of China; National Institute of Environmental Health Sciences (NIEHS) of USA	42	0	0	5	5	ACADEMIC PRESS INC ELSEVIER SCIENCE	SAN DIEGO	TOXICOL APPL PHARM	2022-02-01	2022	436				115880	10.1016/j.taap.2022.115880		8	Pharmacology & Pharmacy; Toxicology	Science Citation Index Expanded (SCI-EXPANDED)	Pharmacology & Pharmacy; Toxicology	0Z7SM	35016909		2022-05-29	WOS:000791273500001
J	Sevillano, M; Vosloo, S; Cotto, I; Dai, ZH; Jiang, T; Santana, JMS; Padilla, IY; Rosario-Pabon, Z; Vega, CV; Cordero, JF; Alshawabkeh, A; Gu, A; Pinto, AJ		Spatial-temporal targeted and non-targeted surveys to assess microbiological composition of drinking water in Puerto Rico following Hurricane Maria	WATER RESEARCH X	English	Article	Drinking water quality; Hurricane Maria; Metagenomics; qPCR; Genome-resolved metagenomics	Loss of basic utilities, such as drinking water and electricity distribution, were sustained for months in the aftermath of Hurricane Maria's (HM) landfall in Puerto Rico (PR) in September 2017. The goal of this study was to assess if there was deterioration in biological quality of drinking water due to these disruptions. This study characterized the microbial composition of drinking water follo…	United States National Science Foundation (NSF) [CBET-1829754, CBET-1832756, IIS-1546428]; National Institute of Environmental Health Sciences (NIEHS) [P42ES017198, P50ES026049]; U.S. Environmental Protection Agency (EPA) [R83615501]	United States National Science Foundation (NSF)(National Science Foundation (NSF)); National Institute of Environmental Health Sciences (NIEHS)(United States Department of Health & Human ServicesNational Institutes of Health (NIH) - USANIH National Institute of Environmental Health Sciences (NIEHS)); U.S. Environmental Protection Agency (EPA)(United States Environmental Protection Agency)	79	0	0	8	11	ELSEVIER	AMSTERDAM	WATER RES X	2022-12-01	2021	13				100123	10.1016/j.wroa.2021.100123		13	Engineering, Environmental; Environmental Sciences; Water Resources	Science Citation Index Expanded (SCI-EXPANDED)	Engineering; Environmental Sciences & Ecology; Water Resources	WK1FK	34704006	gold, Green Submitted, Green Published	2022-05-29	WOS:000709478700003
J	Vosloo, S; Huo, LX; Anderson, CL; Dai, ZH; Sevillano, M; Pinto, A		Evaluating de Novo Assembly and Binning Strategies for Time Series Drinking Water Metagenomes	MICROBIOLOGY SPECTRUM	English	Article	drinking water; longitudinal (time series) dataset; genome-resolved metagenomics	Reconstructing microbial genomes from metagenomic short-read data can be challenging due to the unknown and uneven complexity of microbial communities. This complexity encompasses highly diverse populations, which often includes strain variants. Reconstructing high-quality genomes is a crucial part of the metagenomic workflow, as subsequent ecological and metabolic inferences depend on their accu…			71	2	2	7	7	AMER SOC MICROBIOLOGY	WASHINGTON	MICROBIOL SPECTR	DEC	2021	9	3			e01434-21	10.1128/Spectrum.01434-21		18	Microbiology	Science Citation Index Expanded (SCI-EXPANDED)	Microbiology	XX2HW	34730411	Green Published, Green Submitted	2022-05-29	WOS:000736124700143
J	Zhou, ZC; Xu, L; Zhu, L; Liu, Y; Shuai, XY; Lin, ZJ; Chen, H		Metagenomic analysis of microbiota and antibiotic resistome in household activated carbon drinking water purifiers	ENVIRONMENT INTERNATIONAL	English	Article	Antibiotic resistome; Microbial communities; Metagenomics; Point-of-use; Activated carbon	Existing drinking water treatment systems have limited ability to control emerging contaminants such as antibiotic resistance genes (ARGs). Household activated carbon water purifiers (HWPs) are convenient measures to assure drinking water quality. However, ARGs distribution in HWPs has not been reported. Here, ARGs, mobile genetic elements (MGEs) and bacteria communities were profiled in tap wate…	Natural Science Foundation of China [21677121, 21876147]; National Science and Technology Major Projects for Water Pollution Control and Treatment [2017ZX07201003]; Fundamental Research Funds for the Central Universities	Natural Science Foundation of China(National Natural Science Foundation of China (NSFC)); National Science and Technology Major Projects for Water Pollution Control and Treatment; Fundamental Research Funds for the Central Universities(Fundamental Research Funds for the Central Universities)	57	6	6	31	64	PERGAMON-ELSEVIER SCIENCE LTD	OXFORD	ENVIRON INT	MAR	2021	148				106394	10.1016/j.envint.2021.106394		9	Environmental Sciences	Science Citation Index Expanded (SCI-EXPANDED)	Environmental Sciences & Ecology	YI0XD	33486296	gold	2022-05-29	WOS:000743579500015
J	Zhou, K; Liu, WL; Chen, ZL; Yang, D; Qiu, ZG; Feng, H; Li, C; Jin, M; Li, JW; Xu, QY; Shen, ZQ		The effect of different drinking water in culture medium on feces microbiota diversity	JOURNAL OF WATER AND HEALTH	English	Article	16S rRNA; drinking water; gut microbiota	The human gut harbors trillions of microbes, which are extremely important to the health of the host. However, the effect of drinking water on gut microbiota has been poorly understood. In this study, we explored the response of BALB/c mice gut bacterial community (feces) to the different types of drinking water, including commercial bottled mineral water (MW), natural water (NW), purified water …			35	0	0	2	2	IWA PUBLISHING	LONDON	J WATER HEALTH	APR	2021	19	2	267	277		10.2166/wh.2020.075		11	Environmental Sciences; Public, Environmental & Occupational Health; Microbiology; Water Resources	Science Citation Index Expanded (SCI-EXPANDED)	Environmental Sciences & Ecology; Public, Environmental & Occupational Health; Microbiology; Water Resources	RU1ZJ	33901023	hybrid	2022-05-29	WOS:000644948600007
J	Goraj, W; Pytlak, A; Kowalska, B; Kowalski, D; Grzadziel, J; Szafranek-Nakonieczna, A; Galazka, A; Stepniewska, Z; Stepniewski, W		Influence of pipe material on biofilm microbial communities found in drinking water supply system	ENVIRONMENTAL RESEARCH	English	Article	DWDS; Biofilm microbiome; Potential pathogenic bacteria; NGS; Microbial ecology; Vampirovibrio	The biofilms and water samples from a model installation built of PVC-U, PE-HD and cast iron pipes were investigated using standard heterotrophic plate count and 16S rRNA Next Generation Sequencing. The results of the high throughput identification imply that the construction material strongly influences the microbiome composition. PVC-U and PE-HD pipes were dominated with Proteobacteria (54?60%)…	Department of Water Supply and Wastewater Disposal of Environmental Engineering Faculty of Lublin University of Technology	Department of Water Supply and Wastewater Disposal of Environmental Engineering Faculty of Lublin University of Technology	68	4	4	16	28	ACADEMIC PRESS INC ELSEVIER SCIENCE	SAN DIEGO	ENVIRON RES	MAY	2021	196				110433	10.1016/j.envres.2020.110433		8	Environmental Sciences; Public, Environmental & Occupational Health	Science Citation Index Expanded (SCI-EXPANDED)	Environmental Sciences & Ecology; Public, Environmental & Occupational Health	SA9KE	33166536		2022-05-29	WOS:000649620900004
J	Soler, P; Moreno-Mesonero, L; Zornoza, A; Macian, VJ; Moreno, Y		Characterization of eukaryotic microbiome and associated bacteria communities in a drinking water treatment plant	SCIENCE OF THE TOTAL ENVIRONMENT	English	Article	DWTP microbiome; EUkaryotes; Waterbome bacteria; UV disinfection; Amplicon-based sequencing	The effectiveness of drinking water treatment is critical to achieve an optimal and safe drinking water. Disinfection is one of the most important steps to eliminate the health concern caused by the microbial population in this type of water. However, no study has evaluated the changes in its microbiome, specially the eukaryotic microbiome, and the fates of opportunistic pathogens generated by UV…	Town Hall of Valencia	Town Hall of Valencia	75	2	2	12	17	ELSEVIER	AMSTERDAM	SCI TOTAL ENVIRON	2022-11-25	2021	797				149070	10.1016/j.scitotenv.2021.149070		14	Environmental Sciences	Science Citation Index Expanded (SCI-EXPANDED)	Environmental Sciences & Ecology	US9GI	34303230		2022-05-29	WOS:000697733100001
J	Potgieter, S; Dai, ZH; Havenga, M; Vosloo, S; Sigudu, M; Pinto, A; Venter, S		Reproducible Microbial Community Dynamics of Two Drinking Water Systems Treating Similar Source Waters	ACS ES&T WATER	English	Article	drinking water treatment; drinking water distribution; disinfection; microbial community dynamics; amplicon sequencing	Understanding whether the spatiotemporal dynamics of the drinking water microbiome are reproducible in full-scale drinking water systems is an important step in devising engineering strategies for effectively managing and manipulating it. However, direct comparisons across full-scale drinking water systems are challenging because multiple factors, from source water to treatment process choice and…	Rand Water, Gauteng, South Africa through the Rand Water Chair in Water Microbiology at the University of Pretoria; National Research Foundation (NRF); NSF [1749530]	Rand Water, Gauteng, South Africa through the Rand Water Chair in Water Microbiology at the University of Pretoria; National Research Foundation (NRF); NSF(National Science Foundation (NSF))	31	0	0	4	7	AMER CHEMICAL SOC	WASHINGTON	ACS EST WATER	2022-07-09	2021	1	7	1617	1627		10.1021/acsestwater.1c00093		11	Environmental Sciences; Water Resources	Emerging Sources Citation Index (ESCI)	Environmental Sciences & Ecology; Water Resources	TI4BJ		Green Submitted	2022-05-29	WOS:000672741600008
J	Bruno, A; Sandionigi, A; Magnani, D; Bernasconi, M; Pannuzzo, B; Consolandi, C; Camboni, T; Labra, M; Casiraghi, M		Different Effects of Mineral Versus Vegetal Granular Activated Carbon Filters on the Microbial Community Composition of a Drinking Water Treatment Plant	FRONTIERS IN ECOLOGY AND EVOLUTION	English	Article	drinking water; microbiome; HTS; Patescibacteria; granular activated carbon	Drinking water quality and safety is strictly regulated and constantly monitored, but little is known about the microorganisms inhabiting drinking water treatment plants (DWTPs). This lack of knowledge prevents optimization of designs and operational controls. Here we investigated the drinking water microbial community harbored by a groundwater-derived DWTP, involving mineral and vegetal granular…	Fondazione Cariplo [2015-0275]	Fondazione Cariplo(Fondazione Cariplo)	63	0	0	8	13	FRONTIERS MEDIA SA	LAUSANNE	FRONT ECOL EVOL	2022-03-25	2021	9				615513	10.3389/fevo.2021.615513		14	Ecology	Science Citation Index Expanded (SCI-EXPANDED)	Environmental Sciences & Ecology	RJ4ET		Green Published, gold	2022-05-29	WOS:000637554900001
J	Li, JR; Zhu, SL; Lv, ZP; Dai, HJ; Wang, Z; Wei, QW; Hamdard, E; Mustafa, S; Shi, FX; Fu, Y		Drinking Water with Saccharin Sodium Alters the Microbiota-Gut-Hypothalamus Axis in Guinea Pig	ANIMALS	English	Article	saccharin; hypothalamus; gut; microbiota; sweet receptor	Simple Summary Saccharin sodium (SS) is one of the commonly used artificial sweeteners (AS) in the food industry, but the mechanisms mediating the physiological effects of sweeteners in the gut-brain axis is still unclear. The aim of this study was to explore the regulatory effect of SS on the microbiota-gut-hypothalamus axis on guinea pigs. We found that SS treatment may alter the growth and glu…	China Postdoctoral Science Foundation [2019M651867]; Jiangsu Agriculture Science and Technology Innovation Fund (JASTIF) [CX (18)2002]	China Postdoctoral Science Foundation(China Postdoctoral Science Foundation); Jiangsu Agriculture Science and Technology Innovation Fund (JASTIF)	51	1	1	6	11	MDPI	BASEL	ANIMALS-BASEL	JUL	2021	11	7			1875	10.3390/ani11071875		20	Agriculture, Dairy & Animal Science; Veterinary Sciences; Zoology	Science Citation Index Expanded (SCI-EXPANDED)	Agriculture; Veterinary Sciences; Zoology	TN0VM	34201842	Green Published	2022-05-29	WOS:000675962500001
J	Cheng, X; Guo, XR; Huang, FH; Lei, H; Zhou, Q; Song, C		Effect of different sweeteners on the oral microbiota and immune system of Sprague Dawley rats	AMB EXPRESS	English	Article	Oral microbiota; Oral immune system; High-throughput sequencing; Sweetener; Microbiome	Sucrose, xylose, and saccharin are commonly used beverage additives and long-term consumption of these compounds inevitably affects the oral immune system and the composition of oral microbiomes. In this study, we used 24 Sprague Dawley rats divided into four groups, i.e., sucrose, saccharin, xylose, or pure water treated over an eight week period to evaluate any changes in the composition, commu…	Scientific Research Foundation for Talent Introduction at Southwest Medical University [0903-00040031]; Science Fund Project of the Southwest Medical University [0903-00031093]	Scientific Research Foundation for Talent Introduction at Southwest Medical University; Science Fund Project of the Southwest Medical University	22	1	1	2	5	SPRINGER	NEW YORK	AMB EXPRESS	2022-01-06	2021	11	1			8	10.1186/s13568-020-01171-8		9	Biotechnology & Applied Microbiology	Science Citation Index Expanded (SCI-EXPANDED)	Biotechnology & Applied Microbiology	PV6MY	33409714	gold, Green Published, Green Submitted	2022-05-29	WOS:000610101400004
J	Du, XY; Zhang, J; Zhang, X; Schramm, KW; Nan, BR; Huang, QY; Tian, MP; Shen, HQ		Persistence and reversibility of arsenic-induced gut microbiome and metabolome shifts in male rats after 30-days recovery duration	SCIENCE OF THE TOTAL ENVIRONMENT	English	Article	Arsenic; Gut microbiome; Metabolome; Reversibility	The metabolites of gut microbiome are important host-health regulating factors and can be interrupted when the host is exposed to environmental pollutant via ingestion route. Arsenic contaminated drinking water is one of the most serious environmental health problems worldwide. Therefore, the arsenic-induced alterations of gut microbiome and metabolome, especially the persistence and reversibilit…	National Natural Science Foundation of China [21677141, 21777157, 22076157]; Fundamental Research Funds for the Central Universities [20720190074]; Natural Science Foundation of Fujian Province [2018J01021, KLUEH201802]	National Natural Science Foundation of China(National Natural Science Foundation of China (NSFC)); Fundamental Research Funds for the Central Universities(Fundamental Research Funds for the Central Universities); Natural Science Foundation of Fujian Province(Natural Science Foundation of Fujian Province)	63	1	1	11	46	ELSEVIER	AMSTERDAM	SCI TOTAL ENVIRON	2022-07-01	2021	776				145972	10.1016/j.scitotenv.2021.145972		12	Environmental Sciences	Science Citation Index Expanded (SCI-EXPANDED)	Environmental Sciences & Ecology	RY0LX	33647652		2022-05-29	WOS:000647607600007
J	Nahok, K; Phetcharaburanin, J; Li, JV; Silsirivanit, A; Thanan, R; Boonnate, P; Joonhuathon, J; Sharma, A; Anutrakulchai, S; Selmi, C; Cha'on, U		Monosodium Glutamate Induces Changes in Hepatic and Renal Metabolic Profiles and Gut Microbiome of Wistar Rats	NUTRIENTS	English	Article	monosodium glutamate; gut microbiota; metabolic pathway; metabolomics; microbiome; trimethylamine	The short- and long-term consumption of monosodium glutamate (MSG) increases urinary pH but the effects on the metabolic pathways in the liver, kidney and the gut microbiota remain unknown. To address this issue, we investigated adult male Wistar rats allocated to receive drinking water with or without 1 g% MSG for 2 weeks (n = 10, each). We performed a Nuclear Magnetic Resonance (NMR) spectrosco…	The Royal Golden Jubilee Ph.D. Program (RGJ-Ph.D. Program) [PHD/0124/2558]; Khon Kaen University, Thailand [2559/4]; Faculty of Medicine, Khon Kaen University [I56205]; Chronic Kidney Disease Northeast Thailand (CKDNET) research group [CKDNET 2562]; MRC New Investigator Grant [MR/P002536/1]; ERC Starting Grant [715662]	The Royal Golden Jubilee Ph.D. Program (RGJ-Ph.D. Program); Khon Kaen University, Thailand; Faculty of Medicine, Khon Kaen University; Chronic Kidney Disease Northeast Thailand (CKDNET) research group; MRC New Investigator Grant(UK Research & Innovation (UKRI)Medical Research Council UK (MRC)); ERC Starting Grant(European Research Council (ERC))	46	0	0	5	8	MDPI	BASEL	NUTRIENTS	JUN	2021	13	6			1865	10.3390/nu13061865		15	Nutrition & Dietetics	Science Citation Index Expanded (SCI-EXPANDED)	Nutrition & Dietetics	SZ3IW	34070818	Green Published, gold	2022-05-29	WOS:000666464200001
C	Mintal, K; Vizvari, Z; Hormay, E; Kovacs, A; Bufa, A; Marosvolgyi, T; Lenard, L; Karadi, Z; Toth, A		Gastrointestinal microbiome depletion modifies behavioral processes without changing body composition	IEEE 15TH INTERNATIONAL SYMPOSIUM ON APPLIED COMPUTATIONAL INTELLIGENCE AND INFORMATICS (SACI 2021)	English	Proceedings Paper	Brain-gut-microbiota axis; gut microbiome; bioimpedance; short chain fatty acids	In recent times, our knowledge on the gastrointestinal microbiota has considerably improved. Dysfunctions of the gut microbiome have been shown to induce modifications of peripheral and central regulatory processes, ultimately leading to behavioral changes that cause functional deficits in brain functions. Therefore, the first aim of the present study was to generate massive dysbiosis of the gut …	European Union [EFOP-3.6.3-VEKOP-16-2017-00009]	European Union(European Commission)	14	0	0	0	0	IEEE	NEW YORK			2021			119	122		10.1109/SACI51354.2021.9465575		4	Computer Science, Artificial Intelligence; Computer Science, Information Systems; Computer Science, Theory & Methods	Conference Proceedings Citation Index - Science (CPCI-S)	Computer Science	BS1SC			2022-05-29	WOS:000695348300020
J	Li, SY; Wang, TM; Fu, WY; Kennett, M; Cox, AD; Lee, D; Vanamala, JKP; Reddivari, L		Role of Gut Microbiota in the Anti-Colitic Effects of Anthocyanin-Containing Potatoes	MOLECULAR NUTRITION & FOOD RESEARCH	English	Article	anthocyanin-containing potatoes; antibiotic; anti-colitic activity; colitis; gut microbiota	Scope Anthocyanin-containing potatoes exert anti-inflammatory activity in colitic mice. Gut bacterial dysbiosis plays a critical role in ulcerative colitis. This study examined the extent to which the anti-colitic activity of anthocyanin-containing red/purple-fleshed potatoes depends on the gut bacteria using a chemically-induced rodent model of colitis with the intact and antibiotic-ablated micr…	USDA National Institute of Food and Agriculture foundation [2016-67017-29285, 2019-67017-29258]	USDA National Institute of Food and Agriculture foundation	65	0	0	5	11	WILEY	HOBOKEN	MOL NUTR FOOD RES	DEC	2021	65	24			2100152	10.1002/mnfr.202100152		14	Food Science & Technology	Science Citation Index Expanded (SCI-EXPANDED)	Food Science & Technology	XO5NS	34633750		2022-05-29	WOS:000709904800001
J	Arshad, MA; Hassan, FU; Rehman, MS; Huws, SA; Cheng, YF; Din, AU		Gut microbiome colonization and development in neonatal ruminants: Strategies, prospects, and opportunities	ANIMAL NUTRITION	English	Review	Gut development; Microbial colonization; Rumen microbiota; Health; Performance	Colonization and development of the gut microbiome is a crucial consideration for optimizing the health and performance of livestock animals. This is mainly attributed to the fact that dietary and management practices greatly influence the gut microbiota, subsequently leading to changes in nutrient utilization and immune response. A favorable microbiome can be implanted through dietary or managem…	Southwest Medical University (SWMU) [42-00040149]	Southwest Medical University (SWMU)	207	2	2	17	25	KEAI PUBLISHING LTD	BEIJING	ANIM NUTR	SEP	2021	7	3	883	895		10.1016/j.aninu.2021.03.004		13	Agriculture, Dairy & Animal Science; Veterinary Sciences	Science Citation Index Expanded (SCI-EXPANDED)	Agriculture; Veterinary Sciences	UY7PU	34632119	Green Published, gold	2022-05-29	WOS:000701712000028
J	Song, TT; Guan, X; Wang, X; Qu, SS; Zhang, SW; Hui, WT; Men, LH; Chen, X		Dynamic modulation of gut microbiota improves post-myocardial infarct tissue repair in rats via butyric acid-mediated histone deacetylase inhibition	FASEB JOURNAL	English	Article	butyric acid; HDAC; microbiome; myocardial infarction	The complex and dynamic population of gut microbiota exerts a marked influence on the host during homeostasis and disease. Imbalance of gut microbiota metabolites may lead to cardiac dysfunction in patients with heart failure, which is related to myocardial infarction(MI) severity. However, the role of gut microbiota in the repair process after MI has rarely been reported. To explore the role of …	National Natural Science Foundation of China (NSFC) [81570253]; Health and Family Planning Commission of Jilin Province [2015Z040]; Department of Science and Technology of Jilin Province (Jilin Province Science and Technology Department) [20180101168JC]	National Natural Science Foundation of China (NSFC)(National Natural Science Foundation of China (NSFC)); Health and Family Planning Commission of Jilin Province; Department of Science and Technology of Jilin Province (Jilin Province Science and Technology Department)	44	4	4	12	22	WILEY	HOBOKEN	FASEB J	MAR	2021	35	3			e21385	10.1096/fj.201903129RRR		14	Biochemistry & Molecular Biology; Biology; Cell Biology	Science Citation Index Expanded (SCI-EXPANDED)	Biochemistry & Molecular Biology; Life Sciences & Biomedicine - Other Topics; Cell Biology	QX8EV	33565193	Bronze	2022-05-29	WOS:000629576700006
J	Gopalakrishnan, V; Dozier, EA; Glover, MS; Novick, S; Ford, M; Morehouse, C; Warrener, P; Caceres, C; Hess, S; Sellman, BR; Cohen, TS		Engraftment of Bacteria after Fecal Microbiota Transplantation Is Dependent on Both Frequency of Dosing and Duration of Preparative Antibiotic Regimen	MICROORGANISMS	English	Article	microbiome; conventional mice; antibiotics; engraftment	The gut microbiota has emerged as a key mediator of human physiology, and germ-free mice have been essential in demonstrating a role for the microbiome in disease. Preclinical models using conventional mice offer the advantage of working with a mature immune system. However, optimal protocols for fecal microbiota transplant (FMT) engraftment in conventional mice are yet to be established. Convent…	AstraZeneca	AstraZeneca(AstraZeneca)	54	1	1	2	2	MDPI	BASEL	MICROORGANISMS	JUL	2021	9	7			1399	10.3390/microorganisms9071399		16	Microbiology	Science Citation Index Expanded (SCI-EXPANDED)	Microbiology	TO1PQ	34209573	gold, Green Published	2022-05-29	WOS:000676693300001
J	Shang, LJ; Liu, HB; Yu, HT; Chen, MX; Yang, TR; Zeng, XF; Qiao, SY		Core Altered Microorganisms in Colitis Mouse Model: A Comprehensive Time-Point and Fecal Microbiota Transplantation Analysis	ANTIBIOTICS-BASEL	English	Article	colitis; microbiota; microbiota transplantation; Muribaculaceae; Turicibacter; Lachnospiraceae	Inflammatory bowel disease (IBD), including Crohn's disease (CD) and ulcerative colitis (UC), is characterized by chronic and relapsing inflammation within the gastrointestinal tract. Antibiotics have been used to treat IBD, primarily utilizing metronidazole. Although there does seem to be a treatment effect, the broad-spectrum antibiotics that have been used to date are crude tools and have many…	National Key Research and Development Program of China [32030105]; Chongqing Rongchang Agricultural and Animal Husbandry High-tech Industry Research and Development Project [cstc2019ngzx0019]	National Key Research and Development Program of China; Chongqing Rongchang Agricultural and Animal Husbandry High-tech Industry Research and Development Project	42	6	6	10	19	MDPI	BASEL	ANTIBIOTICS-BASEL	JUN	2021	10	6			643	10.3390/antibiotics10060643		11	Infectious Diseases; Pharmacology & Pharmacy	Science Citation Index Expanded (SCI-EXPANDED)	Infectious Diseases; Pharmacology & Pharmacy	SX8GN	34071229	Green Published, gold	2022-05-29	WOS:000665436300001
J	Zhang, TT; Zhu, X; Guo, JH; Gu, AZ; Li, D; Chen, JM		Toxicity Assessment of Nano-ZnO Exposure on the Human Intestinal Microbiome, Metabolic Functions, and Resistome Using an In Vitro Colon Simulator	ENVIRONMENTAL SCIENCE & TECHNOLOGY	English	Article	short-chain fatty acids; antibiotic resistance genes; Bacteroidetes; Kruskal-Wallis tests; gut microbiome	Nano-ZnO, as a commonly used nanomaterial, has been found in drinking water, food, and medicine; therefore, it poses potential health risks via the digestion system. However, little is known about the toxicity of nano-ZnO on the human intestinal microbiome, which plays critical roles in human health. This study comprehensively investigated the impact of nano-ZnO on the human gut microbiome, metab…	China National Natural Science Foundation [92043301, 91643106, 91843301]; Shanghai Science Foundation [20ZR1404300]; Australian Research Council [FT170100196, DP 170104330]	China National Natural Science Foundation(National Natural Science Foundation of China (NSFC)); Shanghai Science Foundation; Australian Research Council(Australian Research Council)	64	4	4	29	64	AMER CHEMICAL SOC	WASHINGTON	ENVIRON SCI TECHNOL	2022-05-18	2021	55	10	6884	6896		10.1021/acs.est.1c00573		13	Engineering, Environmental; Environmental Sciences	Science Citation Index Expanded (SCI-EXPANDED)	Engineering; Environmental Sciences & Ecology	SH7CQ	33969685		2022-05-29	WOS:000654292200036
J	Sinha, R; Zhao, N; Goedert, JJ; Byrd, DA; Wan, YH; Hua, X; Hullings, AG; Knight, R; van Breda, S; Mathijs, K; de Kok, TM; Ward, MH		Effects of processed meat and drinking water nitrate on oral and fecal microbial populations in a controlled feeding study	ENVIRONMENTAL RESEARCH	English	Article	Processed meat; Water nitrate; Nitrite; Oral and fecal microbiome; Phytochemicals	Background: One mechanism that can explain the link between processed meat consumption and colorectal cancer (CRC) is the production of carcinogenic N-nitroso compounds (NOCs) in the gastrointestinal tract. Oral and gut microbes metabolize ingested proteins (a source of secondary and tertiary amines and amides) and can reduce nitrate to nitrite, generating potentially carcinogenic NOCs. Objective…			49	2	2	1	9	ACADEMIC PRESS INC ELSEVIER SCIENCE	SAN DIEGO	ENVIRON RES	JUN	2021	197				111084	10.1016/j.envres.2021.111084		9	Environmental Sciences; Public, Environmental & Occupational Health	Science Citation Index Expanded (SCI-EXPANDED)	Environmental Sciences & Ecology; Public, Environmental & Occupational Health	SV3IZ	33785324	Green Accepted	2022-05-29	WOS:000663717500003
J	Yang, Y; Jiang, XL; Pandol, SJ; Han, YP; Zheng, XF		Green Plant Pigment, Chlorophyllin, Ameliorates Non-alcoholic Fatty Liver Diseases (NAFLDs) Through Modulating Gut Microbiome in Mice	FRONTIERS IN PHYSIOLOGY	English	Article	nonalcoholic fatty liver disease; sodium copper chlorophyllin; gut microbiota dysbiosis; endotoxin; intestinal barrier	Non-alcoholic fatty liver diseases (NAFLDs) along with metabolic syndrome and Type-2 diabetes (T2D) are increasingly prevalent worldwide. Without an effective resolution, simple hepatic steatosis may lead to non-alcoholic steatohepatitis (NASH), characterized by hepatocyte damage, chronic inflammation, necrosis, fatty degeneration, and cirrhosis. The gut microbiome is vital for metabolic homeosta…	Natural Science Foundation of China (NSFC) [31571165, 31771288, 82070846]; National Institutes of Health (USA) [P01CA163200, P50 AA011999, P01DK098108]	Natural Science Foundation of China (NSFC)(National Natural Science Foundation of China (NSFC)); National Institutes of Health (USA)(United States Department of Health & Human ServicesNational Institutes of Health (NIH) - USA)	52	0	0	12	13	FRONTIERS MEDIA SA	LAUSANNE	FRONT PHYSIOL	2022-10-26	2021	12				739174	10.3389/fphys.2021.739174		16	Physiology	Science Citation Index Expanded (SCI-EXPANDED)	Physiology	WW1FR	34764881	Green Published, gold	2022-05-29	WOS:000717671900001
J	Zhang, YJ; Zhang, YY; Liu, LN; Zhou, LL; Zhao, ZL		Impacts of antibiotics on biofilm bacterial community and disinfection performance on simulated drinking water supply pipe wall	ENVIRONMENTAL POLLUTION	English	Article	Biofilm; Drinking water supply system; Antibiotic resistance; Chlorine resistant bacteria; Metagenomics	Overuse of antibiotics is accelerating the spread of resistance risk in the environment. In drinking water supply systems, the effect of antibiotics on the resistance of biofilm is unclear, and there have been few studies in disinfectant-containing systems. Here, we designed a series of drinking water supply reactors to investigate the effects of antibiotics on biofilm and bacteria in the water. …	National Natural Science Foundation of China [51778453, 51878467]	National Natural Science Foundation of China(National Natural Science Foundation of China (NSFC))	50	2	2	32	55	ELSEVIER SCI LTD	OXFORD	ENVIRON POLLUT	2022-11-01	2021	288				117736	10.1016/j.envpol.2021.117736		11	Environmental Sciences	Science Citation Index Expanded (SCI-EXPANDED)	Environmental Sciences & Ecology	UR9II	34256291		2022-05-29	WOS:000697053100007
J	Huang, CK; Weerasekara, A; Bond, PL; Weynberg, KD; Guo, JH		Characterizing the premise plumbing microbiome in both water and biofilms of a 50-year-old building	SCIENCE OF THE TOTAL ENVIRONMENT	English	Article	Opportunistic waterborne pathogens; Premise plumbing microbiome; Drinking water distribution systems; Legionella; Mycobacterium; Heterogeneity	The premise plumbing portion of drinking water distribution systems (DWDS) has several characteristics that may favor microbial growth in the form of biofilms. These microbial communities are implicated as infectious sources for the spread of opportunistic waterborne pathogens by supporting their complex ecology and transmission through DWDS outlets to susceptible individuals. However, there is l…	Queensland Health Leveraging Grant funds; Australian Research Council [FT170100196]; CSIRO/UQ Future Science Platform Fellowship; National Health and Medical Research Council ( NHMRC) [APP1185399]; AustralianGovernment Research Training Program (RTP); QAEHS and Water Research Australia (WaterRA) [4533-17]	Queensland Health Leveraging Grant funds; Australian Research Council(Australian Research Council); CSIRO/UQ Future Science Platform Fellowship; National Health and Medical Research Council ( NHMRC)(National Health and Medical Research Council (NHMRC) of Australia); AustralianGovernment Research Training Program (RTP); QAEHS and Water Research Australia (WaterRA)	45	2	2	12	17	ELSEVIER	AMSTERDAM	SCI TOTAL ENVIRON	2022-12-01	2021	798				149225	10.1016/j.scitotenv.2021.149225		8	Environmental Sciences	Science Citation Index Expanded (SCI-EXPANDED)	Environmental Sciences & Ecology	UY8DO	34340073		2022-05-29	WOS:000701748100016
J	Yu, JS; Youn, GS; Choi, J; Kim, CH; Kim, BY; Yang, SJ; Lee, JH; Park, TS; Kim, BK; Kim, YB; Roh, SW; Min, BH; Park, HJ; Yoon, SJ; Lee, NY; Choi, YR; Kim, HS; Gupta, H; Sung, H; Han, SH; Suk, KT; Lee, DY		Lactobacillus lactis and Pediococcus pentosaceus-driven reprogramming of gut microbiome and metabolome ameliorates the progression of non-alcoholic fatty liver disease	CLINICAL AND TRANSLATIONAL MEDICINE	English	Article	gut-liver axis; indole; metabolites; microbiome; non-alcoholic fatty liver disease	Background Although microbioa-based therapies have shown putative effects on the treatment of non-alcoholic fatty liver disease (NAFLD), it is not clear how microbiota-derived metabolites contribute to the prevention of NAFLD. We explored the metabolomic signature of Lactobacillus lactis and Pediococcus pentosaceus in NAFLD mice and its association in NAFLD patients. Methods We used Western diet-…	National Research Foundation of Korea (NRF) - Ministry of Education, Science and Technology [NRF-2018M3A9F3020956, NRF-2019R1I1A3A01060447, NRF-2020R1A6A1A03043026, NRF-2021M3A9I4021433]; Korea Institute of Planning and Evaluation for Technology in Food, Agriculture and Forestry (IPET) through High Value-added Food Technology Development Program - Ministry of Agriculture, Food and Rural Affairs (…	National Research Foundation of Korea (NRF) - Ministry of Education, Science and Technology(Ministry of Education, Science and Technology, Republic of KoreaNational Research Foundation of Korea); Korea Institute of Planning and Evaluation for Technology in Food, Agriculture and Forestry (IPET) through High Value-added Food Technology Development Program - Ministry of Agriculture, Food and Rural A…	55	1	1	9	9	JOHN WILEY & SONS LTD	CHICHESTER	CLIN TRANSL MED	DEC	2021	11	12			e634	10.1002/ctm2.634		22	Oncology; Medicine, Research & Experimental	Science Citation Index Expanded (SCI-EXPANDED)	Oncology; Research & Experimental Medicine	ZF7PK	34965016	Green Published, gold	2022-05-29	WOS:000759761200036
J	Lee, DB; Calendo, G; Kopec, K; Henry, R; Coutts, S; McCarthy, D; Murphy, HM		The Impact of Pipe Material on the Diversity of Microbial Communities in Drinking Water Distribution Systems	FRONTIERS IN MICROBIOLOGY	English	Article	pipe material; annular reactor; drinking water; microbiome; biofilm	As many cities around the world face the prospect of replacing aging drinking water distribution systems (DWDS), water utilities must make careful decisions on new pipe material (e.g., cement-lined or PVC) for these systems. These decisions are informed by cost, physical integrity, and impact on microbiological and physicochemical water quality. Indeed, pipe material can impact the development of…	Institute for Genomics and Evolutionary Medicine (iGEM) at Temple Universit; Canada Research Chairs Program [950-232787]	Institute for Genomics and Evolutionary Medicine (iGEM) at Temple Universit; Canada Research Chairs Program(Canada Research Chairs)	89	0	0	22	22	FRONTIERS MEDIA SA	LAUSANNE	FRONT MICROBIOL	2022-12-21	2021	12				779016	10.3389/fmicb.2021.779016		14	Microbiology	Science Citation Index Expanded (SCI-EXPANDED)	Microbiology	YB5VE	34992587	gold, Green Published	2022-05-29	WOS:000739078900001
J	Whipple, B; Agar, J; Zhao, J; Pearce, DA; Kovacs, AD		The acidified drinking water-induced changes in the behavior and gut microbiota of wild-type mice depend on the acidification mode	SCIENTIFIC REPORTS	English	Article		Acidification of drinking water to a pH between 2.5 and 3.0 is widely used to prevent the spread of bacterial diseases in animal colonies. Besides hydrochloric acid (HCl), sulfuric acid (H2SO4) is also used to acidify drinking water. Here we examined the effects of H2SO4-acidified drinking water (pH=2.8) received from weaning (postnatal day 21) on the behavior and gut microflora of 129S6/SvEv mic…	Sanford Health	Sanford Health	74	3	3	0	3	NATURE RESEARCH	BERLIN	SCI REP-UK	2022-02-03	2021	11	1			2877	10.1038/s41598-021-82570-0		15	Multidisciplinary Sciences	Science Citation Index Expanded (SCI-EXPANDED)	Science & Technology - Other Topics	QF5XB	33536529	Green Published, gold	2022-05-29	WOS:000616966000005
J	Townsend, EM; Kelly, L; Muscatt, G; Box, JD; Hargraves, N; Lilley, D; Jameson, E		The Human Gut Phageome: Origins and Roles in the Human Gut Microbiome	FRONTIERS IN CELLULAR AND INFECTION MICROBIOLOGY	English	Review	gut microbiome; bacteriophages; phage; metagenomics; isolation; biofilm; disease; diet	The investigation of the microbial populations of the human body, known as the microbiome, has led to a revolutionary field of science, and understanding of its impacts on human development and health. The majority of microbiome research to date has focussed on bacteria and other kingdoms of life, such as fungi. Trailing behind these is the interrogation of the gut viruses, specifically the phage…	Warwick Integrative Synthetic Biology (WISB) - BBSRC/EPSRC under the UK Research Councils' Synthetic Biology for Growth programme [BB/M017982/1]; DTPs - BBSRC; EPSRC; NERC	Warwick Integrative Synthetic Biology (WISB) - BBSRC/EPSRC under the UK Research Councils' Synthetic Biology for Growth programme; DTPs - BBSRC; EPSRC(UK Research & Innovation (UKRI)Engineering & Physical Sciences Research Council (EPSRC)); NERC(UK Research & Innovation (UKRI)Natural Environment Research Council (NERC))	305	7	7	10	25	FRONTIERS MEDIA SA	LAUSANNE	FRONT CELL INFECT MI	2022-06-04	2021	11				643214	10.3389/fcimb.2021.643214		27	Immunology; Microbiology	Science Citation Index Expanded (SCI-EXPANDED)	Immunology; Microbiology	SU1TS	34150671	gold, Green Published	2022-05-29	WOS:000662924900001
J	Sun, NN; Hu, HL; Wang, F; Li, LL; Zhu, WW; Shen, Y; Xiu, JB; Xu, Q		Antibiotic-induced microbiome depletion in adult mice disrupts blood-brain barrier and facilitates brain infiltration of monocytes after bone-marrow transplantation	BRAIN BEHAVIOR AND IMMUNITY	English	Article	Microbiota; Bone marrow transplantation; Monocytes; Blood-brain barrier; Antibiotic; Nucleus accumbens; Septal nucleus; Hippocampus	The crosstalk between intestinal bacteria and the central nervous system, so called the gut-brain axis, is critically important for maintaining brain homeostasis and function. This study aimed to investigate the integrity of the blood-brain barrier (BBB) and migration of bone marrow (BM)-derived cells to the brain parenchyma after intestinal microbiota depletion in adult mice. Gut microbiota dysb…			53	11	12	6	7	ACADEMIC PRESS INC ELSEVIER SCIENCE	SAN DIEGO	BRAIN BEHAV IMMUN	FEB	2021	92		102	114		10.1016/j.bbi.2020.11.032		13	Immunology; Neurosciences; Psychiatry	Science Citation Index Expanded (SCI-EXPANDED)	Immunology; Neurosciences & Neurology; Psychiatry	UO7GT	33242652		2022-05-29	WOS:000694862200001
J	Bermudez-Martin, P; Becker, JAJ; Caramello, N; Fernandez, SP; Costa-Campos, R; Canaguier, J; Barbosa, S; Martinez-Gili, L; Myridakis, A; Dumas, ME; Bruneau, A; Cherbuy, C; Langella, P; Callebert, J; Launay, JM; Chabry, J; Barik, J; Le Merrer, J; Glaichenhaus, N; Davidovic, L		The microbial metabolite p-Cresol induces autistic-like behaviors in mice by remodeling the gut microbiota	MICROBIOME	English	Article	Microbiota; Autism; Behavior; Reward system; Metabolite; p-Cresol; 4-Cresol	Background: Autism spectrum disorders (ASD) are associated with dysregulation of the microbiota-gut-brain axis, changes in microbiota composition as well as in the fecal, serum, and urine levels of microbial metabolites. Yet a causal relationship between dysregulation of the microbiota-gut-brain axis and ASD remains to be demonstrated. Here, we hypothesized that the microbial metabolite p-Cresol,…	European Community 7th Framework Program under Coordinated Action NEURON-ERANET [291840]; MRC [MR/M501797/1]; ANR [ANR-19-CE14-0024-MicrobiAutism]; Region the Centre-Val de Loire (ARD2020 Biomedicaments GPCRAb); Labex MabImprove; Fondation de la Recherche Medicale (FRM) [ECO202006011591]	European Community 7th Framework Program under Coordinated Action NEURON-ERANET; MRC(UK Research & Innovation (UKRI)Medical Research Council UK (MRC)); ANR(French National Research Agency (ANR)); Region the Centre-Val de Loire (ARD2020 Biomedicaments GPCRAb); Labex MabImprove; Fondation de la Recherche Medicale (FRM)(Fondation pour la Recherche Medicale)	98	15	15	12	24	BMC	LONDON	MICROBIOME	2022-07-08	2021	9	1			157	10.1186/s40168-021-01103-z		23	Microbiology	Science Citation Index Expanded (SCI-EXPANDED)	Microbiology	TI0IG	34238386	Green Published, gold	2022-05-29	WOS:000672464200001
J	LaGamma, EF; Hu, FR; Cruz, FP; Bouchev, P; Nankova, BB		Bacteria - derived short chain fatty acids restore sympathoadrenal responsiveness to hypoglycemia after antibiotic-induced gut microbiota depletion	NEUROBIOLOGY OF STRESS	English	Article	Microbiome; Oral antibiotics; Acute hypoglycemia; Epinephrine; Fecal whole genome sequencing; Short chain fatty acids supplement	The microbiome co-evolved with their mammalian host over thousands of years. This commensal relationship serves a pivotal role in various metabolic, physiological, and immunological processes. Recently we discovered impaired adrenal catecholamine stress responses in germ-free mice suggesting developmental modification of the reflex arc or absence of an ongoing microbiome signal. To determine whet…	Boston Children's Health Physicians' Fellows Basic Research Grant Program	Boston Children's Health Physicians' Fellows Basic Research Grant Program	100	1	1	1	6	ELSEVIER SCIENCE INC	NEW YORK	NEUROBIOL STRESS	NOV	2021	15				100376	10.1016/j.ynstr.2021.100376		12	Neurosciences	Science Citation Index Expanded (SCI-EXPANDED)	Neurosciences & Neurology	WC6HQ	34401412	gold, Green Published	2022-05-29	WOS:000704357600006
J	Green, PG; Alvarez, P; Levine, JD		A role for gut microbiota in early-life stress-induced widespread muscle pain in the adult rat	MOLECULAR PAIN	English	Article	Neonatal limited bedding; myalgia; nociceptors; probiotics; antibiotics; microbiome	Adult rats that experienced neonatal limited bedding (NLB), a form of early-life stress, experience persistent muscle mechanical hyperalgesia. Since there is a growing recognition that the gut microbiome regulates pain and nociception, and that early-life stress produces a long-lasting impact on the gut microbiome, we tested the hypothesis that persistent muscle hyperalgesia seen in adult NLB rat…	NIH [AR063312]	NIH(United States Department of Health & Human ServicesNational Institutes of Health (NIH) - USA)	66	2	2	3	3	SAGE PUBLICATIONS INC	THOUSAND OAKS	MOL PAIN	JUN	2021	17				1.74481e+16	10.1177/17448069211022952		7	Neurosciences	Science Citation Index Expanded (SCI-EXPANDED)	Neurosciences & Neurology	ZA2RB	34096398	gold, Green Published	2022-05-29	WOS:000756015200001
J	Fu, YL; Peng, HX; Liu, JQ; Nguyen, TH; Hashmi, MZ; Shen, CF		Occurrence and quantification of culturable and viable but non-culturable (VBNC) pathogens in biofilm on different pipes from a metropolitan drinking water distribution system	SCIENCE OF THE TOTAL ENVIRONMENT	English	Article	Drinking water distribution system; Pipe material, pathogen; Culturability; Microbial community	Waterborne pathogens have been found in biofilms grown in drinking water distribution system (DWDS). However, there is a lack of quantitative study on the culturability of pathogens in biofilms from metropolitan DWDS. In this study, we quantified culturable and viable but non-culturable (VBNC) Escherichia colt, Salmonella enterica, Pseudomonas aeruginosa and Vibrio cholerae in biofilms collected …	National Natural Science Foundation of China [51678520]; National Key Research and Development Program of China [2016YFD0800200]; Zhejiang-Illinois Institute	National Natural Science Foundation of China(National Natural Science Foundation of China (NSFC)); National Key Research and Development Program of China; Zhejiang-Illinois Institute	107	14	14	36	93	ELSEVIER	AMSTERDAM	SCI TOTAL ENVIRON	2022-04-10	2021	764				142851	10.1016/j.scitotenv.2020.142851		14	Environmental Sciences	Science Citation Index Expanded (SCI-EXPANDED)	Environmental Sciences & Ecology	QB6KX	33097267		2022-05-29	WOS:000614249600048
J	Jalili, F; Trigui, H; Maldonado, JFG; Dorner, S; Zamyadi, A; Shapiro, BJ; Terrat, Y; Fortin, N; Sauve, S; Prevost, M		Can Cyanobacterial Diversity in the Source Predict the Diversity in Sludge and the Risk of Toxin Release in a Drinking Water Treatment Plant?	TOXINS	English	Article	cyanobacteria; microcystins (MCs); water treatment; sludge; shotgun metagenomics; cyanobacterial community; high-throughput sequencing	Conventional processes (coagulation, flocculation, sedimentation, and filtration) are widely used in drinking water treatment plants and are considered a good treatment strategy to eliminate cyanobacterial cells and cell-bound cyanotoxins. The diversity of cyanobacteria was investigated using taxonomic cell counts and shotgun metagenomics over two seasons in a drinking water treatment plant befor…	Genome Canada; Quebec (Algal Blooms, Treatment, Risk Assessment, Prediction and Prevention through Genomics (ATRAPP) projects)	Genome Canada(Genome Canada); Quebec (Algal Blooms, Treatment, Risk Assessment, Prediction and Prevention through Genomics (ATRAPP) projects)	72	3	3	5	15	MDPI	BASEL	TOXINS	JAN	2021	13	1			25	10.3390/toxins13010025		19	Food Science & Technology; Toxicology	Science Citation Index Expanded (SCI-EXPANDED)	Food Science & Technology; Toxicology	PW6BF	33401450	Green Published, gold	2022-05-29	WOS:000610753500001
J	Grossi, S; Rossi, L; Dell'Anno, M; Biffani, S; Rossi, CAS		Effects of Heated Drinking Water on the Growth Performance and Rumen Functionality of Fattening Charolaise Beef Cattle in Winter	ANIMALS	English	Article	rumen kinetics; rumen health; production efficiency; drinking water	Simple Summary Efficiency has been a major metric for measuring the production performances and profitability of zootechny, especially in beef cattle farming, even in terms of environmental sustainability. More efficient beef cattle farming should include a decrease in total feed consumption, equal or greater production performance and lower methane emissions and manure excretion. In fact, the ru…			36	0	0	5	12	MDPI	BASEL	ANIMALS-BASEL	AUG	2021	11	8			2218	10.3390/ani11082218		13	Agriculture, Dairy & Animal Science; Veterinary Sciences; Zoology	Science Citation Index Expanded (SCI-EXPANDED)	Agriculture; Veterinary Sciences; Zoology	UF7JZ	34438675	gold, Green Published	2022-05-29	WOS:000688748000001
J	Han, ZM; Lu, JY; An, W; Zhang, Y; Yang, M		Removal efficacy of opportunistic pathogen gene markers in drinking water supply systems: an in situ and large-scale molecular investigation	ENVIRONMENTAL SCIENCE AND POLLUTION RESEARCH	English	Article	Waterborne diseases; Water safety; Drinking water treatment; Biogeography; Tap water; Healthy risk	The prevalence and interactions with biofilm and disinfectant of opportunistic pathogens in drinking water supply systems (DWSSs) have been extensively interpreted. In contrast, the large geographical distribution and in situ removal of opportunistic pathogens are overlooked aspects. Here, paired source and tap water samples of 36 parallel DWSSs across China were collected, with five common water…	National Natural Science Foundation of China [81861138051, 31861143049]; Foundation of Major Science and Technology Program for Water Pollution Control and Treatment, China [2018ZX07502001]	National Natural Science Foundation of China(National Natural Science Foundation of China (NSFC)); Foundation of Major Science and Technology Program for Water Pollution Control and Treatment, China	38	0	0	13	20	SPRINGER HEIDELBERG	HEIDELBERG	ENVIRON SCI POLLUT R	OCT	2021	28	38	54153	54160		10.1007/s11356-021-15744-y		8	Environmental Sciences	Science Citation Index Expanded (SCI-EXPANDED)	Environmental Sciences & Ecology	UX0YH	34389952		2022-05-29	WOS:000684778100007
J	Peng, LY; Shi, HT; Gong, ZX; Yi, PF; Tang, B; Shen, HQ; Fu, BD		Protective effects of gut microbiota and gut microbiota-derived acetate on chicken colibacillosis induced by avian pathogenic Escherichia coli	VETERINARY MICROBIOLOGY	English	Article	Chickens colibacillosis; APEC; Gut microbiota; Acetate	Chicken colibacillosis is caused by avian pathogenic Escherichia coli (APEC), and results in huge economic losses to the poultry industry. With the investigation of the gut-lung axis, more studies have demonstrated the important role of gut microbiota in lung inflammation. The precise role of the gut microbiota in chickensassociated colibacillosis, however, is unknown. Thus, this study assessed t…	National Natural Science Foundation of China [31972724]; Special Fund for Agro-scientific Research in the Public Interest [201403051]	National Natural Science Foundation of China(National Natural Science Foundation of China (NSFC)); Special Fund for Agro-scientific Research in the Public Interest	44	3	3	9	17	ELSEVIER	AMSTERDAM	VET MICROBIOL	OCT	2021	261				109187	10.1016/j.vetmic.2021.109187		8	Microbiology; Veterinary Sciences	Science Citation Index Expanded (SCI-EXPANDED)	Microbiology; Veterinary Sciences	UO5NY	34399296		2022-05-29	WOS:000694743600002
J	Lakshmanan, AP; Al Za'abi, M; Ali, BH; Terranegra, A		The influence of the prebiotic gum acacia on the intestinal microbiome composition in rats with experimental chronic kidney disease	BIOMEDICINE & PHARMACOTHERAPY	English	Article	Chronic kidney disease; Gum acacia; Intestinal microbiome; Butyrate	Chronic kidney disease (CKD) is a globally common and important disease and there are evidence for a bidirectional relationship between microbiota and CKD. The aim of the study was to examine the influence of prebiotic - gum acacia (GA) on the intestinal microbiota in rats with adenine-induced CKD. Animals were randomly distributed into four equal groups (n = 6): control, adenine, GA and adenine …	Sidra Medicine, Doha, Qatar; Sultan Qaboos University, Muscat, Oman	Sidra Medicine, Doha, Qatar; Sultan Qaboos University, Muscat, Oman	91	11	11	2	3	ELSEVIER FRANCE-EDITIONS SCIENTIFIQUES MEDICALES ELSEVIER	ISSY-LES-MOULINEAUX	BIOMED PHARMACOTHER	JAN	2021	133				110992	10.1016/j.biopha.2020.110992		10	Medicine, Research & Experimental; Pharmacology & Pharmacy	Science Citation Index Expanded (SCI-EXPANDED)	Research & Experimental Medicine; Pharmacology & Pharmacy	PN6QU	33202283	gold	2022-05-29	WOS:000604602300006
J	Chen, GJ; Hu, PC; Xu, ZC; Peng, CY; Wang, YJ; Wan, XC; Cai, HM		The beneficial or detrimental fluoride to gut microbiota depends on its dosages	ECOTOXICOLOGY AND ENVIRONMENTAL SAFETY	English	Article	Fluoride; Gut microbiota; Dose-dependent manner	Fluoride, widely presented in drinking water and tea, may be detrimental or beneficial to the human health, depending on its dosages ingested. However, the relationship of different dosages of fluoride and gut microbiota is still unclear. In this work, the fermentation model using fecal samples provided by four volunteers was used to evaluate the effects of different dosages of fluoride (1, 2, 10…	National Natural Science Foundation of China [31770730]; Natural Science Foundation of Educational Commission of Anhui Province [KJ2016A216]; Modern Agroindustry Technology Research System in Tea Industry [CARS-19]	National Natural Science Foundation of China(National Natural Science Foundation of China (NSFC)); Natural Science Foundation of Educational Commission of Anhui Province; Modern Agroindustry Technology Research System in Tea Industry	41	1	1	7	17	ACADEMIC PRESS INC ELSEVIER SCIENCE	SAN DIEGO	ECOTOX ENVIRON SAFE	FEB	2021	209				111732	10.1016/j.ecoenv.2020.111732		8	Environmental Sciences; Toxicology	Science Citation Index Expanded (SCI-EXPANDED)	Environmental Sciences & Ecology; Toxicology	PY1PG	33373928	gold	2022-05-29	WOS:000611821300011
J	Yang, YF; Chi, L; Lai, YJ; Hsiao, YC; Ru, HY; Lu, K		The gut microbiome and arsenic-induced disease-iAs metabolism in mice	CURRENT ENVIRONMENTAL HEALTH REPORTS	English	Article	Arsenic metabolism; Arsenic toxicity; Gut microbiome; Arsenic-induced disease	Purpose of Review This review summarizes inorganic arsenic (iAs) metabolism and toxicity in mice and the gut microbiome and how iAs and the gut microbiome interact to induce diseases. Recent Findings Recently, a variety of studies have started to reveal the interactions between iAs and the gut microbiome. Evidence shows that gut bacteria can influence iAs biotransformation and disease risks. The …	NIH [R01ES024950, P30ES010126]; UNC-Superfund Research Program funding [P42ES-031007]; University of North Carolina Center for Environmental Health and Susceptibility	NIH(United States Department of Health & Human ServicesNational Institutes of Health (NIH) - USA); UNC-Superfund Research Program funding; University of North Carolina Center for Environmental Health and Susceptibility	85	1	1	11	29	SPRINGERNATURE	LONDON	CURR ENV HLTH REP	JUN	2021	8	2	89	97		10.1007/s40572-021-00305-9		9	Public, Environmental & Occupational Health	Science Citation Index Expanded (SCI-EXPANDED); Social Science Citation Index (SSCI)	Public, Environmental & Occupational Health	SV9FY	33852125	Green Accepted	2022-05-29	WOS:000640274500001
J	Chen, CM; Chou, HC; Yang, YCSH		Maternal Antibiotic Treatment Disrupts the Intestinal Microbiota and Intestinal Development in Neonatal Mice	FRONTIERS IN MICROBIOLOGY	English	Article	microbiota; intestine; tight junction; proliferating cell nuclear antigen; vascular endothelial growth factor	Maternal antibiotic treatment (MAT) during prenatal and intrapartum periods alters the bacterial composition and diversity of the intestinal microbiota of the offspring. The effect of MAT during pregnancy on the intestinal microbiota and its relationship with intestinal development remain unknown. This study investigated the effects of MAT during pregnancy on intestinal microbiota, injury and inf…	Ministry of Science and Technology in Taiwan [MOST 109-2314-B038-073]	Ministry of Science and Technology in Taiwan(Ministry of Science and Technology, Taiwan)	36	0	0	2	6	FRONTIERS MEDIA SA	LAUSANNE	FRONT MICROBIOL	2022-06-04	2021	12				684233	10.3389/fmicb.2021.684233		9	Microbiology	Science Citation Index Expanded (SCI-EXPANDED)	Microbiology	SU1ZY	34177871	Green Published, gold	2022-05-29	WOS:000662941900001
J	Chen, CM; Yang, YCSH; Chou, HC		Maternal antibiotic exposure disrupts microbiota and exacerbates hyperoxia-induced lung injury in neonatal mice	PEDIATRIC RESEARCH	English	Article		BACKGROUND: Perinatal antibiotic treatment alters intestinal microbiota and augments hyperoxia-induced lung injury in mice offspring. The effect of maternal antibiotic treatment (MAT) during pregnancy on the lung microbiota and its relationship with lung injury remains unknown. METHODS: We fed timed-pregnant C57BL/6N mice sterile drinking water containing antibiotics from gestational day 15 to de…	Ministry of Science and Technology in Taiwan [MOST 109-2314-B-038-073]; TMU Core Laboratory of Human Microbiome	Ministry of Science and Technology in Taiwan(Ministry of Science and Technology, Taiwan); TMU Core Laboratory of Human Microbiome	31	1	1	0	9	SPRINGERNATURE	LONDON	PEDIATR RES	OCT	2021	90	4	776	783		10.1038/s41390-020-01335-z		8	Pediatrics	Science Citation Index Expanded (SCI-EXPANDED)	Pediatrics	WR3AF	33469177		2022-05-29	WOS:000609126300005
J	Serrano, J; Smith, KR; Crouch, AL; Sharma, V; Yi, FC; Vargova, V; LaMoia, TE; Dupont, LM; Serna, V; Tang, FF; Gomes-Dias, L; Blakeslee, JJ; Hatzakis, E; Peterson, SN; Anderson, M; Pratley, RE; Kyriazis, GA		High-dose saccharin supplementation does not induce gut microbiota changes or glucose intolerance in healthy humans and mice	MICROBIOME	English	Article	Artificial sweeteners; Saccharin; Sweet taste receptors; Gut microbiota; Glucose intolerance; Short-chain fatty acids; Fecal metabolomics; Dysbiosis	Background: Non-caloric artificial sweeteners (NCAS) are widely used as a substitute for dietary sugars to control body weight or glycemia. Paradoxically, some interventional studies in humans and rodents have shown unfavorable changes in glucose homeostasis in response to NCAS consumption. The causative mechanisms are largely unknown, but adverse changes in gut microbiota have been proposed to m…	National Institutes of Health [R21DK110489]; National Institute of Food and Agriculture [NIFA-2018-6700128246]; Advent Health institutional funds	National Institutes of Health(United States Department of Health & Human ServicesNational Institutes of Health (NIH) - USA); National Institute of Food and Agriculture(United States Department of Agriculture (USDA)National Institute of Food and Agriculture); Advent Health institutional funds	107	8	8	10	55	BMC	LONDON	MICROBIOME	2022-01-12	2021	9	1			11	10.1186/s40168-020-00976-w		18	Microbiology	Science Citation Index Expanded (SCI-EXPANDED)	Microbiology	PR3TC	33431052	Green Published, gold	2022-05-29	WOS:000607160400001
J	Putri, RE; Kim, LH; Farhat, N; Felemban, M; Saikaly, PE; Vrouwenvelder, JS		Evaluation of DNA extraction yield from a chlorinated drinking water distribution system	PLOS ONE	English	Article		Desalination technology based on Reverse Osmosis (RO) membrane filtration has been resorted to provide high-quality drinking water. RO produced drinking water is characterized by a low bacterial cell concentration. Monitoring microbial quality and ensuring membrane-treated water safety has taken advantage of the rapid development of DNA-based techniques. However, the DNA extraction process from R…	King Abdullah University of Science and Technology (KAUST)	King Abdullah University of Science and Technology (KAUST)(King Abdullah University of Science & Technology)	95	0	0	4	11	PUBLIC LIBRARY SCIENCE	SAN FRANCISCO	PLOS ONE	2022-06-24	2021	16	6			e0253799	10.1371/journal.pone.0253799		20	Multidisciplinary Sciences	Science Citation Index Expanded (SCI-EXPANDED)	Science & Technology - Other Topics	TG9BX	34166448	Green Published, gold	2022-05-29	WOS:000671692800048
J	Gomez-Alvarez, V; Liu, H; Pressman, JG; Wahman, DG		Metagenomic Profile of Microbial Communities in a Drinking Water Storage Tank Sediment after Sequential Exposure to Monochloramine, Free Chlorine, and Monochloramine	ACS ES&T WATER	English	Article	storage tanks; metagenome; microbial community; metagenome-assembled genomes; drinking water; water quality	Sediment accumulation in drinking water storage facilities may lead to water quality degradation, including biological growth and disinfectant decay. The current research evaluated the microbiome present in a sediment after sequential exposure to monochloramine, free chlorine, and monochloramine. Chemical profiles within the sediment based on microelectrodes showed evidence of nitrification, and …	U.S. Environmental Protection Agency, through its Office of Research and Development	U.S. Environmental Protection Agency, through its Office of Research and Development(United States Environmental Protection Agency)	54	0	0	15	28	AMER CHEMICAL SOC	WASHINGTON	ACS EST WATER	2022-05-14	2021	1	5	1283	1294		10.1021/acsestwater.1c00016		12	Environmental Sciences; Water Resources	Emerging Sources Citation Index (ESCI)	Environmental Sciences & Ecology; Water Resources	SH4TP	34337601	Green Accepted	2022-05-29	WOS:000654129900021
J	Sun, SM; Araki, Y; Hanzawa, F; Umeki, M; Kojima, T; Nishimura, N; Ikeda, S; Mochizuki, S; Oda, H		High sucrose diet-induced dysbiosis of gut microbiota promotes fatty liver and hyperlipidemia in rats	JOURNAL OF NUTRITIONAL BIOCHEMISTRY	English	Article	Metabolic syndrome; nonalcoholic fatty liver diseases; gut microbiome; animal models; fatty acid synthesis; carbohydrate.	Excess sucrose intake has been found to be a major factor in the development of metabolic syndrome, especially in promoting nonalcoholic fatty liver disease. The excess fructose is believed to targets the liver to promote de novo lipogenesis, as described in major biochemistry textbooks. On the contrary, in this study, we explored the possible involvement of gut microbiota in excess sucrose-induc…	Japan Society for the Promotion of Science (JSPS) [21658052, 25292069, 16H04922]; Mishima Kaiun Memorial Foundation	Japan Society for the Promotion of Science (JSPS)(Ministry of Education, Culture, Sports, Science and Technology, Japan (MEXT)Japan Society for the Promotion of Science); Mishima Kaiun Memorial Foundation(Mishima Kaiun Memorial Foundation)	52	7	7	11	32	ELSEVIER SCIENCE INC	NEW YORK	J NUTR BIOCHEM	JUL	2021	93				108621	10.1016/j.jnutbio.2021.108621		8	Biochemistry & Molecular Biology; Nutrition & Dietetics	Science Citation Index Expanded (SCI-EXPANDED)	Biochemistry & Molecular Biology; Nutrition & Dietetics	SF4PA	33705945		2022-05-29	WOS:000652738600004
J	Webster, TM; McFarland, A; Gebert, MJ; Oliverio, AM; Nichols, LM; Dunn, RR; Hartmann, EM; Fierer, N		Structure and Functional Attributes of Bacterial Communities in Premise Plumbing Across the United States	ENVIRONMENTAL SCIENCE & TECHNOLOGY	English	Article	microbial ecology; premise plumbing; drinking water; metagenomics; water supply	Microbes that thrive in premise plumbing can have potentially important effects on human health. Yet, how and why plumbing-associated microbial communities vary across broad spatial scales remain undetermined. We characterized the bacterial communities in 496 showerheads collected from across the continental United States. The overall community structure, determined by 16S rRNA gene amplicon sequ…	Innovative Research Program of the Cooperative Institute for Research in Environmental Sciences; High Plains Intermountain Center for Agricultural Health Safety; U.S. Department of Defense; Northwestern University Biotechnology Training Program; Searle Leadership Fund; Cooperative Institute for Research in Environmental Sciences Postdoctoral Fellowship program	Innovative Research Program of the Cooperative Institute for Research in Environmental Sciences; High Plains Intermountain Center for Agricultural Health Safety; U.S. Department of Defense(United States Department of Defense); Northwestern University Biotechnology Training Program; Searle Leadership Fund; Cooperative Institute for Research in Environmental Sciences Postdoctoral Fellowship program	69	0	0	32	51	AMER CHEMICAL SOC	WASHINGTON	ENVIRON SCI TECHNOL	2022-10-19	2021	55	20	14105	14114		10.1021/acs.est.1c03309		10	Engineering, Environmental; Environmental Sciences	Science Citation Index Expanded (SCI-EXPANDED)	Engineering; Environmental Sciences & Ecology	WL5OE	34606240		2022-05-29	WOS:000710453500069
J	Liu, Q; Xi, YJ; Wang, QX; Liu, JH; Li, PR; Meng, X; Liu, K; Chen, WX; Liu, XB; Liu, ZG		Mannan oligosaccharide attenuates cognitive and behavioral disorders in the 5xFAD Alzheimer's disease mouse model via regulating the gut microbiota-brain axis	BRAIN BEHAVIOR AND IMMUNITY	English	Article	Alzheimer's disease; Mannan oligosaccharide; Cognition; Anxiety-like behaviors; Neuroinflammation; HPA axis; Gut-brain axis; SCFAs	Alzheimer's disease (AD) is a progressive neurodegenerative disease characterized by cognitive deficits and psychiatric symptoms. The gut microbiota-brain axis plays a pivotal role during AD development, which could target nutritional intervention. The prebiotic mannan oligosaccharide (MOS) has been reported to reshape the gut microbiome and enhanced the formation of the neuroprotective metabolit…	National Natural Science Foundation of China [81871118, 81803231]; China Postdoctoral Science Foundation [2018T111104, 2016M602867]; Innovative Talent Promotion Program-Technology Innovation Team [2019TD-006]; Tang Cornell-China Scholars Program from Cornell University in the U.S.; Alexander von Humboldt-Stiftung in Germany	National Natural Science Foundation of China(National Natural Science Foundation of China (NSFC)); China Postdoctoral Science Foundation(China Postdoctoral Science Foundation); Innovative Talent Promotion Program-Technology Innovation Team; Tang Cornell-China Scholars Program from Cornell University in the U.S.; Alexander von Humboldt-Stiftung in Germany(Alexander von Humboldt Foundation)	85	13	13	13	50	ACADEMIC PRESS INC ELSEVIER SCIENCE	SAN DIEGO	BRAIN BEHAV IMMUN	JUL	2021	95		330	343		10.1016/j.bbi.2021.04.005		14	Immunology; Neurosciences; Psychiatry	Science Citation Index Expanded (SCI-EXPANDED)	Immunology; Neurosciences & Neurology; Psychiatry	SN8CY	33839232		2022-05-29	WOS:000658515600001
J	Hebert, JC; Radford-Smith, DE; Probert, F; Ilott, N; Chan, KW; Anthony, DC; Burnet, PWJ		Mom's diet matters: Maternal prebiotic intake in mice reduces anxiety and alters brain gene expression and the fecal microbiome in offspring	BRAIN BEHAVIOR AND IMMUNITY	English	Article	Galacto-oligosaccharide; Short-chain fatty acids; Early life; NMDAR; Prefrontal cortex; Hippocampus; Perinatal; 16S sequencing; Gut-brain axis; NMR	Compelling evidence links enteric microbes to brain function and behavior. Galacto-oligosaccharide prebiotics have been shown to modulate the composition of gut flora and induce metabolic, neurochemical, and behavioral changes in adult rodents. Despite the brain being most susceptible to environmental factors, such as nutrients and toxins, during the earliest stages of development, it is unknown …	Rhodes Trust; Biotechnology, Biological Sciences, Research Council (BBSRC) UK [BB/I006311/1]; Internal Oxford University funds; Wellcome Trust [203141/Z/16/Z]; BBSRC [BB/I006311/1, BB/N010035/1] Funding Source: UKRI	Rhodes Trust; Biotechnology, Biological Sciences, Research Council (BBSRC) UK(UK Research & Innovation (UKRI)Biotechnology and Biological Sciences Research Council (BBSRC)); Internal Oxford University funds; Wellcome Trust(Wellcome TrustEuropean Commission); BBSRC(UK Research & Innovation (UKRI)Biotechnology and Biological Sciences Research Council (BBSRC))	76	4	5	5	29	ACADEMIC PRESS INC ELSEVIER SCIENCE	SAN DIEGO	BRAIN BEHAV IMMUN	JAN	2021	91		230	244		10.1016/j.bbi.2020.09.034		15	Immunology; Neurosciences; Psychiatry	Science Citation Index Expanded (SCI-EXPANDED)	Immunology; Neurosciences & Neurology; Psychiatry	PI9OG	33031920	Green Submitted	2022-05-29	WOS:000601410600004
J	Opeyemi, OM; Rogers, MB; Firek, BA; Janesko-Feldman, K; Vagni, V; Mullett, SJ; Wendell, SG; Nelson, BP; New, LA; Mario, E; Kochanek, PM; Bayir, H; Clark, RSB; Morowitz, MJ; Simon, DW		Sustained Dysbiosis and Decreased Fecal Short-Chain Fatty Acids after Traumatic Brain Injury and Impact on Neurologic Outcome	JOURNAL OF NEUROTRAUMA	English	Article	gut-brain axis; microbiome; short-chain fatty acids; traumatic brain injury	Traumatic brain injury (TBI) alters microbial populations present in the gut, which may impact healing and tissue recovery. However, the duration and impact of these changes on outcome from TBI are unknown. Short-chain fatty acids (SCFAs), produced by bacterial fermentation of dietary fiber, are important signaling molecules in the microbiota gut-brain axis. We hypothesized that TBI would lead to…	National Institutes of Neurological Disorders and Stroke [R21 NS115173]; NIH [NIHS10OD023402]; UPMC Children's Hospital of Pittsburgh	National Institutes of Neurological Disorders and Stroke(United States Department of Health & Human ServicesNational Institutes of Health (NIH) - USANIH National Institute of Neurological Disorders & Stroke (NINDS)); NIH(United States Department of Health & Human ServicesNational Institutes of Health (NIH) - USA); UPMC Children's Hospital of Pittsburgh	55	6	6	5	10	MARY ANN LIEBERT, INC	NEW ROCHELLE	J NEUROTRAUM	2022-09-15	2021	38	18	2610	2621		10.1089/neu.2020.7506		12	Critical Care Medicine; Clinical Neurology; Neurosciences	Science Citation Index Expanded (SCI-EXPANDED)	General & Internal Medicine; Neurosciences & Neurology	US2IV	33957773		2022-05-29	WOS:000658437400001
J	Schut, GJ; Thorgersen, MP; Poole, FL; Haja, DK; Putumbaka, S; Adams, MWW		Tungsten enzymes play a role in detoxifying food and antimicrobial aldehydes in the human gut microbiome	PROCEEDINGS OF THE NATIONAL ACADEMY OF SCIENCES OF THE UNITED STATES OF AMERICA	English	Article	tungsten; gut microbiome; anaerobes; Eubacterium; aldehydes	Tungsten (W) is a metal that is generally thought to be seldom used in biology. We show here that a W-containing oxidoreductase (WOR) family is diverse and widespread in the microbial world. Surprisingly, WORs, along with the tungstate-specific transporter Tup, are abundant in the human gut microbiome, which contains 24 phylogenetically distinct WOR types. Two model gut microbes containing six ty…	NIH [GM 136885]; Division of Chemical Sciences, Geosciences and Biosciences, Office of Basic Energy Sciences of the Department of Energy [DE-FG05-95ER20175]	NIH(United States Department of Health & Human ServicesNational Institutes of Health (NIH) - USA); Division of Chemical Sciences, Geosciences and Biosciences, Office of Basic Energy Sciences of the Department of Energy	64	1	1	5	8	NATL ACAD SCIENCES	WASHINGTON	P NATL ACAD SCI USA	2022-10-26	2021	118	43			e2109008118	10.1073/pnas.2109008118		10	Multidisciplinary Sciences	Science Citation Index Expanded (SCI-EXPANDED)	Science & Technology - Other Topics	WS3WM	34686601		2022-05-29	WOS:000715115300001
J	Pellissery, AJ; Vinayamohan, PG; Kuttappan, DA; Mishra, N; Fragomeni, BD; Maas, K; Mooyottu, S; Venkitanarayanan, K		Protective Effect of Baicalin against Clostridioides difficile Infection in Mice	ANTIBIOTICS-BASEL	English	Article	Clostridioides difficile; baicalin; microbiome; gut dysbiosis; mouse model	This study investigated the prophylactic and therapeutic efficacies of baicalin (BC), a plant-derived flavone glycoside, in reducing the severity of Clostridioides difficile infection (CDI) in a mouse model. In the prophylactic trial, C57BL/6 mice were provided with BC (0, 11, and 22 mg/L in drinking water) from 12 days before C. difficile challenge through the end of the experiment, whereas BC a…	University of Connecticut, Office of Vice President for Research, under the Research Excellence Program 2019-20	University of Connecticut, Office of Vice President for Research, under the Research Excellence Program 2019-20	60	1	1	3	5	MDPI	BASEL	ANTIBIOTICS-BASEL	AUG	2021	10	8			926	10.3390/antibiotics10080926		21	Infectious Diseases; Pharmacology & Pharmacy	Science Citation Index Expanded (SCI-EXPANDED)	Infectious Diseases; Pharmacology & Pharmacy	UF6OX	34438975	Green Published, gold	2022-05-29	WOS:000688692400001
J	Volf, J; Crhanova, M; Karasova, D; Faldynova, M; Kubasova, T; Seidlerova, Z; Sebkova, A; Zeman, M; Juricova, H; Matiasovicova, J; Foltyn, M; Tvrdon, Z; Rychlik, I		Eggshell and Feed Microbiota Do Not Represent Major Sources of Gut Anaerobes for Chickens in Commercial Production	MICROORGANISMS	English	Article	chicken; microbiota; caecum; eggshell; hatchery; feed	In this study, we addressed the origin of chicken gut microbiota in commercial production by a comparison of eggshell and feed microbiota with caecal microbiota of 7-day-old chickens, using microbiota analysis by 16S rRNA sequencing. In addition, we tested at which timepoint during prenatal or neonatal development it is possible to successfully administer probiotics. We found that eggshell microb…	Czech Ministry of Agriculture [RVO0518]; Czech Ministry of Regional Development [INPOMED ATCZ194]	Czech Ministry of Agriculture(Ministry of Agriculture, Czech Republic); Czech Ministry of Regional Development	30	1	1	3	4	MDPI	BASEL	MICROORGANISMS	JUL	2021	9	7			1480	10.3390/microorganisms9071480		11	Microbiology	Science Citation Index Expanded (SCI-EXPANDED)	Microbiology	TN5BV	34361916	Green Published, gold	2022-05-29	WOS:000676250700001
J	Zhao, X; Yang, Y; Feng, K; Wang, XH; Liu, BF; Xie, GJ; Xing, DF		Self-regulating microbiome networks ensure functional resilience of biofilms in sand biofilters during manganese load fluctuations	WATER RESEARCH	English	Article	Drinking water; Sand biofiltration; Biofilm microbiome; Manganese oxidation; Community network	Sand biofilters (SBFs) are commonly used to remove manganese (Mn(II)) from drinking water. Mn(II) load variation frequently occurs in SBFs due to fluctuating influent Mn(II) concentrations or flow rates. Therefore, it is important to understand the responses of microbial biofilms in SBFs to environmental disturbances and how they affect Mn(II) oxidation efficiency. Here, the responses of microbia…	National Natural Science Foundation of China [31870114]; State Key Laboratory of Urban Water Resource and Environment (Harbin Institute of Technology) [2019DX02]	National Natural Science Foundation of China(National Natural Science Foundation of China (NSFC)); State Key Laboratory of Urban Water Resource and Environment (Harbin Institute of Technology)(Harbin Institute of Technology)	61	5	5	32	86	PERGAMON-ELSEVIER SCIENCE LTD	OXFORD	WATER RES	2022-01-01	2021	188				116473	10.1016/j.watres.2020.116473		9	Engineering, Environmental; Environmental Sciences; Water Resources	Science Citation Index Expanded (SCI-EXPANDED)	Engineering; Environmental Sciences & Ecology; Water Resources	PG0FZ	33038718		2022-05-29	WOS:000599421400001
J	Li, X; Tan, XF; Chen, QS; Zhu, XL; Zhang, J; Zhang, J; Jia, BL		Prodigiosin of Serratia marcescens ZPG19 Alters the Gut Microbiota Composition of Kunming Mice	MOLECULES	English	Article	gut microbiota; Kunming mice; pathologic visceral changes; prodigiosin; Serratia marcescens	Prodigiosin is a red pigment produced by Serratia marcescens with anticancer, antimalarial, and antibacterial effects. In this study, we extracted and identified a red pigment from a culture of S. marcescens strain ZPG19 and investigated its effect on the growth performance and intestinal microbiota of Kunming mice. High-performance liquid chromatography/mass spectrometry revealed that the pigmen…	Foundation of Natural Science Foundation of Shandong Province [ZR2020KE038]; Shandong Province Agricultural Major Application Technology Innovation Project [20182130106]; Natural Science Foundation of China [51978347]	Foundation of Natural Science Foundation of Shandong Province(Natural Science Foundation of Shandong Province); Shandong Province Agricultural Major Application Technology Innovation Project; Natural Science Foundation of China(National Natural Science Foundation of China (NSFC))	60	1	1	2	5	MDPI	BASEL	MOLECULES	APR	2021	26	8			2156	10.3390/molecules26082156		13	Biochemistry & Molecular Biology; Chemistry, Multidisciplinary	Science Citation Index Expanded (SCI-EXPANDED)	Biochemistry & Molecular Biology; Chemistry	RT6WP	33918541	gold, Green Published	2022-05-29	WOS:000644599800001
J	Sehnal, L; Brammer-Robbins, E; Wormington, AM; Blaha, L; Bisesi, J; Larkin, I; Martyniuk, CJ; Simonin, M; Adamovsky, O		Microbiome Composition and Function in Aquatic Vertebrates: Small Organisms Making Big Impacts on Aquatic Animal Health	FRONTIERS IN MICROBIOLOGY	English	Review	microbiome; fish; aquatic mammals; stressors; biomonitoring; ecosystem health	Aquatic ecosystems are under increasing stress from global anthropogenic and natural changes, including climate change, eutrophication, ocean acidification, and pollution. In this critical review, we synthesize research on the microbiota of aquatic vertebrates and discuss the impact of emerging stressors on aquatic microbial communities using two case studies, that of toxic cyanobacteria and micr…	National Science Foundation Graduate Research Fellowship Program [2019285699]; National Science Foundation Grant (CBET Award) [1605119]; RECETOX research infrastructure (Ministry of Education, Youth and Sport of the Czech Republic) [LM2018121]; CETOCOEN EXCELLENCE Teaming 2 project - Horizon2020 [857560]; Ministry of Education, Youth and Sport of the Czech Republic [CZ.02.1.01/0.0/0.0/17_043/0009…	National Science Foundation Graduate Research Fellowship Program(National Science Foundation (NSF)); National Science Foundation Grant (CBET Award); RECETOX research infrastructure (Ministry of Education, Youth and Sport of the Czech Republic); CETOCOEN EXCELLENCE Teaming 2 project - Horizon2020; Ministry of Education, Youth and Sport of the Czech Republic(Ministry of Education, Youth & Sports - …	190	16	17	25	54	FRONTIERS MEDIA SA	LAUSANNE	FRONT MICROBIOL	2022-03-11	2021	12				567408	10.3389/fmicb.2021.567408		21	Microbiology	Science Citation Index Expanded (SCI-EXPANDED)	Microbiology	RC8EK	33776947	Green Published, gold	2022-05-29	WOS:000633027000001
J	Holc, D; Madrecka-Witkowska, B; Komorowska-Kaufman, M; Szelag-Wasielewska, E; Pruss, A; Cybulski, Z		The application of different methods for indirect microbial development assessment in pilot scale drinking water biofilters	ARCHIVES OF ENVIRONMENTAL PROTECTION	English	Article	biofilm; drinking water treatment; pilot scale; microbiological activity; biological activated carbon filters (BAC); identification of microorganisms	The biofiltration process in the biologically activated carbon filters (BAC) is one of advanced methods of water treatment. It enables efficient elimination of dissolved organic matter and some inorganic pollutants. The production of high-quality drinking water requires an appropriate method of filter work control based on biofilm growth assessment. The first aim of the study was to assess the mi…	National Science Centre, Poland [2019/03/X/NZ9/01051, 504101/0713/SBAD/0936, 504101/0713/SBAD/0933]	National Science Centre, Poland(National Science Centre, Poland)	45	0	0	3	5	POLSKA AKAD NAUK, POLISH ACAD SCIENCES, INST ENVIRON ENG PAS	WARSZAWA	ARCH ENVIRON PROT		2021	47	3	37	49		10.24425/aep.2021.138462		13	Environmental Sciences	Science Citation Index Expanded (SCI-EXPANDED)	Environmental Sciences & Ecology	UX6AE			2022-05-29	WOS:000700925000003
J	Payne, E; Harrington, K; Richard, P; Brackin, R; Davis, R; Couture, S; Liff, J; Asmus, F; Mutina, E; Fisher, A; Giuvelis, D; Sannajust, S; Rostama, B; King, T; Mattei, LM; Lee, JJ; Friedman, ES; Bittinger, K; May, M; Stevenson, GW		Effects of Vancomycin on Persistent Pain-Stimulated and Pain-Depressed Behaviors in Female Fischer Rats With or Without Voluntary Access to Running Wheels	JOURNAL OF PAIN	English	Article	Pain-depressed behaviors; wheel running; rats; gut microbiome; antibiotics; amino acids	The present experiments determined the effects of the narrow-spectrum antibiotic vancomycin on inflammatory pain-stimulated and pain-depressed behaviors in rats. Persistent inflammatory pain was modeled using dilute formalin (0.5%). Two weeks of oral vancomycin administered in drinking water attenuated Phase II formalin pain-stimulated behavior, and prevented formalin pain-depressed wheel running…	NIH COBRE grant [P20GM103643]	NIH COBRE grant	77	0	0	2	2	CHURCHILL LIVINGSTONE	EDINBURGH	J PAIN	NOV	2021	22	11	1530	1544		10.1016/j.jpain.2021.05.003		15	Clinical Neurology; Neurosciences	Science Citation Index Expanded (SCI-EXPANDED)	Neurosciences & Neurology	WX9CP	34029686		2022-05-29	WOS:000718886200017
J	Avila-Roman, J; Arreaza-Gil, V; Cortes-Espinar, AJ; Soliz-Rueda, JR; Mulero, M; Muguerza, B; Arola-Arnal, A; Arola, L; Torres-Fuentes, C		Impact of gut microbiota on plasma oxylipins profile under healthy and obesogenic conditions	CLINICAL NUTRITION	English	Article	Gut microbiota; Oxylipins; Lipid mediators; Obesity; Inflammation; Cafeteria diet	Background & aims: Oxylipins (OXLs) are bioactive lipid metabolites derived from polyunsaturated fatty acids (PUFAs) which act as signaling molecules and are involved in inflammatory processes such as those that occur in obesity. On the other hand, gut microbiota plays an essential role in regulating inflammatory responses. However, little is known about the potential impact of gut bacteria on OX…	Ministerio de Economia, Industria y Competitividad [AGL2016-77105-R]; European Union through the operative program ERDF of Catalonia (PECT-NUTRI-SALT, 2014-2020); Universitat Rovira i Virgili (URV); URV; Ministerio de Ciencia, Innovacion y Universidades (MICINN); European Social Fund (ESF); Secretaria d'Universitats i Recerca del Departament d'Empresa i Coneixement de la Generalitat de Catalunya	Ministerio de Economia, Industria y Competitividad(Spanish Government); European Union through the operative program ERDF of Catalonia (PECT-NUTRI-SALT, 2014-2020); Universitat Rovira i Virgili (URV); URV; Ministerio de Ciencia, Innovacion y Universidades (MICINN)(Spanish Government); European Social Fund (ESF)(European Social Fund (ESF)); Secretaria d'Universitats i Recerca del Departament d'Emp…	72	3	3	2	5	CHURCHILL LIVINGSTONE	EDINBURGH	CLIN NUTR	APR	2021	40	4	1475	1486		10.1016/j.clnu.2021.02.035		12	Nutrition & Dietetics	Science Citation Index Expanded (SCI-EXPANDED)	Nutrition & Dietetics	RN5PM	33743282	hybrid	2022-05-29	WOS:000640403100008
J	Yan, XY; Chen, XS; Tian, XL; Qiu, YL; Wang, J; Yu, G; Dong, NS; Feng, J; Xie, JX; Nalesnik, M; Niu, RY; Xiao, B; Song, GH; Quinones, S; Ren, XF		Co-exposure to inorganic arsenic and fluoride prominently disrupts gut microbiota equilibrium and induces adverse cardiovascular effects in offspring rats	SCIENCE OF THE TOTAL ENVIRONMENT	English	Article	Inorganic arsenic; Fluoride; Co-exposure; Gut microbiota perturbations; Cardiovascular effects	Co-exposure to inorganic arsenic (iAs) and fluoride (F-) and their collective actions on cardiovascular systems have been recognized as a global public health concern. Emerging studies suggest an association between the perturbation of gut bacterial microbiota and adverse cardiovascular effects (CVEs), both of which are the consequence of iAs and F- exposure in human and experimental animals. The…	National Natural Science Foundation of China [81773405]; Postdoctoral Science Foundation of China [2016M600199]; Program for the Outstanding Innovative Teams of Higher Learning Institute of Shanxi	National Natural Science Foundation of China(National Natural Science Foundation of China (NSFC)); Postdoctoral Science Foundation of China(China Postdoctoral Science Foundation); Program for the Outstanding Innovative Teams of Higher Learning Institute of Shanxi	118	1	1	6	25	ELSEVIER	AMSTERDAM	SCI TOTAL ENVIRON	2022-05-01	2021	767				144924	10.1016/j.scitotenv.2020.144924		13	Environmental Sciences	Science Citation Index Expanded (SCI-EXPANDED)	Environmental Sciences & Ecology	QG6GE	33636766		2022-05-29	WOS:000617681100077
J	Roggenbeck, BA; Chief, LKB; Walk, ST		Antibiotic perturbation of the murine gut microbiome introduces inter-individual susceptibility to arsenic	TOXICOLOGY	English	Article	Arsenic; Arsenite; Arsenate; Antibiotic; Gut microbiome	Arsenic is a Group 1 human carcinogen and at least 200 million people around the world are exposed to unsafe levels of arsenic, predominantly through contaminated drinking water. Arsenic has also been used for hundreds, if not thousands, of years as an intentional poison due to its odorless/tasteless properties and the general lack of technology required to identify it. Both acute and chronic ars…	National Institutes of General Medical Sciences (NIH) [P20GM103474]; National Cancer Institute (NIH) [R01CA215784]; National Institute of Food and Agriculture, U.S. Department of Agriculture, Hatch project [1009600]	National Institutes of General Medical Sciences (NIH)(United States Department of Health & Human ServicesNational Institutes of Health (NIH) - USANIH National Institute of General Medical Sciences (NIGMS)); National Cancer Institute (NIH)(United States Department of Health & Human ServicesNational Institutes of Health (NIH) - USANIH National Cancer Institute (NCI)); National Institute of Food and…	25	0	0	1	2	ELSEVIER IRELAND LTD	CLARE	TOXICOLOGY	2022-05-30	2021	456				152798	10.1016/j.tox.2021.152798		7	Pharmacology & Pharmacy; Toxicology	Science Citation Index Expanded (SCI-EXPANDED)	Pharmacology & Pharmacy; Toxicology	SW1OP	33901602	Green Accepted, hybrid	2022-05-29	WOS:000664289700018
J	Lian, NQ; Shen, MX; Zhang, K; Pan, JC; Jiang, Y; Yu, Y; Yu, YH		Drinking Hydrogen-Rich Water Alleviates Chemotherapy-Induced Neuropathic Pain Through the Regulation of Gut Microbiota	JOURNAL OF PAIN RESEARCH	English	Article	hydrogen-rich water; gut microbiota; CINP; LPS-TLR4 pathway	Introduction: Chemotherapy-induced neuropathic pain (CINP) is one of the most common complications of chemotherapeutic drugs which limits the dose and duration of potentially life-saving anticancer treatment and compromises the quality of life of patients. Our previous studies have reported that molecular hydrogen (H-2) can be used to prevent and treat various diseases. But the underlying mechani…	National Natural Science Foundation of China [82072150, 82001149]	National Natural Science Foundation of China(National Natural Science Foundation of China (NSFC))	35	5	5	3	6	DOVE MEDICAL PRESS LTD	ALBANY	J PAIN RES		2021	14		681	691		10.2147/JPR.S288289		11	Clinical Neurology	Science Citation Index Expanded (SCI-EXPANDED)	Neurosciences & Neurology	QY4AD	33732014	Green Published, gold	2022-05-29	WOS:000629983400001
J	Guo, W; Wan, XY; Ma, L; Zhang, JC; Hashimoto, K		Abnormalities in the composition of the gut microbiota in mice after repeated administration of DREADD ligands	BRAIN RESEARCH BULLETIN	English	Article	Clozapine N-oxide; Compound 21; Gut microbiota	Designer Receptors Exclusively Activated by Designer Drugs (DREADDs) are known as genetically modified Gprotein-coupled receptors (GPCRs), which can be activated by synthetic ligands such as clozapine N-oxide (CNO) and DREADD agonist 21 (compound 21: C21). The brain-gut-microbiota axis has a crucial role in bidirectional interactions between the brain and the gastrointestinal microbiota. In this …	AMED, Japan [JP20dm0107119]; MEXT [21H00184]	AMED, Japan; MEXT(Ministry of Education, Culture, Sports, Science and Technology, Japan (MEXT))	46	1	1	5	7	PERGAMON-ELSEVIER SCIENCE LTD	OXFORD	BRAIN RES BULL	AUG	2021	173		66	73		10.1016/j.brainresbull.2021.05.012		8	Neurosciences	Science Citation Index Expanded (SCI-EXPANDED)	Neurosciences & Neurology	SP8LH	34004259		2022-05-29	WOS:000659914100008
J	Aardema, ND; Rodriguez, DM; Van Wettere, AJ; Benninghoff, AD; Hintze, KJ		The Western Dietary Pattern Combined with Vancomycin-Mediated Changes to the Gut Microbiome Exacerbates Colitis Severity and Colon Tumorigenesis	NUTRIENTS	English	Article	vancomycin; Western diet; colitis; inflammation; colorectal cancer; bacteria; gut microbiome	Previous work by our group using a mouse model of inflammation-associated colorectal cancer (CAC) showed that the total Western diet (TWD) promoted colon tumor development. Others have also shown that vancomycin-mediated changes to the gut microbiome increased colorectal cancer (CRC). Therefore, the objective of this study was to determine the impact of vancomycin on colon tumorigenesis in the co…	Hatch Capacity Project [UTA-01178, UTA-01205]; USDA National Institute of Food and Agriculture	Hatch Capacity Project; USDA National Institute of Food and Agriculture(United States Department of Agriculture (USDA))	72	1	1	2	5	MDPI	BASEL	NUTRIENTS	MAR	2021	13	3			881	10.3390/nu13030881		21	Nutrition & Dietetics	Science Citation Index Expanded (SCI-EXPANDED)	Nutrition & Dietetics	RE2PJ	33803094	Green Published, gold	2022-05-29	WOS:000634002600001
J	Khan, H; Liu, MK; Kayani, MUR; Ahmad, S; Liang, JD; Bai, XH		DNA phosphorothioate modification facilitates the dissemination of mcr-1 and bla(NDM-1) in drinking water supply systems	ENVIRONMENTAL POLLUTION	English	Article	DNA Phosphorothioate (PT) modifications; Drinking water; Chloramine disinfection; Antibiotic resistance genes; Mobilized colistin resistance (MCR) genes; New Delhi metallo-beta-lactamase (NDM) genes	The mechanism driving the dissemination of antibiotic resistance genes (ARGs) in drinking water supply systems (DWSSs) with multiple barriers remains poorly understood despite several recent efforts. Phosphorothioate (PT) modifications, governed by dndABCDE genes, occur naturally in various bacteria and involve the incorporation of sulfur into the DNA backbone. PT is regarded as a mild antioxidan…	Key Special Program of the Science and Technology for the Pollution Control and Treatment of Water Bodies [2017ZX07207-004]; National Natural Science Foundation of China [51878406]	Key Special Program of the Science and Technology for the Pollution Control and Treatment of Water Bodies; National Natural Science Foundation of China(National Natural Science Foundation of China (NSFC))	79	4	4	8	14	ELSEVIER SCI LTD	OXFORD	ENVIRON POLLUT	2022-01-01	2021	268				115799	10.1016/j.envpol.2020.115799		10	Environmental Sciences	Science Citation Index Expanded (SCI-EXPANDED)	Environmental Sciences & Ecology	PH6XN	33162214		2022-05-29	WOS:000600553000030
J	Rousta, E; Oka, A; Liu, B; Herzog, J; Bhatt, AP; Wang, J; Najafi, MBH; Sartor, RB		The Emulsifier Carboxymethylcellulose Induces More Aggressive Colitis in Humanized Mice with Inflammatory Bowel Disease Microbiota Than Polysorbate-80	NUTRIENTS	English	Article	dietary emulsifiers; gut microbiota; experimental colitis; humanized mice; inflammatory bowel diseases; dietary triggers	Commonly used synthetic dietary emulsifiers, including carboxymethylcellulose (CMC) and polysorbate-80 (P80), promote intestinal inflammation. We compared abilities of CMC vs. P80 to potentiate colitis and impact human microbiota in an inflammatory environment using a novel colitis model of ex-germ-free (GF) IL10(-/-) mice colonized by pooled fecal transplant from three patients with active infla…	US Public Health Service National Institutes of Health (NIH) [P01DK094779, P40OD010995, P30DK034987, K01DK119582]; Crohns and Colitis Foundation [2434, 708151]	US Public Health Service National Institutes of Health (NIH)(United States Department of Health & Human ServicesNational Institutes of Health (NIH) - USA); Crohns and Colitis Foundation	41	2	2	2	2	MDPI	BASEL	NUTRIENTS	OCT	2021	13	10			3565	10.3390/nu13103565		16	Nutrition & Dietetics	Science Citation Index Expanded (SCI-EXPANDED)	Nutrition & Dietetics	WU2XZ	34684567	Green Published	2022-05-29	WOS:000716414400001
J	Zhou, Y; Duan, L; Zeng, Y; Niu, LL; Pu, Y; Jacobs, JP; Chang, CDC; Wang, J; Khalique, A; Pan, KC; Fang, J; Jing, B; Zeng, D; Ni, XQ		The Panda-Derived Lactobacillus plantarum G201683 Alleviates the Inflammatory Response in DSS-Induced Panda Microbiota-Associated Mice	FRONTIERS IN IMMUNOLOGY	English	Article	giant panda; inflammation; Lactobacillus; microbiota; intestinal barrier	Intestinal diseases are one of the main causes of captive giant panda death. Their special dietary habits and gastrointestinal tract structure often lead to intestinal epithelium damage and secondary intestinal infection. The captive giant panda is predisposed to suffer from microbiota dysbiosis due to long-term artificial feeding and antibiotic misuse. However, there are few reported probiotics …	National Natural Science Foundation of China [31970503]; Project of Chengdu Giant Panda Breeding Research Foundation [CPF 2014-15]; China Scholarship Council [201906910016]	National Natural Science Foundation of China(National Natural Science Foundation of China (NSFC)); Project of Chengdu Giant Panda Breeding Research Foundation; China Scholarship Council(China Scholarship Council)	67	0	0	5	5	FRONTIERS MEDIA SA	LAUSANNE	FRONT IMMUNOL	2022-12-08	2021	12				747045	10.3389/fimmu.2021.747045		19	Immunology	Science Citation Index Expanded (SCI-EXPANDED)	Immunology	XS2MJ	34956180	Green Published, gold	2022-05-29	WOS:000732749100001
J	Bai, YQ; Li, YH; Marion, T; Tong, YL; Zaiss, MM; Tang, ZG; Zhang, QP; Liu, Y; Luo, YB		Resistant starch intake alleviates collagen-induced arthritis in mice by modulating gut microbiota and promoting concomitant propionate production	JOURNAL OF AUTOIMMUNITY	English	Article	Resistant starch; Collagen-induced arthritis (CIA); Short-chain fatty acids (SCFAs); Treg cells; IL-10	Gut dysbiosis precedes clinic symptoms in rheumatoid arthritis (RA) and has been implicated in the initiation and persistence of RA. The early treatment of RA is critical to better clinical outcome especially for joint destruction. Although dietary interventions have been reported to be beneficial for RA patients, it is unclear to whether diet-induced gut microbiome changes can be a preventive st…	National Natural Science Foundation of China, China [81770101, 81403041]; Outstanding interdisciplinary project of West China Hospital, Sichuan University, China [ZYJC18024]; National Key Research and Development Program of China, China [2016YFC0906201]; 1.3.5 project for disciplines of excellence, West China Hospital, Sichuan University, China [ZYJC18003]; West China Hospital, Sichuan University…	National Natural Science Foundation of China, China(National Natural Science Foundation of China (NSFC)); Outstanding interdisciplinary project of West China Hospital, Sichuan University, China; National Key Research and Development Program of China, China; 1.3.5 project for disciplines of excellence, West China Hospital, Sichuan University, China; West China Hospital, Sichuan University, China(S…	60	10	10	8	29	ACADEMIC PRESS LTD- ELSEVIER SCIENCE LTD	LONDON	J AUTOIMMUN	JAN	2021	116				102564	10.1016/j.jaut.2020.102564		12	Immunology	Science Citation Index Expanded (SCI-EXPANDED)	Immunology	PM1EN	33203617		2022-05-29	WOS:000603551400007
J	Liu, Y; Jin, X; Tian, L; Jian, ZY; Ma, YC; Cheng, L; Cui, YQ; Li, H; Sun, Q; Wang, KJ		Lactiplantibacillus plantarum Reduced Renal Calcium Oxalate Stones by Regulating Arginine Metabolism in Gut Microbiota	FRONTIERS IN MICROBIOLOGY	English	Article	renal stones; calcium oxalate; Lactiplantibacillus plantarum; gut microbiota; arginine	Renal calcium oxalate (CaOx) stones are a common kidney disease. There are few methods for reducing the formation of these stones. However, the potential of probiotics for reducing renal stones has received increasing interest. We previously isolated a strain of Lactiplantibacillus plantarum N-1 from traditional cheese in China. This study aimed to investigate the effects of N-1 on renal CaOx cry…	National Natural Science Foundation of China [81970602, 81770703]; Foundation of Science and Technology Department of Sichuan Province [2018SZ0118, 2019YFS0281]; 1.3.5 Project for Disciplines of Excellence, West China Hospital, Sichuan University [ZYJC18015]; National Key Research and Development Projects [SQ2019YFE010495]; West China Hospital, Sichuan University [2019HXBH087]	National Natural Science Foundation of China(National Natural Science Foundation of China (NSFC)); Foundation of Science and Technology Department of Sichuan Province; 1.3.5 Project for Disciplines of Excellence, West China Hospital, Sichuan University; National Key Research and Development Projects; West China Hospital, Sichuan University(Sichuan University)	43	1	1	3	6	FRONTIERS MEDIA SA	LAUSANNE	FRONT MICROBIOL	2022-09-24	2021	12				743097	10.3389/fmicb.2021.743097		11	Microbiology	Science Citation Index Expanded (SCI-EXPANDED)	Microbiology	WE8WH	34630369	Green Published, gold	2022-05-29	WOS:000705899200001
J	Lingbeek, MM; Borewicz, K; Febery, E; Han, YM; Doelman, J; van Kuijk, SJA		Short-chain fatty acid administration via water acidifier improves feed efficiency and modulates fecal microbiota in weaned piglets	JOURNAL OF ANIMAL SCIENCE	English	Article	growth performance; microbiota; short-chain fatty acids; water acidifier; weaned piglets	This study examined the effect of a water acidifier containing free and buffered short-chain fatty acids (SCFA-WA) on growth performance and microbiota of weaned piglets. In total, 192 male piglets, approximately 4 wk of age, were allocated to 24 pens (12 per treatment) with 8 piglets per pen. The piglets received either regular drinking water (negative control) or drinking water with the acidifi…			38	0	0	2	3	OXFORD UNIV PRESS INC	CARY	J ANIM SCI	NOV	2021	99	11			skab307	10.1093/jas/skab307		9	Agriculture, Dairy & Animal Science	Science Citation Index Expanded (SCI-EXPANDED)	Agriculture	XU6JL	34679178		2022-05-29	WOS:000734368400010
J	Sun, Y; Kang, K; Li, YL; Sang, LX; Chang, B		Tea polyphenols protect mice from acute ethanol-Induced liver injury by modulating the gut microbiota and short-chain fatty acids	JOURNAL OF FUNCTIONAL FOODS	English	Article	Tea polyphenols; Ethanol; Gut microbiota; Liver injury; Intestinal barrier	Tea polyphenols (TPs), naturally present in green tea, have a number of health benefits, such as alleviating hepatic injury. Acute alcoholic liver injury was induced in C57BL/6 male mice by 40% ethanol gavage, and the mice were treated with distilled water or TPs in drinking water (4 g/L, 0.4%) for 8 weeks. The results demonstrated that TPs intake alleviated acute alcoholic liver injury and modul…	National Natural Sci-entific Foundation of China [81400618]; Young and middle-aged innovative talent support plan of Shenyang [RC170446]; Higher education Innovative talent support project of Liao Ning Province [2018-478]; Shenyang Science and Tech-nology Project [20-205-4-096]	National Natural Sci-entific Foundation of China(National Natural Science Foundation of China (NSFC)); Young and middle-aged innovative talent support plan of Shenyang; Higher education Innovative talent support project of Liao Ning Province; Shenyang Science and Tech-nology Project	84	0	0	36	36	ELSEVIER	AMSTERDAM	J FUNCT FOODS	DEC	2021	87				104865	10.1016/j.jff.2021.104865		10	Food Science & Technology; Nutrition & Dietetics	Science Citation Index Expanded (SCI-EXPANDED)	Food Science & Technology; Nutrition & Dietetics	XH8JL		gold	2022-05-29	WOS:000725674100001
J	Liu, HH; Bian, ZB; Zhang, QY; Xiao, ZP; Cao, Y; Sun, XD; Qin, Y; Mao, LZ; Chu, XW; Liao, WZ; Zha, LY; Sun, SX		Sodium butyrate inhibits colitis-associated colorectal cancer through preventing the gut microbiota dysbiosis and reducing the expression of NLRP3 and IL-1 beta	JOURNAL OF FUNCTIONAL FOODS	English	Article	Sodium butyrate; AOM; DSS; Gut microbiota; NLRP3; Colorectal cancer	Sodium butyrate (NaB) is a by-product of dietary fiber that has an anti-tumor effect on colorectal cancer (CRC). The aim of this study was to explore the effect of NaB on tumor and colitis using a colitis-associated colorectal cancer (CAC) model. CAC model was induced in mice by administration of azoxymethane (AOM) and dextran sulfate sodium salt (DSS). 0.1 M NaB in drinking water, or intraperito…	National Natural Science Foundation of China [81773429]	National Natural Science Foundation of China(National Natural Science Foundation of China (NSFC))	72	0	0	38	38	ELSEVIER	AMSTERDAM	J FUNCT FOODS	DEC	2021	87				104862	10.1016/j.jff.2021.104862		13	Food Science & Technology; Nutrition & Dietetics	Science Citation Index Expanded (SCI-EXPANDED)	Food Science & Technology; Nutrition & Dietetics	XH8JL		gold	2022-05-29	WOS:000725674100002
J	D'Ugo, E; Bruno, M; Mukherjee, A; Chattopadhyay, D; Giuseppetti, R; De Pace, R; Magurano, F		Characterization of microbial response to petroleum hydrocarbon contamination in a lacustrine ecosystem	ENVIRONMENTAL SCIENCE AND POLLUTION RESEARCH	English	Article	Lake Pertusillo; Petroleum hydrocarbon; Aromatic hydrocarbon degradation; Lake microbiome; Oil spill; Metagenomics; Freshwater ecosystem; Bioinformatics; Metabolic reconstruction; Sustainable use of waters	Microbiomes of freshwater basins intended for human use remain poorly studied, with very little known about the microbial response to in situ oil spills. Lake Pertusillo is an artificial freshwater reservoir in Basilicata, Italy, and serves as the primary source of drinking water for more than one and a half million people in the region. Notably, it is located in close proximity to one of the lar…			45	3	3	2	8	SPRINGER HEIDELBERG	HEIDELBERG	ENVIRON SCI POLLUT R	MAY	2021	28	20	26187	26196		10.1007/s11356-021-13885-8		10	Environmental Sciences	Science Citation Index Expanded (SCI-EXPANDED)	Environmental Sciences & Ecology	SJ0LS	33871774	Green Published, hybrid	2022-05-29	WOS:000641230000005
J	Yuan, XB; Zheng, JP; Ren, LS; Jiao, SM; Feng, C; Du, YG; Liu, HT		Glucosamine Ameliorates Symptoms of High-Fat Diet-Fed Mice by Reversing Imbalanced Gut Microbiota	FRONTIERS IN PHARMACOLOGY	English	Article	glucosamine; gut microbiota; diabetes mellitus; inflammation; high fat diet	Glucosamine (GlcN) is used as a supplement for arthritis and joint pain and has been proved to have effects on inflammation, cancer, and cardiovascular diseases. However, there are limited studies on the regulatory mechanism of GlcN against glucose and lipid metabolism disorder. In this study, we treated high-fat diet (HFD)-induced diabetic mice with GlcN (1 mg/ml, in drinking water) for five mon…	National Key Research and Development Program of China [2019YFD0902000]; National Natural Science Fund, China [31570801, 31500747]	National Key Research and Development Program of China; National Natural Science Fund, China(National Natural Science Foundation of China (NSFC))	37	2	2	2	6	FRONTIERS MEDIA SA	LAUSANNE	FRONT PHARMACOL	2022-06-03	2021	12				694107	10.3389/fphar.2021.694107		13	Pharmacology & Pharmacy	Science Citation Index Expanded (SCI-EXPANDED)	Pharmacology & Pharmacy	ST1GK	34149435	gold, Green Published	2022-05-29	WOS:000662198300001
J	Xin, JG; Wang, HS; Sun, N; Bughio, S; Zeng, D; Li, LX; Wang, YY; Khalique, A; Zeng, Y; Pan, KC; Jing, B; Ma, HL; Bai, Y; Ni, XQ		Probiotic alleviate fluoride-induced memory impairment by reconstructing gut microbiota in mice	ECOTOXICOLOGY AND ENVIRONMENTAL SAFETY	English	Article	Fluoride; Lactobacillus johnsonii BS15; Memory dysfunction; Hippocampus; Gut microbiota	Fluoride which is widespread in our environment and food due to its geological origin and industrial pollution has been identified as a developmental neurotoxicant. Gut-brain axis provides new insight into brain-derived injury. We previously found the psychoactive effects of a probiotic strain, Lactobacillus johnsonii BS15 against fluoride-induced memory dysfunction in mice by modulating the gut-…	Sichuan Science and Technology Program [2021YFH0097, 2019YHF0060]	Sichuan Science and Technology Program	57	3	3	4	18	ACADEMIC PRESS INC ELSEVIER SCIENCE	SAN DIEGO	ECOTOX ENVIRON SAFE	2022-06-01	2021	215				112108	10.1016/j.ecoenv.2021.112108		14	Environmental Sciences; Toxicology	Science Citation Index Expanded (SCI-EXPANDED)	Environmental Sciences & Ecology; Toxicology	RJ9RI	33799132	gold, Green Submitted	2022-05-29	WOS:000637942500002
J	Hua, YL; Jia, YQ; Zhang, XS; Yuan, ZW; Ji, P; Hu, JJ; Wei, YM		Baitouweng Tang ameliorates DSS-induced ulcerative colitis through the regulation of the gut microbiota and bile acids via pathways involving FXR and TGR5	BIOMEDICINE & PHARMACOTHERAPY	English	Article	BTWT; BAs; Gut microbiota; FXR; TGR5	In China, Baitouweng Tang (BTWT) is a commonly prescribed remedy for the treatment of ulcerative colitis (UC). Herein, the present study aims to assess the anti-colitis activity of BTWT and its underlying mechanisms in UC BALB/c mice. Induction of UC in BALB/c mice was carried out by adding 3.5% DSS in the drinking water of underlined mice. After UC induction, the mice were administrated with BTW…	Natural Science Foundation of China [31860717]; Science and Technology Innovation Fund of Gansu Agricultural University (Youth Tutor Support Fund) [GAU-QDFC-2018-08]; Fuxi Foundation of Gansu Agricultural University [Gaufx-03J01]; China Agricultural Research System-37 (CARS-37)	Natural Science Foundation of China(National Natural Science Foundation of China (NSFC)); Science and Technology Innovation Fund of Gansu Agricultural University (Youth Tutor Support Fund); Fuxi Foundation of Gansu Agricultural University; China Agricultural Research System-37 (CARS-37)	56	6	8	12	38	ELSEVIER FRANCE-EDITIONS SCIENTIFIQUES MEDICALES ELSEVIER	ISSY-LES-MOULINEAUX	BIOMED PHARMACOTHER	MAY	2021	137				111320	10.1016/j.biopha.2021.111320		14	Medicine, Research & Experimental; Pharmacology & Pharmacy	Science Citation Index Expanded (SCI-EXPANDED)	Research & Experimental Medicine; Pharmacology & Pharmacy	RF3QI	33578232	gold	2022-05-29	WOS:000634755800005
J	Bouassi, T; Libanio, D; Mesa, MD; Oke, OE; Gil, AH; Tona, K; Ameyapoh, Y		Supplementation with liquid whey and ACIDAL (R) ML in drinking water affect gut pH and microflora and productive performance in laying hens	BRITISH POULTRY SCIENCE	English	Article	Antibiotic; growth promoter; liquid whey; ACIDAL&#174; ML; gut microbiota	1. As the use of antibiotics as growth promoters has been banned in many regions, there has been an on-going search for possible alternative compounds, such as prebiotics and organic acids. 2. This study was conducted to investigate the influence of liquid whey (LW) and organic acid (ACIDAL (R) ML) supplementation on performance, eggs characteristics, gut pH and health status in laying hens. 3. S…	World Bank grant International Development of Association (IDA) 5424 through the Centre d'Excellence Regional sur les Sciences Aviaires (CERSA) of University of Lome (Togo)	World Bank grant International Development of Association (IDA) 5424 through the Centre d'Excellence Regional sur les Sciences Aviaires (CERSA) of University of Lome (Togo)	46	1	1	2	11	TAYLOR & FRANCIS LTD	ABINGDON	BRIT POULTRY SCI	2022-01-02	2021	62	1	138	146		10.1080/00071668.2020.1824291		9	Agriculture, Dairy & Animal Science	Science Citation Index Expanded (SCI-EXPANDED)	Agriculture	PR5SA	32972211		2022-05-29	WOS:000582350200001
J	Galosi, L; Desantis, S; Roncarati, A; Robino, P; Bellato, A; Nebbia, P; Ferrocino, I; Santamaria, N; Biagini, L; Filoni, L; Attili, AR; Rossi, G		Positive Influence of a Probiotic Mixture on the Intestinal Morphology and Microbiota of Farmed Guinea Fowls (Numida meleagris)	FRONTIERS IN VETERINARY SCIENCE	English	Article	guinea fowl; Numida meleagris; Slab51 (R); intestinal morphology; intestinal microbiota	To understand the effectiveness of a probiotic mixture on intestinal morphology, mucus layer composition, and cecal microbiota diversity, 40 10-day-old Guinea fowls (Numida meleagris) were assigned to two groups: the control group (C), receiving drinking water, and the treated group (P), receiving water plus a commercial multi-strain probiotic (Slab51 (R), 2 x 10(11) CFU/L). Birds were slaughtere…			84	0	0	5	5	FRONTIERS MEDIA SA	LAUSANNE	FRONT VET SCI	2022-10-29	2021	8				743899	10.3389/fvets.2021.743899		13	Veterinary Sciences	Science Citation Index Expanded (SCI-EXPANDED)	Veterinary Sciences	WW6JM	34778432	Green Published, gold, Green Submitted	2022-05-29	WOS:000718020300001
J	Wei, ZT; Cui, YQ; Tian, L; Liu, Y; Yu, Y; Jin, X; Li, H; Wang, KJ; Sun, Q		Probiotic Lactiplantibacillus plantarum N-1 could prevent ethylene glycol-induced kidney stones by regulating gut microbiota and enhancing intestinal barrier function	FASEB JOURNAL	English	Article	gut microbiota; hyperoxaluria; intestinal barrier; intestinal inflammation; kidney stones; Lactiplantibacillus plantarum N-1	Defective permeability barrier is considered to be an incentive of hyperuricemia, however, the link between them has not been proven. Here, we evaluated the potential preventive effects of Lactiplantibacillus plantarum N-1 (LPN1) on gut microbiota and intestinal barrier function in rats with hyperoxaluria-induced kidney stones. Male rats were supplied with 1% ethylene glycol (EG) dissolved in dri…	National Natural Science Foundation of China (NSFC) [81770703, 81970602]; National Key Research and Development Projects of China [2019YFE0103800]; International Research and Development Program of Sichuan [2019YFH0113, 2021YFH0060]; 1.3.5 Project for Disciplines of Excellence by the West China Hospital of Sichuan University [ZYGD18011, ZYJC18015]; West China Hospital, Sichuan University [2019HXB…	National Natural Science Foundation of China (NSFC)(National Natural Science Foundation of China (NSFC)); National Key Research and Development Projects of China; International Research and Development Program of Sichuan; 1.3.5 Project for Disciplines of Excellence by the West China Hospital of Sichuan University; West China Hospital, Sichuan University(Sichuan University)	53	3	3	11	20	WILEY	HOBOKEN	FASEB J	NOV	2021	35	11			e21937	10.1096/fj.202100887RR		15	Biochemistry & Molecular Biology; Biology; Cell Biology	Science Citation Index Expanded (SCI-EXPANDED)	Biochemistry & Molecular Biology; Life Sciences & Biomedicine - Other Topics; Cell Biology	WN8IK	34606628	hybrid	2022-05-29	WOS:000712009200001
J	Reitter, C; Neuhaus, K; Hugler, M		Draft Genome Sequences of Enterobacter spp., Lelliottia spp., and Serratia spp., Coliform Bacteria from Drinking Water Reservoirs and Lakes	MICROBIOLOGY RESOURCE ANNOUNCEMENTS	English	Article		Surface waters are a major source for drinking water production. Therefore, it is essential to examine microbial processes within the water bodies, such as mass proliferations of coliform bacteria. Here, we report the draft genome sequences of Enterobacter spp., Lelliottia spp., and Serratia spp. isolated from drinking water reservoirs and lakes.	German Federal Ministry of Education and Research (BMBF) [02WGR1426A-G]; German Technical and Scientific Association for Gas and Water (DVGW) [W 201720, W 201823]	German Federal Ministry of Education and Research (BMBF)(Federal Ministry of Education & Research (BMBF)); German Technical and Scientific Association for Gas and Water (DVGW)	19	1	1	1	1	AMER SOC MICROBIOLOGY	WASHINGTON	MICROBIOL RESOUR ANN	AUG	2021	10	32			e00622-21	10.1128/MRA.00622-21		3	Microbiology	Emerging Sources Citation Index (ESCI)	Microbiology	UC5TQ	34382825	Green Published, gold	2022-05-29	WOS:000686588200007
J	He, C; Keren, R; Whittaker, ML; Farag, IF; Doudna, JA; Cate, JHD; Banfield, JF		Genome-resolved metagenomics reveals site-specific diversity of episymbiotic CPR bacteria and DPANN archaea in groundwater ecosystems	NATURE MICROBIOLOGY	English	Article		Candidate phyla radiation (CPR) bacteria and DPANN archaea are unisolated, small-celled symbionts that are often detected in groundwater. The effects of groundwater geochemistry on the abundance, distribution, taxonomic diversity and host association of CPR bacteria and DPANN archaea has not been studied. Here, we performed genome-resolved metagenomic analysis of one agricultural and seven pristi…	Camille and Henry Dreyfus Foundation Postdoctoral Fellowship in Environmental Chemistry; Allen Foundation; Chan Zuckerberg BioHub; Innovative Genomics Institute	Camille and Henry Dreyfus Foundation Postdoctoral Fellowship in Environmental Chemistry; Allen Foundation; Chan Zuckerberg BioHub; Innovative Genomics Institute	88	18	19	27	50	NATURE PORTFOLIO	BERLIN	NAT MICROBIOL	MAR	2021	6	3	354	#ERROR!		10.1038/s41564-020-00840-5		23	Microbiology	Science Citation Index Expanded (SCI-EXPANDED)	Microbiology	QM6WM	33495623	hybrid, Green Published	2022-05-29	WOS:000611496200002
J	Thangamani, S; Monasky, R; Lee, JK; Antharam, V; HogenEsch, H; Hazbun, TR; Jin, Y; Gu, HW; Guo, GCL		Bile Acid Regulates the Colonization and Dissemination of Candida albicans from the Gastrointestinal Tract by Controlling Host Defense System and Microbiota	JOURNAL OF FUNGI	English	Article	bile acid metabolites; fungal colonization and dissemination; microbiota; host defense system	Candida albicans (CA), a commensal and opportunistic eukaryotic organism, frequently inhabits the gastrointestinal (GI) tract and causes life-threatening infections. Antibiotic-induced gut dysbiosis is a major risk factor for increased CA colonization and dissemination from the GI tract. We identified a significant increase of taurocholic acid (TCA), a major bile acid in antibiotic-treated mice s…	Midwestern University; Purdue University	Midwestern University; Purdue University	119	0	0	2	2	MDPI	BASEL	J FUNGI	DEC	2021	7	12			1030	10.3390/jof7121030		17	Microbiology; Mycology	Science Citation Index Expanded (SCI-EXPANDED)	Microbiology; Mycology	YA2PP	34947012	gold, Green Submitted, Green Published	2022-05-29	WOS:000738181900001
J	Shu, XB; Li, M; Cao, Y; Li, CL; Zhou, WJ; Ji, G; Zhang, L		Berberine Alleviates Non-alcoholic Steatohepatitis Through Modulating Gut Microbiota Mediated Intestinal FXR Activation	FRONTIERS IN PHARMACOLOGY	English	Article	berberine; non-alcoholic steatohepatitis (NASH); gut microbiota; bile acids; farnesoid X receptor (FXR)	Berberine is a natural plant alkaloid isolated from a diverse range of genera, it obtains anti-inflammatory, anti-obesity, and hepatoprotective properties, and is a promising agent for non-alcoholic steatohepatitis (NASH). Farnesoid X receptor (FXR) is a bile acid receptor and a drug target for NASH, however, the underlying mechanisms of berberine on regulating FXR are still unknown. In the prese…	National Natural Science Foundation of China [81774084, 81804020]	National Natural Science Foundation of China(National Natural Science Foundation of China (NSFC))	39	0	0	5	6	FRONTIERS MEDIA SA	LAUSANNE	FRONT PHARMACOL	2022-09-17	2021	12				750826	10.3389/fphar.2021.750826		13	Pharmacology & Pharmacy	Science Citation Index Expanded (SCI-EXPANDED)	Pharmacology & Pharmacy	WV6JB	34603061	gold, Green Published	2022-05-29	WOS:000717339900001
J	Miguela-Villoldo, P; Moreno, MA; Rebollada-Merino, A; Rodriguez-Bertos, A; Hernandez, M; Rodriguez-Lazaro, D; Gallardo, A; Quesada, A; Goyache, J; Dominguez, L; Ugarte-Ruiz, M		Colistin Selection of the Mcr-1 Gene in Broiler Chicken Intestinal Microbiota	ANTIBIOTICS-BASEL	English	Article	colistin; mcr-1; Salmonella; in vivo assay; real-time PCR quantification; microbiota; chicks	Colistin has a long story of safe use in animals for the treatment and prevention of certain bacterial diseases. Nevertheless, the first description of the mcr-1 gene showed that colistin resistance can spread by horizontal gene transfer and changed the landscape. This study aimed to assess the effect of colistin administration on the dispersion of resistance in the microbiota of day-old broiler …	Spanish Ministry of Economy, Industry, and Competitiveness [AGL2016-74882-C3]; FPI Programme from the Spanish Ministry of Science, Innovation, and Universities [BES-2017-080264]; European Social Fund; Youth Employment Initiative (YEI) [PEJ-2017-TL/BIO-7114]; Junta de Extremadura; FEDER in Spain [IB16073, GR15075]; Autonomous Community of Madrid [S2013/ABI-2747]; Spanish Ministry of Agriculture, F…	Spanish Ministry of Economy, Industry, and Competitiveness(Spanish Government); FPI Programme from the Spanish Ministry of Science, Innovation, and Universities; European Social Fund(European Social Fund (ESF)); Youth Employment Initiative (YEI); Junta de Extremadura; FEDER in Spain; Autonomous Community of Madrid; Spanish Ministry of Agriculture, Fishing, and Food	31	0	0	0	1	MDPI	BASEL	ANTIBIOTICS-BASEL	JUN	2021	10	6			677	10.3390/antibiotics10060677		10	Infectious Diseases; Pharmacology & Pharmacy	Science Citation Index Expanded (SCI-EXPANDED)	Infectious Diseases; Pharmacology & Pharmacy	SX6NI	34198813	Green Published, Green Accepted	2022-05-29	WOS:000665318800001
J	Almaiman, L; Aljomah, A; Bineid, M; Aljeldah, FM; Aldawsari, F; Liebmann, B; Lomako, I; Sexlinger, K; Alarfaj, R		The occurrence and dietary intake related to the presence of microplastics in drinking water in Saudi Arabia	ENVIRONMENTAL MONITORING AND ASSESSMENT	English	Article	Plastic pollution; Microplastics; Human health risks; Dietary intake; Bottled water	The implications and health effects of microplastics (MPs) ingestion are still unclear, yet researchers and organizations around the world are increasingly examining the levels of microplastics and nanoplastics in the environment. This study investigated the presence and the quantity of microplastics in bottled and tap water from five regions in Saudi Arabia and estimated the dietary intake of mi…	Saudi Food and Drug Authority	Saudi Food and Drug Authority	49	4	4	21	27	SPRINGER	DORDRECHT	ENVIRON MONIT ASSESS	JUL	2021	193	7			390	10.1007/s10661-021-09132-9		13	Environmental Sciences	Science Citation Index Expanded (SCI-EXPANDED)	Environmental Sciences & Ecology	ZC2JN	34100164		2022-05-29	WOS:000757352900003
J	Goulding, DR; Myers, PH; Dickerson, AB; Comins, MM; Wiltshire, RA; Blankenship-Paris, TL		Comparative Efficacy of Two Types of Antibiotic Mixtures in Gut Flora Depletion in Female C57BL/6 Mice	COMPARATIVE MEDICINE	English	Article		Over the last decade, interest in the role of the microbiome in health and disease has increased. The use of germ-free animals and depletion of the microbial flora using antimicrobials are 2 methods commonly used to study the microbiome in laboratory mice. Germ-free mice are born, raised, and studied in isolators in the absence of any known microbes; however, the equipment, supplies, and training…	Intramural Research Program of the NIH, National Institute of Environmental Health Sciences	Intramural Research Program of the NIH, National Institute of Environmental Health Sciences(United States Department of Health & Human ServicesNational Institutes of Health (NIH) - USANIH National Institute of Environmental Health Sciences (NIEHS))	42	1	1	0	2	AMER ASSOC LABORATORY ANIMAL SCIENCE	MEMPHIS	COMPARATIVE MED	JUN	2021	71	3	203	209		10.30802/AALAS-CM-21-000023		7	Veterinary Sciences; Zoology	Science Citation Index Expanded (SCI-EXPANDED)	Veterinary Sciences; Zoology	SX9QV	34088363	Green Published	2022-05-29	WOS:000665532500002
J	Xin, JG; Sun, N; Wang, HS; Ma, HL; Wu, BY; Li, LX; Wang, YN; Huang, H; Zeng, D; Bai, XQ; Chen, AL; Gong, SH; Ni, XQ; Bai, Y		Preventive effects of Lactobacillus johnsonii on the renal injury of mice induced by high fluoride exposure: Insights from colonic microbiota and co-occurrence network analysis	ECOTOXICOLOGY AND ENVIRONMENTAL SAFETY	English	Article	16S rRNA sequencing; Fluoride-induced damages; Gut microbota; Probiotics; Renal dysfunction	Fluoride (F) exposure was widely reported to be associated with renal diseases. Since absorbed F enters the organism from drinking water mostly through the gastrointestinal tract, investigating changes of gut microbes may have profound implications for the prevention of chronic F exposure because increasing evidence supported the existence of the gut-kidney axis. In the present study, we aimed to…	Sichuan Science and Technology Program [2021YFH0097]; Natural Science Foundation of Guangdong Province, China [2019A1515012115]; President Foundation of Nanfang Hospital, Southern Medical University [2020Z008]	Sichuan Science and Technology Program; Natural Science Foundation of Guangdong Province, China(National Natural Science Foundation of Guangdong Province); President Foundation of Nanfang Hospital, Southern Medical University	46	1	1	6	6	ACADEMIC PRESS INC ELSEVIER SCIENCE	SAN DIEGO	ECOTOX ENVIRON SAFE	2022-12-25	2021	228				113006	10.1016/j.ecoenv.2021.113006		14	Environmental Sciences; Toxicology	Science Citation Index Expanded (SCI-EXPANDED)	Environmental Sciences & Ecology; Toxicology	YJ0QE	34826728	gold	2022-05-29	WOS:000744243100003
J	Jin, CY; Weng, Y; Zhang, Y; Bao, ZW; Yang, GL; Fu, ZW; Jin, YX		Propamocarb exposure has the potential to accelerate the formation of atherosclerosis in both WT and ApoE-/- mice accompanied by gut microbiota dysbiosis	SCIENCE OF THE TOTAL ENVIRONMENT	English	Article	Propamocarb; Atherosclerosis; Lipid metabolism; Gut microbiota; ApoE knockout mice	Propamocarb is a systemic carbamate fungicide used to fight diseases. The effect of propamocarb on the formation of atherosclerosis was evaluated in wild-type (WT) and ApoE knockout (ApoE-/-) mice. C57BL/6 J WT mice were fed control diet or high-fat diet (HFD) with 20 mg/L propamocarb in drinking water for 24 weeks. Propamocarb significantly increased the serum levels of triglyceride, cholesterol…	National Key Research and Development Program of China [2017YFD0200503]; Zhejiang Provincial Natural Science Foundation of China [LZ20B070002]; Scientific Research Fund of Zhejiang Provincial Education Department [Y201940954]	National Key Research and Development Program of China; Zhejiang Provincial Natural Science Foundation of China(Natural Science Foundation of Zhejiang Province); Scientific Research Fund of Zhejiang Provincial Education Department	56	0	0	6	14	ELSEVIER	AMSTERDAM	SCI TOTAL ENVIRON	2022-12-15	2021	800				149602	10.1016/j.scitotenv.2021.149602		11	Environmental Sciences	Science Citation Index Expanded (SCI-EXPANDED)	Environmental Sciences & Ecology	WJ7YY	34426332		2022-05-29	WOS:000709257300006
J	Hsu, CN; Hou, CY; Lee, CT; Chang-Chien, GP; Lin, S; Tain, YL		Maternal 3,3-Dimethyl-1-Butanol Therapy Protects Adult Male Rat Offspring against Hypertension Programmed by Perinatal TCDD Exposure	NUTRIENTS	English	Article	gut microbiota; aryl hydrocarbon receptor; 3; 3-dimethyl-1-butanol; developmental origins of health and disease (DOHaD); hypertension; short chain fatty acid; trimethylamine-N-oxide; 2; 3; 7; 8-tetrachlorodibenzo-p-dioxin (TCDD); renin-angiotensin system	Maternal exposure to environmental pollutants affects fetal development, which can result in hypertension in adulthood. Gut microbiota-derived metabolite trimethylamine (TMA), trimethylamine-N-oxide (TMAO), and short chain fatty acids (SCFAs) have been associated with hypertension. We tested a hypothesis that maternal 3,3-Dimethyl-1-butanol (DMB, a TMA inhibitor) therapy prevents 2,3,7,8-tetrachl…	Ministry of Science and Technology, Taiwan [MOST 107-2314-B-182-045- MY3]	Ministry of Science and Technology, Taiwan(Ministry of Science and Technology, Taiwan)	30	1	1	2	3	MDPI	BASEL	NUTRIENTS	SEP	2021	13	9			3041	10.3390/nu13093041		13	Nutrition & Dietetics	Science Citation Index Expanded (SCI-EXPANDED)	Nutrition & Dietetics	UX9QM	34578924	Green Published	2022-05-29	WOS:000701170500001
J	Liu, YZ; Li, YJ; Loh, YW; Singer, J; Zhu, WP; Macia, L; Mackay, CR; Wang, WM; Chadban, SJ; Wu, HL		Fiber Derived Microbial Metabolites Prevent Acute Kidney Injury Through G-Protein Coupled Receptors and HDAC Inhibition	FRONTIERS IN CELL AND DEVELOPMENTAL BIOLOGY	English	Article	gut microbiota; acute kidney injury; dietary fiber; prebiotic; SCFA	Short-chain fatty acids (SCFA) derived from gut microbial fermentation of fiber have been shown to exert anti-inflammatory and immune-modulatory properties in acute kidney injury (AKI). However the direct mechanistic link between SCFAs, diet and the gut microbiome is yet to be established. Using the murine model of folic-acid nephropathy (FAN), we examined the effect of dietary fiber on developme…			58	7	7	7	13	FRONTIERS MEDIA SA	LAUSANNE	FRONT CELL DEV BIOL	2022-04-08	2021	9				648639	10.3389/fcell.2021.648639		17	Cell Biology; Developmental Biology	Science Citation Index Expanded (SCI-EXPANDED)	Cell Biology; Developmental Biology	RP8PD	33898439	Green Published, gold	2022-05-29	WOS:000641984300001
J	Zhang, A; Matsushita, M; Zhang, L; Wang, H; Shi, XJ; Gu, HW; Xia, ZG; Cui, JY		Cadmium exposure modulates the gut-liver axis in an Alzheimer's disease mouse model	COMMUNICATIONS BIOLOGY	English	Article		The human Apolipoprotein E4 (ApoE4) variant is the strongest known genetic risk factor for Alzheimer's disease (AD). Cadmium (Cd) has been shown to impair learning and memory at a greater extent in humanized ApoE4 knock-in (ApoE4-KI) mice as compared to ApoE3 (common allele)-KI mice. Here, we determined how cadmium interacts with ApoE4 gene variants to modify the gut-liver axis. Large intestinal …	DEOHS Environmental Health and Microbiome Initiative pilot project; National Institutes of Health [R01 ES025708, R01 ES030197, R01 GM111381, R01 ES026591, T32 ES015459, T32 ES007032, P30 ES007033, P42 ES004696]; University of Washington Sheldon Murphy Endowment	DEOHS Environmental Health and Microbiome Initiative pilot project; National Institutes of Health(United States Department of Health & Human ServicesNational Institutes of Health (NIH) - USA); University of Washington Sheldon Murphy Endowment	86	0	0	4	4	NATURE PORTFOLIO	BERLIN	COMMUN BIOL	2022-12-15	2021	4	1			1398	10.1038/s42003-021-02898-1		16	Biology; Multidisciplinary Sciences	Science Citation Index Expanded (SCI-EXPANDED)	Life Sciences & Biomedicine - Other Topics; Science & Technology - Other Topics	XP1DN	34912029	gold, Green Published	2022-05-29	WOS:000730613700002
J	Tomkovich, S; Taylor, A; King, J; Colovas, J; Bishop, L; McBride, K; Royzenblat, S; Lesniak, NA; Bergin, IL; Schloss, PD		An Osmotic Laxative Renders Mice Susceptible to Prolonged Clostridioides difficile Colonization and Hinders Clearance	MSPHERE	English	Article	Clostridioides difficile; colonization resistance; dysbiosis; microbiome	Antibiotics are a major risk factor for Clostridioides difficile infections (CDIs) because of their impact on the microbiota. However, nonantibiotic medications such as the ubiquitous osmotic laxative polyethylene glycol 3350 (PEG 3350) also alter the microbiota. Clinicians also hypothesize that PEG helps clear C diffidie. But whether PEG impacts CDI susceptibility and clearance is unclear. To ex…	National Institutes of Health [U01AI124255]; Michigan Institute for Clinical and Health Research Postdoctoral Translation Scholars Program (National Center for Advancing Translational Sciences) [UL1TR002240]	National Institutes of Health(United States Department of Health & Human ServicesNational Institutes of Health (NIH) - USA); Michigan Institute for Clinical and Health Research Postdoctoral Translation Scholars Program (National Center for Advancing Translational Sciences)	81	0	0	2	4	AMER SOC MICROBIOLOGY	WASHINGTON	MSPHERE	SEP-OCT	2021	6	5			e00629-21	10.1128/mSphere.00629-21		20	Microbiology	Science Citation Index Expanded (SCI-EXPANDED)	Microbiology	WO2XU	34585964	Green Published, Green Submitted	2022-05-29	WOS:000712323600015
J	Hsu, CN; Yang, HW; Hou, CY; Chang-Chien, GP; Lin, SF; Tain, YL		Melatonin Prevents Chronic Kidney Disease-Induced Hypertension in Young Rat Treated with Adenine: Implications of Gut Microbiota-Derived Metabolites	ANTIOXIDANTS	English	Article	asymmetric dimethylarginine; hypertension; chronic kidney disease; gut microbiota; melatonin; short-chain fatty acid; nitric oxide; trimethylamine-N-oxide; uremic toxin	Melatonin, a signaling hormone with pleiotropic biofunctions, has shown health benefits. Trimethylamine-N-oxide (TMAO) and asymmetric dimethylarginine (ADMA) are uremic toxins involved in the development of hypertension. TMAO originates from trimethylamine (TMA), a gut microbial product. ADMA is an endogenous nitric oxide (NO) synthase inhibitor. We examined whether melatonin therapy could preven…	Chang Gung Memorial Hospital, Kaohsiung, Taiwan [CMRPG8K1011]	Chang Gung Memorial Hospital, Kaohsiung, Taiwan(Chang Gung Memorial Hospital)	47	0	0	7	10	MDPI	BASEL	ANTIOXIDANTS-BASEL	AUG	2021	10	8			1211	10.3390/antiox10081211		14	Biochemistry & Molecular Biology; Chemistry, Medicinal; Food Science & Technology	Science Citation Index Expanded (SCI-EXPANDED)	Biochemistry & Molecular Biology; Pharmacology & Pharmacy; Food Science & Technology	UF6VX	34439458	Green Published, gold	2022-05-29	WOS:000688710800001
J	Simonova, MP; Laukova, A; Chrastinova, L; Kandricakova, A; Scerbova, J; Strompfova, V; Miltko, R; Belzecki, G		Enterocins as Novel Feed Additives in Rabbit Diet: Enterocin Ent M and Durancin Ent ED26E/7, Their Combination, and Effects on Microbiota, Caecal Fermentation, and Enzymatic Activity	PROBIOTICS AND ANTIMICROBIAL PROTEINS	English	Article	Enterocin; Durancin; Microbiota; Caecal enzymes; Organic acids	The present study investigates the effects of enterocin Ent M and durancin Ent ED26E/7 applied separately and in combination on the intestinal microbiota, caecal enzymatic activity, and fermentaion of rabbits. Eighty rabbits (M91 meatline, aged 5 weeks, both sexes) were divided into groups E (Ent M; 50 mu L/animal/day), D (Ent ED26E/7; 50 mu L/animal/day), E + D (Ent M + Ent ED26E/7), and control…	Slovak Grant Agency VEGA [2/0006/17, 2/0005/21]	Slovak Grant Agency VEGA(Vedecka grantova agentura MSVVaS SR a SAV (VEGA))	41	0	0	1	2	SPRINGER	NEW YORK	PROBIOTICS ANTIMICRO	OCT	2021	13	5	1433	1442		10.1007/s12602-021-09809-0		10	Biotechnology & Applied Microbiology; Microbiology	Science Citation Index Expanded (SCI-EXPANDED)	Biotechnology & Applied Microbiology; Microbiology	UU7FE	34114193		2022-05-29	WOS:000659792300002
J	Mu, JJ; Xu, JW; Wang, LL; Chen, CF; Chen, P		Anti-inflammatory effects of purple sweet potato anthocyanin extract in DSS-induced colitis: modulation of commensal bacteria and attenuated bacterial intestinal infection	FOOD & FUNCTION	English	Article		Purple sweet potato anthocyanins have been acknowledged for their beneficial effects on human inflammatory bowel diseases (IBD). Although the ability of anthocyanins in modulating the gut microbiota has been reported, the relationship between the bacteria modulated by anthocyanins and intestinal inflammation has not been fully elucidated. We aimed to ascertain whether the purple sweet potato anth…	Priority Academic Program Development of Jiangsu Higher Education Institutions (PAPD); Postgraduate Research & Practice Innovation Program of Jiangsu Province [KYCX17_1621]	Priority Academic Program Development of Jiangsu Higher Education Institutions (PAPD); Postgraduate Research & Practice Innovation Program of Jiangsu Province	33	2	2	10	13	ROYAL SOC CHEMISTRY	CAMBRIDGE	FOOD FUNCT	2022-11-15	2021	12	22	11503	11514		10.1039/d1fo02454j		12	Biochemistry & Molecular Biology; Food Science & Technology	Science Citation Index Expanded (SCI-EXPANDED)	Biochemistry & Molecular Biology; Food Science & Technology	WX2XU	34700334		2022-05-29	WOS:000711150300001
J	Changchien, CH; Wang, CH; Chen, HL		Konjac glucomannan polysaccharide and inulin oligosaccharide ameliorate dextran sodium sulfate-induced colitis and alterations in fecal microbiota and short-chain fatty acids in C57BL/6J mice	BIOMEDICINE-TAIWAN	English	Article	Colitis; Dextran sulfate sodium; Konjac glucomannan; Inulin; Microbiota; Mucosal barrier	Background: Konjac glucomannan polysaccharide (KGM), inulin oligosaccharide (inulin) and their mixture has been shown to modulate the gut-associated lymphoid tissue immunity. Aims: The present study was mainly to determine effects of a low-level (2% w/w) KGM and inulin and their combination on dextran sodium sulfate (DSS)-induced colitis. We also determine the potential mechanisms mediating these…	Ministry of Science and Technology (Taiwan) [101-2320-B-040-018MY2, 103-2320-B-468-005]; Ditmanson Medical Foundation Chia-Yi Christian Hospital, Taiwan [CMU105-ASIA-15, CMU106-ASIA-16]	Ministry of Science and Technology (Taiwan)(Ministry of Science and Technology, Taiwan); Ditmanson Medical Foundation Chia-Yi Christian Hospital, Taiwan	41	0	0	1	1	DIGITAL COMMONS BEPRESS	BERKELEY	BIOMEDICINE-TAIWAN		2021	11	3	23	30	4	10.37796/2211-8039.1191		9	Medicine, General & Internal	Emerging Sources Citation Index (ESCI)	General & Internal Medicine	XQ3QU	35223407	gold, Green Published	2022-05-29	WOS:000731463500004
J	Tiwari, A; Hokajarvi, AM; Santo Domingo, J; Elk, M; Jayaprakash, B; Ryu, H; Siponen, S; Vepsalainen, A; Kauppinen, A; Puurunen, O; Artimo, A; Perkola, N; Huttula, T; Miettinen, IT; Pitkanen, T		Bacterial diversity and predicted enzymatic function in a multipurpose surface water system - from wastewater effluent discharges to drinking water production	ENVIRONMENTAL MICROBIOME	English	Article	Bacterial communities; Sewage effluent; Surface water; Seasonal effects; Predicted biological function; 16S rRNA amplicon sequencing	Background Rivers and lakes are used for multiple purposes such as for drinking water (DW) production, recreation, and as recipients of wastewater from various sources. The deterioration of surface water quality with wastewater is well-known, but less is known about the bacterial community dynamics in the affected surface waters. Understanding the bacterial community characteristics -from the sou…	Academy of Finland [263451]; Kaute Foundation [20190366]	Academy of Finland(Academy of Finland); Kaute Foundation	53	5	5	5	10	BMC	LONDON	ENVIRON MICROBIOME	2022-05-22	2021	16	1			11	10.1186/s40793-021-00379-w		17	Genetics & Heredity; Microbiology	Science Citation Index Expanded (SCI-EXPANDED)	Genetics & Heredity; Microbiology	SF8ZL	34022963	gold, Green Published, Green Submitted	2022-05-29	WOS:000653036600001
J	Wong, KR; Sgro, M; Yamakawa, GR; Li, C; McDonald, SJ; Sun, MJ; Shultz, SR; Brady, RD; Mychasiuk, R		Gut microbiome depletion and repetitive mild traumatic brain injury differentially modify bone development in male and female adolescent rats	BONE REPORTS	English	Article	Antibiotics; Concussion; Femur; Musculoskeletal; Sex differences	Dysregulation of the gut microbiome has been shown to disrupt both bone formation and bone resorption in several preclinical and clinical models. However, the role of microbiome in adolescent bone development remains poorly understood. This effect of disrupted bone development may be more pronounced during adolescence, when bone development is vulnerable to environmental stimuli and external insu…	Australian National Health and Medical Research Council	Australian National Health and Medical Research Council(National Health and Medical Research Council (NHMRC) of Australia)	58	0	0	0	3	ELSEVIER	AMSTERDAM	BONE REP	DEC	2021	15				101123	10.1016/j.bonr.2021.101123		11	Endocrinology & Metabolism	Emerging Sources Citation Index (ESCI)	Endocrinology & Metabolism	UY7ZF	34553007	Green Published, gold	2022-05-29	WOS:000701736700015
J	Daniel, S; Phillippi, D; Schneider, LJ; Nguyen, KN; Mirpuri, J; Lund, AK		Exposure to diesel exhaust particles results in altered lung microbial profiles, associated with increased reactive oxygen species/reactive nitrogen species and inflammation, in C57Bl/6 wildtype mice on a high-fat diet	PARTICLE AND FIBRE TOXICOLOGY	English	Article	Diesel particulate matter; Lung microbiome; Inflammation; Probiotics; Reactive oxygen species; Reactive nitrogen species	Background: Exposure to traffic-generated emissions is associated with the development and exacerbation of inflammatory lung disorders such as chronic obstructive pulmonary disorder (COPD) and idiopathic pulmonary fibrosis (IPF). Although many lung diseases show an expansion of Proteobacteria, the role of traffic-generated particulate matter pollutants on the lung microbiota has not been well-cha…	National Institute of Environmental Health Sciences at the National Institute of Health [R15ES026795]; University of North Texas	National Institute of Environmental Health Sciences at the National Institute of Health; University of North Texas	91	7	7	3	44	BMC	LONDON	PART FIBRE TOXICOL	2022-01-08	2021	18	1			3	10.1186/s12989-020-00393-9		25	Toxicology	Science Citation Index Expanded (SCI-EXPANDED)	Toxicology	PQ1FJ	33419468	gold, Green Published	2022-05-29	WOS:000606294400001
J	Blanc, SM; Pender, D; Vinnard, C; Gennaro, ML; Fahrenfeld, NL		Nontuberculous Mycobacteria in the Biofilm Microbiome of Private Well and Premise Plumbing	ENVIRONMENTAL ENGINEERING SCIENCE	English	Article	amplicon sequencing; biofilm; drinking water; household plumbing; opportunistic pathogen; qPCR	Household plumbing biofilms can harbor and transmit bacterial pathogens. Pulmonary infections by nontuberculous mycobacteria (NTM) can occur from this transmission route. NTM infections are increasing around the world and in New Jersey (NJ), where this field study was performed. Plumbing biofilm samples were collected from sinks and showerheads in homes using private wells (n = 19) and in homes o…	NJ Department of Health; USGS NJ Water Resources Research Institute; Rutgers Coastal Climate Risk and Resiliency traineeship - U.S. National Science Foundation [DGE-1633557]	NJ Department of Health; USGS NJ Water Resources Research Institute; Rutgers Coastal Climate Risk and Resiliency traineeship - U.S. National Science Foundation	117	2	2	3	6	MARY ANN LIEBERT, INC	NEW ROCHELLE	ENVIRON ENG SCI	2022-07-01	2021	38	7	607	625		10.1089/ees.2020.0528		19	Engineering, Environmental; Environmental Sciences	Science Citation Index Expanded (SCI-EXPANDED)	Engineering; Environmental Sciences & Ecology	TM5DK			2022-05-29	WOS:000658437300001
J	Guo, MR; Liu, XR; Tan, YW; Kang, FY; Zhu, XH; Fan, XG; Wang, CX; Wang, R; Liu, YL; Qin, XF; Jiang, MS; Wang, XH		Sucralose enhances the susceptibility to dextran sulfate sodium (DSS) induced colitis in mice with changes in gut microbiota	FOOD & FUNCTION	English	Article		Sucralose is one of the most widely used artificial sweeteners, free of nutrients and calories. Its approval and uses correlate with many of the worldwide epidemiological changes in inflammatory bowel disease (IBD). Multiple animal studies by us and others showed that sucralose exacerbated ileitis in SAMP1/YitFc mice and 2,4,6-trinitrobenzene sulfonic acid (TNBS)-induced colitis in rats. In this …	National Natural Science Foundation of China [81703232]; Postdoctoral Scientific Research Developmental Fund of Heilongjiang Province [LBH-Q17117]; College Student Innovation and Entrepreneurship in Heilongjiang Province [201810226020]	National Natural Science Foundation of China(National Natural Science Foundation of China (NSFC)); Postdoctoral Scientific Research Developmental Fund of Heilongjiang Province; College Student Innovation and Entrepreneurship in Heilongjiang Province	58	2	2	9	15	ROYAL SOC CHEMISTRY	CAMBRIDGE	FOOD FUNCT	2022-10-04	2021	12	19	9380	9390		10.1039/d1fo01351c		11	Biochemistry & Molecular Biology; Food Science & Technology	Science Citation Index Expanded (SCI-EXPANDED)	Biochemistry & Molecular Biology; Food Science & Technology	WA9QN	34606537		2022-05-29	WOS:000691365400001
J	Zhou, Y; Chen, S; Gu, WX; Sun, X; Wang, LX; Tang, LM		Sinomenine hydrochloride ameliorates dextran sulfate sodium-induced colitis in mice by modulating the gut microbiota composition whilst suppressing the activation of the NLRP3 inflammasome	EXPERIMENTAL AND THERAPEUTIC MEDICINE	English	Article	Sinomenine hydrochloride; ulcerative colitis; dextran sulfate sodium-induced colitis; gut microbiota composition; NOD-; LRR- and pyrin domain-containing protein 3 inflammasome	Sinomenine is a pure alkaloid that can be isolated from the root of Sinomenium acutum and has been found to exert anti-inflammatory and immunosuppressive effects. The present study investigated the effects of sinomenine hydrochloride (SIN) on inflammation and the gut microbiota composition in the colon of mouse models of dextran sulfate sodium (DSS)-induced colitis. DSS-induced mice colitis was e…	National Natural Science Foundation of China [81803498]; China Postdoctoral Science Foundation [2020M670012ZX]; Jiangsu Natural Science Foundation [BK20181155]; Jiangsu Planned Projects for Postdoctoral Research Funds [2019K157]; Changzhou SciTech Program [CJ20200090]; Young Science & Technology Project of Changzhou Health Commission [QN202032]; Young Talent Development Plan of Changzhou Health C…	National Natural Science Foundation of China(National Natural Science Foundation of China (NSFC)); China Postdoctoral Science Foundation(China Postdoctoral Science Foundation); Jiangsu Natural Science Foundation(Natural Science Foundation of Jiangsu Province); Jiangsu Planned Projects for Postdoctoral Research Funds; Changzhou SciTech Program; Young Science & Technology Project of Changzhou Healt…	54	1	1	2	5	SPANDIDOS PUBL LTD	ATHENS	EXP THER MED	NOV	2021	22	5			1287	10.3892/etm.2021.10722		10	Medicine, Research & Experimental	Science Citation Index Expanded (SCI-EXPANDED)	Research & Experimental Medicine	UW1GU	34630642	Green Published, gold	2022-05-29	WOS:000699914300001
J	Xin, JJ; Yan, SH; Hong, XS; Zhang, H; Zha, JM		Environmentally relevant concentrations of clozapine induced lipotoxicity and gut microbiota dysbiosis in Chinese rare minnow (Gobiocypris rarus)	ENVIRONMENTAL POLLUTION	English	Article	Clozapine; Lipotoxicity; Gut microbiota dysbiosis; Chinese rare minnow	Clozapine (CLZ) is a neuroactive pharmaceutical that is frequently detected in aquatic environments. Although the cardiotoxicity, developmental toxicity, and neurotoxicity of CLZ in aquatic non-target organisms have been reported, its lipotoxicity and underlying mechanism are unknown. Therefore, in this study, 2-month-old Chinese rare minnows were exposed to 0, 0.1, 1, and 10 mu g/L CLZ for 90 da…	National Key Research and Development Project of China [2019YFC1803402]; National Natural Science Foundation of China [41907221]	National Key Research and Development Project of China; National Natural Science Foundation of China(National Natural Science Foundation of China (NSFC))	57	1	1	12	25	ELSEVIER SCI LTD	OXFORD	ENVIRON POLLUT	2022-10-01	2021	286				117298	10.1016/j.envpol.2021.117298		10	Environmental Sciences	Science Citation Index Expanded (SCI-EXPANDED)	Environmental Sciences & Ecology	UD8SQ	33964688		2022-05-29	WOS:000687473100004
J	Hsu, CN; Hou, CY; Chang-Chien, GP; Lin, SF; Chan, JYH; Lee, CT; Tain, YL		Maternal resveratrol therapy protected adult rat offspring against hypertension programmed by combined exposures to asymmetric dimethylarginine and trimethylamine-N-oxide	JOURNAL OF NUTRITIONAL BIOCHEMISTRY	English	Article	Asymmetric dimethylarginine; Developmental origins of health and disease (DOHaD); Gut microbiota; Hypertension; Nitric oxide; Resveratrol; Trimethylamine-N-oxide	Resveratrol, a phytochemical, has shown antioxidant properties and potential benefits in hypertension. Asymmetric dimethylarginine (ADMA)-related nitric oxide deficiency and gut microbiota-derived metabolite trimethylamine-N-oxide (TMAO) have been linked to hypertension. We aimed to test whether maternal resveratrol therapy would protect adult offspring against hypertension programmed by prenatal…	Ministry of Science and Technology, Taiwan [MOST 107-2314-B-182-045-MY3]	Ministry of Science and Technology, Taiwan(Ministry of Science and Technology, Taiwan)	47	8	8	3	9	ELSEVIER SCIENCE INC	NEW YORK	J NUTR BIOCHEM	JUL	2021	93				108630	10.1016/j.jnutbio.2021.108630		10	Biochemistry & Molecular Biology; Nutrition & Dietetics	Science Citation Index Expanded (SCI-EXPANDED)	Biochemistry & Molecular Biology; Nutrition & Dietetics	SF4PA	33798707		2022-05-29	WOS:000652738600010
J	Hill, EM; Howard, CD; Bale, TL; Jasarevic, E		Perinatal exposure to tetracycline contributes to lasting developmental effects on offspring	ANIMAL MICROBIOME	English	Article	Microbial assembly; Behavior; Tetracycline inducible expression; Tet-On; Off System; Development	Background For more than 30 years, the tetracycline on/off system of inducible gene expression has been leveraged to study disease mechanisms across many research areas, especially that of metabolism and neuroscience. This system requires acute or chronic exposure to tetracycline derivatives, such as doxycycline, to manipulate gene expression in a temporal and tissue-specific manner, with exposur…	National Institutes of Health [MH 104184, MH 091258, MH 087597, MH 073030, MH 108286, ES 028202]; NRSA [F32 MH 109298]; NIDDK [K01 121734]	National Institutes of Health(United States Department of Health & Human ServicesNational Institutes of Health (NIH) - USA); NRSA(United States Department of Health & Human ServicesNational Institutes of Health (NIH) - USA); NIDDK(United States Department of Health & Human ServicesNational Institutes of Health (NIH) - USANIH National Institute of Diabetes & Digestive & Kidney Diseases (NIDDK))	45	0	0	2	4	BMC	LONDON	ANIM MICROBIOME	2022-05-11	2021	3	1			37	10.1186/s42523-021-00099-z		11	Microbiology; Veterinary Sciences	Emerging Sources Citation Index (ESCI)	Microbiology; Veterinary Sciences	WD0XU	33975649	gold, Green Published	2022-05-29	WOS:000704674800001
J	Schellekens, H; Torres-Fuentes, C; van de Wouw, M; Long-Smith, CM; Mitchell, A; Strain, C; Berding, K; Bastiaanssen, TFS; Rea, K; Golubeva, AV; Arboleya, S; Verpaalen, M; Pusceddu, MM; Murphy, A; Fouhy, F; Murphy, K; Ross, P; Roy, BL; Stanton, C; Dinan, TG; Cryan, JF		Bifidobacterium longum counters the effects of obesity: Partial successful translation from rodent to human	EBIOMEDICINE	English	Article	Obesity; Translational; Fasting blood glucose; Ghrelin; Cortisol; Gut microbiota; Probiotic; Bifidobacterium longum	Background: The human gut microbiota has emerged as a key factor in the development of obesity. Certain probiotic strains have shown anti-obesity effects. The objective of this study was to investigate whether Bifidobacterium longum APC1472 has anti-obesity effects in high-fat diet (HFD)-induced obese mice and whether B. longum APC1472 supplementation reduces body-mass index (BMI) in healthy over…			99	11	11	10	11	ELSEVIER	AMSTERDAM	EBIOMEDICINE	JAN	2021	63				103176	10.1016/j.ebiom.2020.103176		16	Medicine, General & Internal; Medicine, Research & Experimental	Science Citation Index Expanded (SCI-EXPANDED)	General & Internal Medicine; Research & Experimental Medicine	YK6AF	33349590	gold, Green Published	2022-05-29	WOS:000745292400010
J	Liu, L; Yang, M; Dong, WX; Liu, TY; Song, XL; Gu, Y; Wang, SN; Liu, Y; Abla, Z; Qiao, XM; Liu, WT; Jiang, K; Wang, BM; Zhang, J; Cao, HL		Gut Dysbiosis and Abnormal Bile Acid Metabolism in Colitis-Associated Cancer	GASTROENTEROLOGY RESEARCH AND PRACTICE	English	Article		Background. Patients with prolonged inflammatory bowel disease (IBD) can develop into colorectal cancer (CRC), also called colitis-associated cancer (CAC). Studies have shown the association between gut dysbiosis, abnormal bile acid metabolism, and inflammation process. Here, we aimed to investigate these two factors in the CAC model. Methods. C57BL/6 mice were randomly allocated to two groups: a…	National Natural Science Foundation of China [81970477]; Natural Science Foundation of Tianjin [17ZXMFSY00210, 17JCYBJC24900]; China Postdoctoral Science Foundation [2019M651049]; Fundamental Research Funds for the Central Universities [3332020079]	National Natural Science Foundation of China(National Natural Science Foundation of China (NSFC)); Natural Science Foundation of Tianjin(Natural Science Foundation of Tianjin); China Postdoctoral Science Foundation(China Postdoctoral Science Foundation); Fundamental Research Funds for the Central Universities(Fundamental Research Funds for the Central Universities)	54	3	3	7	11	HINDAWI LTD	LONDON	GASTROENT RES PRACT	2022-02-24	2021	2021				6645970	10.1155/2021/6645970		12	Gastroenterology & Hepatology	Science Citation Index Expanded (SCI-EXPANDED)	Gastroenterology & Hepatology	QU2UN	33708251	Green Published, gold	2022-05-29	WOS:000627139000001
J	Hankel, J; Bodmann, B; Todte, M; Galvez, E; Strowig, T; Radko, D; Antakli, A; Visscher, C		Comparison of Chicken Cecal Microbiota after Metaphylactic Treatment or Following Administration of Feed Additives in a Broiler Farm with Enterococcal Spondylitis History	PATHOGENS	English	Article	16S rRNA gene; beta diversity; bacterial pathogens; poultry	Minimizing the clinical signs of Enterococcus cecorum infections causing enterococcal spondylitis in broiler herds is successful when initiated as metaphylaxis in the first week of life. Mechanistically, either the Enterococcus species present at that time are reduced by antibiotic treatment or antibiotic treatment might induce changes in intestinal microbiota composition with an indirect and sub…	Deutsche Forschungsgemeinschaft; University of Veterinary Medicine Hannover	Deutsche Forschungsgemeinschaft(German Research Foundation (DFG)); University of Veterinary Medicine Hannover	62	1	1	1	2	MDPI	BASEL	PATHOGENS	AUG	2021	10	8			1068	10.3390/pathogens10081068		14	Microbiology	Science Citation Index Expanded (SCI-EXPANDED)	Microbiology	UH9RQ	34451532	Green Published, gold	2022-05-29	WOS:000690258600001
J	Hu, DN; Giesy, JP; Guo, M; Ung, WK; Kong, YJ; Mok, KM; Lee, SMY		Temporal Patterns of Bacterial and Viral Communities during Algae Blooms of a Reservoir in Macau	TOXINS	English	Article	phytoplankton; cyanobacteria; algal viruses; viral metagenomics; Asia; hazardous algal bloom	Compositions of microbial communities associated with blooms of algae in a storage reservoir in Macau, China were investigated between 2013 and 2016. Algae were enumerated by visible light microscopy. Profiles of organisms in water were examined by 16S rRNA sequences and viral metagenomics, based on next generation sequencing. Results of 16S rRNA sequencing indicated that majority of the identifi…			50	1	1	5	5	MDPI	BASEL	TOXINS	DEC	2021	13	12			894	10.3390/toxins13120894		13	Food Science & Technology; Toxicology	Science Citation Index Expanded (SCI-EXPANDED)	Food Science & Technology; Toxicology	XZ2AK	34941731	Green Published, gold	2022-05-29	WOS:000737460700001
J	Lewis, A; McKeon, TP; De Roos, AJ; Ravel, J; Elovitz, MA; Burris, HH		Associations of public water system trihalomethane exposure during pregnancy with spontaneous preterm birth and the cervicovaginal microbial-immune state	ENVIRONMENTAL RESEARCH	English	Article	Trihalomethane(s); Total trihalomethane(s); Beta-defensin; Preterm birth; Microbiome	Background: Water total trihalomethanes (TTHMs) are disinfectant byproducts found in municipal water supplies. TTHM exposure has been linked to cancer and may be associated with adverse reproductive outcomes. A non-optimal cervicovaginal microbiota and low cervicovaginal beta-defensin-2 levels are associated with increased risk of spontaneous preterm birth. Whether TTHM exposure increases the ris…			51	0	0	1	11	ACADEMIC PRESS INC ELSEVIER SCIENCE	SAN DIEGO	ENVIRON RES	AUG	2021	199				111288	10.1016/j.envres.2021.111288		7	Environmental Sciences; Public, Environmental & Occupational Health	Science Citation Index Expanded (SCI-EXPANDED); Social Science Citation Index (SSCI)	Environmental Sciences & Ecology; Public, Environmental & Occupational Health	SV3LQ	33965388		2022-05-29	WOS:000663724400001
J	Wang, DL; Lin, H; Ma, Q; Bai, YH; Qu, JH		Manganese oxides in Phragmites rhizosphere accelerates ammonia oxidation in constructed wetlands	WATER RESEARCH	English	Article	Constructed wetlands; Phragmites rhizosphere microbiome; metagenomics; Mn oxides; Ammonia oxidation	Phragmites reeds are widely used in constructed wetlands (CWs) for treating wastewater. The enrichment of microorganisms and Fe/Mn plaque in Phragmites rhizospheres largely contributes to pollutant removal. However, their interactions and potential synergistic roles in water purification are poorly understood. To address the issue, we first compared the microbial community traits in the Phragmite…	National Natural Science Foundation of China [51778603]	National Natural Science Foundation of China(National Natural Science Foundation of China (NSFC))	66	3	3	89	136	PERGAMON-ELSEVIER SCIENCE LTD	OXFORD	WATER RES	2022-10-15	2021	205				117688	10.1016/j.watres.2021.117688		10	Engineering, Environmental; Environmental Sciences; Water Resources	Science Citation Index Expanded (SCI-EXPANDED)	Engineering; Environmental Sciences & Ecology; Water Resources	WD8KS	34597990		2022-05-29	WOS:000705184300006
J	Krauze, M; Cendrowska-Pinkosz, M; Matusevicius, P; Stepniowska, A; Jurczak, P; Ognik, K		The Effect of Administration of a Phytobiotic Containing Cinnamon Oil and Citric Acid on the Metabolism, Immunity, and Growth Performance of Broiler Chickens	ANIMALS	English	Review	phytobiotic; cinnamon oil; nutritional supplement; blood parameters; microbiological parameters	Simple Summary In poultry farming, additives are sought after to ensure the living needs of birds, improve the health of birds, and improve growth performance. Noticeably, more and more hopes for obtaining such effects are being placed in plant additives, called phytobiotics, which are safe as natural additives, both for the health of birds and for not leaving toxic residues in final products (me…			61	5	8	5	10	MDPI	BASEL	ANIMALS-BASEL	FEB	2021	11	2			399	10.3390/ani11020399		17	Agriculture, Dairy & Animal Science; Veterinary Sciences; Zoology	Science Citation Index Expanded (SCI-EXPANDED)	Agriculture; Veterinary Sciences; Zoology	QM8MT	33557433	Green Published	2022-05-29	WOS:000622028000001
J	Santos, AA; Guedes, DO; Barros, MUG; Oliveira, S; Pacheco, ABF; Azevedo, SMFO; Magalhaes, VF; Pestana, CJ; Edwards, C; Lawton, LA; Capelo-Neto, J		Effect of hydrogen peroxide on natural phytoplankton and bacterioplankton in a drinking water reservoir: Mesocosm-scale study	WATER RESEARCH	English	Article	Water quality; Cyanobacteria; Advanced Oxidative Process; Remediation; Metagenomics; Exiguobacterium	Cyanobacterial blooms are increasingly reported worldwide, presenting a challenge to water treatment plants and concerning risks to human health and aquatic ecosystems. Advanced oxidative processes comprise efficient and safe methods for water treatment. Hydrogen peroxide (H2O2) has been proposed as a sustainable solution to mitigate bloom-forming cyanobacteria since this group presents a higher …	Engineering and Physical Sciences Research Council (EPSRC) [EP/P029280/1]; Coordination for the Improvement of Higher Education Personnel -CAPES [PROEX 20/2016, Print 88887.311806/2018-00]; Brazilian National Research Council -CNPq [403116/2016-3, 304164/2017-8]; Ceara Research Support Foundation FUNCAP [PNE-0112-00042.01.00/16]; Brazilian National Research Council -CNPq	Engineering and Physical Sciences Research Council (EPSRC)(UK Research & Innovation (UKRI)Engineering & Physical Sciences Research Council (EPSRC)); Coordination for the Improvement of Higher Education Personnel -CAPES(Coordenacao de Aperfeicoamento de Pessoal de Nivel Superior (CAPES)); Brazilian National Research Council -CNPq(Conselho Nacional de Desenvolvimento Cientifico e Tecnologico (CNPQ)…	67	5	5	17	36	PERGAMON-ELSEVIER SCIENCE LTD	OXFORD	WATER RES	2022-06-01	2021	197				117069	10.1016/j.watres.2021.117069		12	Engineering, Environmental; Environmental Sciences; Water Resources	Science Citation Index Expanded (SCI-EXPANDED)	Engineering; Environmental Sciences & Ecology; Water Resources	RT3JX	33784604	hybrid, Green Published	2022-05-29	WOS:000644359600016
J	Liu, Y; Jin, X; Ma, YC; Jiang, ZY; Wei, ZT; Xiang, LY; Sun, Q; Qi, SA; Wang, KJ; Li, H		Short-Chain Fatty Acids Reduced Renal Calcium Oxalate Stones by Regulating the Expression of Intestinal Oxalate Transporter SLC26A6	MSYSTEMS	English	Article	renal calcium oxalate stones; short-chain fatty acids; intestinal oxalate transporters; gut microbiota; oxalate	Renal calcium oxalate (CaOx) stone is a common urologic disease with a high prevalence and recurrence rate. However, short-chain fatty acids (SCFAs) are less often reported in the prevention of urolithiasis. This study aimed to explore the effect of SCFAs on the renal CaOx stone formation and the underlying mechanisms. Ethylene glycol was used to induce renal CaOx crystals in rats. SCFAs (acetate…	National Natural Science Foundation of China [81770703, 81970602]; Foundation of Science & Technology Department of Sichuan Province [2018SZ0118]; 1.3.5 Project for Disciplines of Excellence, West China Hospital, Sichuan University [ZYJC18015]; Post-Doctor Research Project, West China Hospital, Sichuan University [2019HXBH087]	National Natural Science Foundation of China(National Natural Science Foundation of China (NSFC)); Foundation of Science & Technology Department of Sichuan Province; 1.3.5 Project for Disciplines of Excellence, West China Hospital, Sichuan University; Post-Doctor Research Project, West China Hospital, Sichuan University	54	0	0	5	5	AMER SOC MICROBIOLOGY	WASHINGTON	MSYSTEMS	NOV-DEC	2021	6	6			e01045-21	10.1128/mSystems.01045-21		17	Microbiology	Science Citation Index Expanded (SCI-EXPANDED)	Microbiology	XV0CG	34783577	gold, Green Published	2022-05-29	WOS:000734620700003
J	Gallotti, B; Galvao, I; Leles, G; Quintanilha, MF; Souza, RO; Miranda, VC; Rocha, VM; Trindade, LM; Jesus, LCL; Mendes, V; Andre, LC; D'Auriol-Souza, MM; Azevedo, V; Cardoso, VN; Martins, FS; Vieira, AT		Effects of dietary fibre intake in chemotherapy-induced mucositis in murine model	BRITISH JOURNAL OF NUTRITION	English	Article	Mucositis; Fibre; Pectin; SCFA; Microbiota modulation	Mucositis is an inflammation of the gastrointestinal mucosa resulting from high doses of radio/chemotherapy treatment and may lead to interruption of antineoplasic therapy. Soluble fibres, like pectin, increase SCFA production, which play a role in gut homoeostasis and inflammation suppression. Due to the properties of pectin, the aim of the present study was to evaluate the effect of a high-fibr…	Brazilian National Council for Scientific and Technological Development (CNPq); Coordenacao de Aperfeicoamento de Pessoal de Nivel Superior (CAPES); Foundation for Research Support of the State of Minas Gerais [FAPEMIG -APQ-00593-14, FAPEMIG -APQ-03328-18]; Loreal-UNESCO-ABC, Brasil	Brazilian National Council for Scientific and Technological Development (CNPq)(Conselho Nacional de Desenvolvimento Cientifico e Tecnologico (CNPQ)); Coordenacao de Aperfeicoamento de Pessoal de Nivel Superior (CAPES)(Coordenacao de Aperfeicoamento de Pessoal de Nivel Superior (CAPES)); Foundation for Research Support of the State of Minas Gerais; Loreal-UNESCO-ABC, Brasil(L'Oreal Group)	64	4	4	4	10	CAMBRIDGE UNIV PRESS	CAMBRIDGE	BRIT J NUTR	2022-09-28	2021	126	6	853	864	PII S0007114520004924	10.1017/S0007114520004924		12	Nutrition & Dietetics	Science Citation Index Expanded (SCI-EXPANDED)	Nutrition & Dietetics	TX3ZT	33298215		2022-05-29	WOS:000683029100008
J	McDaniel, EA; Wahl, SA; Ishii, SI; Pinto, A; Ziels, R; Nielsen, PH; McMahon, KD; Williams, RBH		Prospects for multi-omics in the microbial ecology of water engineering	WATER RESEARCH	English	Review	Microbial ecology; Metagenomics; Metatranscriptomics; Metaproteomics; Metabolomics; Metabolic modeling; Water engineering	Advances in high-throughput sequencing technologies and bioinformatics approaches over almost the last three decades have substantially increased our ability to explore microorganisms and their functions - including those that have yet to be cultivated in pure isolation. Genome-resolved metagenomic approaches have enabled linking powerful functional predictions to specific taxonomical groups with…	Japanese Society of Water Environment (JSWE)	Japanese Society of Water Environment (JSWE)	292	0	0	66	101	PERGAMON-ELSEVIER SCIENCE LTD	OXFORD	WATER RES	2022-10-15	2021	205				117608	10.1016/j.watres.2021.117608		17	Engineering, Environmental; Environmental Sciences; Water Resources	Science Citation Index Expanded (SCI-EXPANDED)	Engineering; Environmental Sciences & Ecology; Water Resources	US5US	34555741	Green Submitted	2022-05-29	WOS:000697494600004
J	Xu, HM; Huang, HL; Liu, YD; Zhu, JQ; Zhou, YL; Chen, HT; Xu, J; Zhao, HL; Guo, X; Shi, W; Nie, YQ; Zhou, YJ		Selection strategy of dextran sulfate sodium-induced acute or chronic colitis mouse models based on gut microbial profile	BMC MICROBIOLOGY	English	Article	Dextran sulfate sodium; Acute colitis; Chronic colitis; Gut microbiota	Background Dextran sulfate sodium (DSS) replicates ulcerative colitis (UC)-like colitis in murine models. However, the microbial characteristics of DSS-triggered colitis require further clarification. To analyze the changes in gut microbiota associated with DSS-induced acute and chronic colitis. Methods Acute colitis was induced in mice by administering 3% DSS for 1 week in the drinking water, an…	National Natural Science Foundation of China [81700487, 81970507]; Guangdong Medical Science and Technology Research Fund [A2016340]; Guangdong Planned Project of Science and Technology [2016A020215206]; Guangzhou Planned Project of Science and Technology [201904010132, 202002020012, 202002030288, 202002030293]; Innovative Clinical Technique of Guangzhou [2019GX05]	National Natural Science Foundation of China(National Natural Science Foundation of China (NSFC)); Guangdong Medical Science and Technology Research Fund; Guangdong Planned Project of Science and Technology; Guangzhou Planned Project of Science and Technology; Innovative Clinical Technique of Guangzhou	50	4	4	15	18	BMC	LONDON	BMC MICROBIOL	2022-10-16	2021	21	1			279	10.1186/s12866-021-02342-8		14	Microbiology	Science Citation Index Expanded (SCI-EXPANDED)	Microbiology	WH9EV	34654370	Green Published, gold	2022-05-29	WOS:000707972800001
J	Jiang, S; Shui, YJ; Cui, Y; Tang, C; Wang, XH; Qiu, XY; Hu, WP; Fei, LY; Li, Y; Zhang, SP; Zhao, L; Xu, N; Dong, F; Ren, XQ; Liu, RS; Persson, PB; Patzak, A; Lai, EY; Wei, QC; Zheng, ZH		Gut microbiota dependent trimethylamine N-oxide aggravates angiotensin II-induced hypertension	REDOX BIOLOGY	English	Article	Trimethylamine N-oxide; Angiotensin II; Blood pressure; Afferent arteriole; Calcium	Gut microbiota produce Trimethylamine N-oxide (TMAO) by metabolizing dietary phosphatidylcholine, choline, L-carnitine and betaine. TMAO is implicated in the pathogenesis of chronic kidney disease (CKD), diabetes, obesity and atherosclerosis. We test, whether TMAO augments angiotensin II (Ang II)-induced vasoconstriction and hence promotes Ang II-induced hypertension. Plasma TMAO levels were inde…	National Nature Science Foundation of China [81572952]; Deutsche Forschungsgemeinschaft [394046635-SFB 1365]; German Research Foundation [394046635-SFB 1365]; Shenzhen Science and technology Innovation Committee [33, 327]; medical scientific research foundation of Guangdong province [A2018071]; Guangdong basic and applied basic research foundation [2019A1515110488]	National Nature Science Foundation of China(National Natural Science Foundation of China (NSFC)); Deutsche Forschungsgemeinschaft(German Research Foundation (DFG)); German Research Foundation(German Research Foundation (DFG)); Shenzhen Science and technology Innovation Committee; medical scientific research foundation of Guangdong province; Guangdong basic and applied basic research foundation	71	7	7	20	23	ELSEVIER	AMSTERDAM	REDOX BIOL	OCT	2021	46				102115	10.1016/j.redox.2021.102115		13	Biochemistry & Molecular Biology	Science Citation Index Expanded (SCI-EXPANDED)	Biochemistry & Molecular Biology	WA4IC	34474396	Green Published, gold	2022-05-29	WOS:000702849400002
J	Lu, HQ; You, YT; Zhou, XH; He, QX; Wang, M; Chen, LQ; Zhou, L; Sun, XM; Liu, YY; Jiang, PP; Dai, JJ; Fu, XQ; Kwan, HY; Zhao, XS; Lou, LJ		Citrus reticulatae pericarpium Extract Decreases the Susceptibility to HFD-Induced Glycolipid Metabolism Disorder in Mice Exposed to Azithromycin in Early Life	FRONTIERS IN IMMUNOLOGY	English	Article	Citrus reticulata pericarpium extract; early life; antibiotic exposure; glycolipid metabolism disorder; TMAO	BackgroundStudies have shown that gut microbe disorder in mice due to early-life antibiotic exposure promotes glycolipid metabolism disorder in adulthood. However, the underlying mechanism remains unclear and there is not yet an effective intervention or treatment for this process. PurposeThe study investigated whether early-life azithromycin (AZT) exposure in mice could promote high-fat diet (HF…	National Key R&D Program of China [2020YFC2003100]; Key Project of National Natural Science Foundation of China; National Science Foundation of China; Natural Science Foundation of Guangdong Province, China [2018A030313320, 2018A030313375]; Science & Technical Plan of Guangzhou, Guangdong, China; Innovation Team and Talents Cultivation Program of National Administration of Traditional Chinese Med…	National Key R&D Program of China; Key Project of National Natural Science Foundation of China(National Natural Science Foundation of China (NSFC)); National Science Foundation of China(National Natural Science Foundation of China (NSFC)); Natural Science Foundation of Guangdong Province, China(National Natural Science Foundation of Guangdong Province); Science & Technical Plan of Guangzhou, Guan…	44	0	0	11	11	FRONTIERS MEDIA SA	LAUSANNE	FRONT IMMUNOL	2022-11-19	2021	12				774433	10.3389/fimmu.2021.774433		15	Immunology	Science Citation Index Expanded (SCI-EXPANDED)	Immunology	XK7FU	34868039	gold, Green Published	2022-05-29	WOS:000727627500001
J	Carraturo, F; Del Giudice, C; Compagnone, M; Libralato, G; Toscanesi, M; Trifuoggi, M; Galdiero, E; Guida, M		Evaluation of Microbial Communities of Bottled Mineral Waters and Preliminary Traceability Analysis Using NGS Microbial Fingerprints	WATER	English	Article	mineral water; shelf life; NGS; microbiota; fingerprints; traceability	The microbiological monitoring of mineral bottled waters results is crucial for the prevention of outbreaks in consumers. European and International regulations establish the quality of water intended for human consumption in order to preserve human health from the negative effects deriving from water contamination. Advanced methods targeting the faster detection of potential pathogens in drinkin…			50	1	1	4	4	MDPI	BASEL	WATER-SUI	OCT	2021	13	20			2824	10.3390/w13202824		18	Environmental Sciences; Water Resources	Science Citation Index Expanded (SCI-EXPANDED)	Environmental Sciences & Ecology; Water Resources	WQ6XO		gold, Green Published	2022-05-29	WOS:000713957500001
J	Li, SJ; Zhuge, AX; Wang, KC; Lv, LX; Bian, XY; Yang, LY; Xia, JF; Jiang, XW; Wu, WR; Wang, ST; Wang, QQ; Li, LJ		Ketogenic diet aggravates colitis, impairs intestinal barrier and alters gut microbiota and metabolism in DSS-induced mice	FOOD & FUNCTION	English	Article		Inflammatory bowel disease (IBD) is an idiopathic inflammatory disease with a high incidence. Multiple factors including dietary composition contribute to its occurrence. Recently, ketogenic diet which consists of a high proportion of fat and low carbohydrates has gained great popularity. Our study is aimed to explore the effect of ketogenic diet on IBD and its potential mechanisms. C57BL/6 mice …	National Key Research and Development Program of China [2018YFC2000500]; National Natural Science Foundation of China [81790613, 81570512]	National Key Research and Development Program of China; National Natural Science Foundation of China(National Natural Science Foundation of China (NSFC))	53	1	1	14	24	ROYAL SOC CHEMISTRY	CAMBRIDGE	FOOD FUNCT	2022-10-19	2021	12	20	10210	10225		10.1039/d1fo02288a		16	Biochemistry & Molecular Biology; Food Science & Technology	Science Citation Index Expanded (SCI-EXPANDED)	Biochemistry & Molecular Biology; Food Science & Technology	WI7XR	34542110		2022-05-29	WOS:000697249200001
J	Liu, YL; Xie, CY; Zhai, ZY; Deng, ZY; De Jonge, HOR; Wu, X; Ruan, Z		Uridine attenuates obesity, ameliorates hepatic lipid accumulation and modifies the gut microbiota composition in mice fed with a high-fat diet	FOOD & FUNCTION	English	Article		Uridine (UR) is a pyrimidine nucleoside that plays an important role in regulating glucose and lipid metabolism. The aim of this study was to investigate the effect of UR on obesity, fat accumulation in liver, and gut microbiota composition in high-fat diet (HFD)-fed mice. ICR mice were, respectively, divided into 3 groups for 8 weeks, that is, control (CON, n = 12), high fat diet (HFD, n = 16), …	National Key R&D Program of China [2016YFD0501201]; Science and Technology Projects of Hunan Province [2019RS3020]; Jiangxi Provincial Innovation and Entrepreneurship projects	National Key R&D Program of China; Science and Technology Projects of Hunan Province; Jiangxi Provincial Innovation and Entrepreneurship projects	73	7	7	8	30	ROYAL SOC CHEMISTRY	CAMBRIDGE	FOOD FUNCT	2022-02-21	2021	12	4	1829	1840		10.1039/d0fo02533j		12	Biochemistry & Molecular Biology; Food Science & Technology	Science Citation Index Expanded (SCI-EXPANDED)	Biochemistry & Molecular Biology; Food Science & Technology	QP6PH	33527946		2022-05-29	WOS:000623956200035
J	Garner, E; Davis, BC; Milligan, E; Blair, MF; Keenum, I; Maile-Moskowitz, A; Pan, J; Gnegy, M; Liguori, K; Gupta, S; Prussin, AJ; Marr, LC; Heath, LS; Vikesland, PJ; Zhang, LQ; Pruden, A		Next generation sequencing approaches to evaluate water and wastewater quality	WATER RESEARCH	English	Review	Next generation sequencing; Drinking water; Wastewater; Water reuse; Metagenomics; Metatranscriptomics	The emergence of next generation sequencing (NGS) is revolutionizing the potential to address complex microbiological challenges in the water industry. NGS technologies can provide holistic insight into micro-bial communities and their functional capacities in water and wastewater systems, thus eliminating the need to develop a new assay for each target organism or gene. However, several barriers…	Water Research Foundation (WRF) [4961]; U.S. National Science Foundation Partnerships in Research and Education [1545756]; U.S. Department of Agriculture National Institute of Food and Agriculture [2017-6 8003-264 98]	Water Research Foundation (WRF); U.S. National Science Foundation Partnerships in Research and Education; U.S. Department of Agriculture National Institute of Food and Agriculture(United States Department of Agriculture (USDA))	392	11	11	18	56	PERGAMON-ELSEVIER SCIENCE LTD	OXFORD	WATER RES	2022-04-15	2021	194				116907	10.1016/j.watres.2021.116907		24	Engineering, Environmental; Environmental Sciences; Water Resources	Science Citation Index Expanded (SCI-EXPANDED)	Engineering; Environmental Sciences & Ecology; Water Resources	YL1AZ	33610927	Bronze	2022-05-29	WOS:000745633400001
J	Bishehkolaei, R; Rezaeipour, V; Abdullahpour, R; Jarrahi, M; Ghasemi, H; Daryaei, S; Mirani, S		Milk Kefir as a Natural Probiotic, Individually or in Combination with Organic Acids in Broiler Chickens: Influence on the Immune-Related Gene Expression, Intestinal Morphology, Microbiota Activity, and Serum Biochemistry	POULTRY SCIENCE JOURNAL	English	Article	Kefir; Broiler; Performance; Gene expression	The objective of this study was to examine the influence of the addition of milk kefir (MK), as a natural probiotic to drinking water, individually or in combination with organic acids (OA), on the growth performance, intestinal microbial counts and morphology, serum metabolites and immune status in broiler chickens. Two hundred and fifty one-day-old broiler chicks (Ross 308) were randomly distri…			31	0	0	4	8	GORGAN UNIV AGRICULTURAL SCIENCES & NATURAL RESOURCES	GORGAN	POULTRY SCI J	WIN-SPR	2021	9	1	97	105		10.22069/psj.2021.18783.1665		9	Agriculture, Dairy & Animal Science	Emerging Sources Citation Index (ESCI)	Agriculture	ST1XF			2022-05-29	WOS:000662243400010
J	Zhang, XN; Shi, L; Chen, R; Zhao, Y; Ren, DY; Yang, XB		Chlorogenic acid inhibits trimethylamine-N-oxide formation and remodels intestinal microbiota to alleviate liver dysfunction in high l-carnitine feeding mice	FOOD & FUNCTION	English	Article		High l-carnitine ingestion has been shown to cause liver injury, mechanically due to an elevated circulating level of trimethylamine-N-oxide (TMAO), a gut microbiota-derived metabolite from l-carnitine. This study aimed to investigate whether chlorogenic acid (CGA), a health-promoting polyphenol, could inhibit TMAO formation and thereafter might prevent l-carnitine-induced liver injury in mice. F…	National Natural Science Foundation of China [31871752, 31901647, 32072175]; Key Research and Development Plan in Shaanxi Province [2020ZDLSF01-07]; Fundamental Research Funds for the Central Universities of Shaanxi Normal University [GK201803074, GK2020-1601021041, 2019TS085, TD2020043Y]; Development Program for Innovative Research Team of Shaanxi Normal University [GK202101006]; Sci-Tech Innova…	National Natural Science Foundation of China(National Natural Science Foundation of China (NSFC)); Key Research and Development Plan in Shaanxi Province; Fundamental Research Funds for the Central Universities of Shaanxi Normal University; Development Program for Innovative Research Team of Shaanxi Normal University; Sci-Tech Innovation Team of Shaanxi Province, China; China Postdoctoral Science …	41	2	2	14	23	ROYAL SOC CHEMISTRY	CAMBRIDGE	FOOD FUNCT	2022-11-01	2021	12	21	10500	10511		10.1039/d1fo01778k		12	Biochemistry & Molecular Biology; Food Science & Technology	Science Citation Index Expanded (SCI-EXPANDED)	Biochemistry & Molecular Biology; Food Science & Technology	WP8MT	34558577		2022-05-29	WOS:000698752700001
J	Rustia, AJ; Paterson, JS; Best, G; Sokoya, EM		Microbial disruption in the gut promotes cerebral endothelial dysfunction	PHYSIOLOGICAL REPORTS	English	Article	antibiotics; cerebral; endothelium; microbiota; nitric oxide	Cerebrovascular disease is a group of conditions characterized by disorders of the cerebral vessels. Endothelial dysfunction renders the vasculature at risk of impaired blood flow and increases the potential of developing cerebrovascular disease. The gut microbiota has been recently identified as a possible risk factor of cerebrovascular disease. However, a direct link between gut microbiota and …			55	0	0	1	1	WILEY	HOBOKEN	PHYSIOL REP	NOV	2021	9	21			e15100	10.14814/phy2.15100		14	Physiology	Emerging Sources Citation Index (ESCI)	Physiology	WX1KD	34755466	gold, Green Published	2022-05-29	WOS:000718361800007
J	Liu, F; Wang, XJ; Li, DM; Cui, Y; Li, XL		Apple polyphenols extract alleviated dextran sulfate sodium-induced ulcerative colitis in C57BL/6 male mice by restoring bile acid metabolism disorder and gut microbiota dysbiosis	PHYTOTHERAPY RESEARCH	English	Article	apple polyphenols extract; bile acid metabolism; gut microbiota; phloretin; ulcerative colitis	To investigate and compare the preventive effects of apple polyphenols extract (APE) with phloretin on dextran sulfate sodium (DSS)-induced ulcerative colitis (UC), 60 male mice were treated with 125 or 500 mg/(kg bw d) APE or 100 mg/(kg bw d) phloretin, the single-ingredient of APE, for continuous 3 weeks by intragastric administration, meanwhile, mice were provided with 3% DSS dissolved in drin…	National Natural Science Foundation of China [81973023, 81673150, 81372980]; National Key R&D Program of China [2017YFC1310700, 2017YFC1310701]; Grant of Social Development of Suzhou [SYS201671]; Priority Academic Program Development of Jiangsu Higher Education Institutions	National Natural Science Foundation of China(National Natural Science Foundation of China (NSFC)); National Key R&D Program of China; Grant of Social Development of Suzhou; Priority Academic Program Development of Jiangsu Higher Education Institutions	56	10	10	8	40	WILEY	HOBOKEN	PHYTOTHER RES	MAR	2021	35	3	1468	1485		10.1002/ptr.6910		18	Chemistry, Medicinal; Pharmacology & Pharmacy	Science Citation Index Expanded (SCI-EXPANDED)	Pharmacology & Pharmacy	RC2XA	33215776		2022-05-29	WOS:000591186600001
J	Kennedy, MHE; Brosschot, TP; Lawrence, KM; FitzPatrick, RD; Lane, JM; Mariene, GM; Wasmuth, JD; Reynolds, LA		Small Intestinal Levels of the Branched Short-Chain Fatty Acid Isovalerate Are Elevated during Infection with Heligmosomoides polygyrus and Can Promote Helminth Fecundity	INFECTION AND IMMUNITY	English	Article	bacterial microbiota; chronic infections; helminths; isovaleric acid; short-chain fatty acids	Heligmosomoides polygyrus is a helminth which naturally infects mice and is widely used as a laboratory model of chronic small intestinal helminth infection. While it is known that infection with H. polygyrus alters the composition of the host's bacterial microbiota, the functional implications of this alteration are unclear. We investigated the impact of H. polygyrus infection on short-chain fat…	Natural Sciences and Engineering Research Council of Canada (NSERC) [RGPIN-2017-03801]; Canadian Foundation for Innovation (CFI) [36419]; British Columbia Knowledge Development Fund (BCKDF)	Natural Sciences and Engineering Research Council of Canada (NSERC)(Natural Sciences and Engineering Research Council of Canada (NSERC)); Canadian Foundation for Innovation (CFI)(Canada Foundation for Innovation); British Columbia Knowledge Development Fund (BCKDF)	41	0	0	3	3	AMER SOC MICROBIOLOGY	WASHINGTON	INFECT IMMUN	NOV	2021	89	12			e00225-21	10.1128/IAI.00225-21		12	Immunology; Infectious Diseases	Science Citation Index Expanded (SCI-EXPANDED)	Immunology; Infectious Diseases	YX3JW	34460289	Green Published	2022-05-29	WOS:000754004400002
J	Mohamed, SS; Abdeltawab, NF; Wadie, W; Ahmed, LA; Ammar, RM; Rabini, S; Abdel-Aziz, H; Khayyal, MT		Effect of the standard herbal preparation, STW5, treatment on dysbiosis induced by dextran sodium sulfate in experimental colitis	BMC COMPLEMENTARY MEDICINE AND THERAPIES	English	Article	Dysbiosis; Gut microbiota; STW 5; Ulcerative colitis	Background The standardized herbal preparation, STW 5, is effective clinically in functional gastrointestinal disorders and experimentally in ulcerative colitis (UC). The present study explores whether the beneficial effect of STW 5 involves influencing the intestinal microbiota. Methods UC was induced in Wistar rats by feeding them 5% dextran sodium sulfate (DSS) in drinking water for 7 days. Ra…	Bayer Consumer Health; Steigerwald Arzneimittelwerk GmbH, Darmstadt, Germany	Bayer Consumer Health; Steigerwald Arzneimittelwerk GmbH, Darmstadt, Germany	49	2	2	1	4	BMC	LONDON	BMC COMPLEMENT MED	2022-06-08	2021	21	1			168	10.1186/s12906-021-03337-8		12	Integrative & Complementary Medicine	Science Citation Index Expanded (SCI-EXPANDED)	Integrative & Complementary Medicine	SU1JL	34103031	Green Published, gold	2022-05-29	WOS:000662896800003
J	Nakajima, A; Shibuya, T; Sasaki, T; Lu, YJ; Ishikawa, D; Haga, K; Takahashi, M; Kaga, N; Osada, T; Sato, N; Nagahara, A		Nicotine Oral Administration Attenuates DSS-Induced Colitis Through Upregulation of Indole in the Distal Colon and Rectum in Mice	FRONTIERS IN MEDICINE	English	Article	nicotine; ulcerative colitis; indole; Clostridium; Porphyromonas; mice	Nicotine affects the gastrointestinal environment and modulates ulcerative colitis (UC). However, the associations among nicotine, gut metabolites, and UC are still largely unknown. We investigated whether orally administered nicotine affected gut metabolites and dextran sodium sulfate (DSS)-induced colitis. C57BL/6 male mice were orally administered nicotine solution in drinking water prior to i…	Takeda Research Support; Mitsubishi Tanabe Pharma Corporation [MTPS20200527020]	Takeda Research Support; Mitsubishi Tanabe Pharma Corporation(Mitsubishi Tanabe Pharma Corporation)	38	0	0	4	4	FRONTIERS MEDIA SA	LAUSANNE	FRONT MED-LAUSANNE	2022-12-13	2021	8				789037	10.3389/fmed.2021.789037		8	Medicine, General & Internal	Science Citation Index Expanded (SCI-EXPANDED)	General & Internal Medicine	YI2DB	34966763	gold, Green Published	2022-05-29	WOS:000743663700001
J	Tamer, SA; Yildirim, A; Cevik, O; Aksu, B; Yuksel, M; Dertsiz, EK; Sirvanci, S; Yegen, BC		The ameliorative effects of melatonin on acetic acid-induced gastric ulcer in rats via its modulatory effects on gut microbiota	CUKUROVA MEDICAL JOURNAL	Turkish	Article	Stomach ulcer; acetic acid; melatonin	Purpose: The aim of this study was of observe the possible protective effects of melatonin pretreatment on oxidative damage and microbiota alteration due to gastric ulcer in rats. Materials and Methods: Wistar-albino rats were given (n=32) melatonin (4 mg/kg/day), antibiotic mixture (AB; 1g/L ampicillin + 1g/L neomycin + 1g/L metronidazole), melatonin+AB in drinking water for 12 days or tap water…			65	0	0	0	2	CUKUROVA UNIV, FAC MEDICINE	ADANA	CUKUROVA MED J		2021	46	1	186	200		10.17826/cumj.779854		15	Medicine, General & Internal	Emerging Sources Citation Index (ESCI)	General & Internal Medicine	RC4TY			2022-05-29	WOS:000632797000021
J	Mao, JW; Zhao, PH; Wang, Q; Chen, AX; Li, XZ; Li, XJ; Liu, TX; Tao, ZF; Wang, X; Du, YR; Gong, M; Song, L; Gao, Y; Shi, HS		Repeated 3,3-Dimethyl-1-butanol exposure alters social dominance in adult mice	NEUROSCIENCE LETTERS	English	Article	3,3-Dimethyl-1-butanol; Social dominance; Gut microbiota; Trimethylamine oxide; Social behaviors	The influence of gut microbiota on brain function and brain disorders has been attracted more and more attention. Trimethylamine N-oxide (TMAO), an indirect metabolite of gut microbiota, has been linked to aging, cognitive impairment, and other brain disorders. However, the relationship between TMAO and social behaviors are still poorly understood. Adult male mice were exposed to drinking water c…	National Natural Science Foundation of China [81771462]; CAMS Innovation Fund for Medical Sciences [2019I2M5055]; Natural Science Foundation of Hebei Province [H2018206119, A201802022, H2020206523]; Hebei Medical University [USIP2020016, USIP2020097, USIP2020060]	National Natural Science Foundation of China(National Natural Science Foundation of China (NSFC)); CAMS Innovation Fund for Medical Sciences; Natural Science Foundation of Hebei Province(Natural Science Foundation of Hebei Province); Hebei Medical University	28	0	0	6	15	ELSEVIER IRELAND LTD	CLARE	NEUROSCI LETT	2022-07-27	2021	758				136006	10.1016/j.neulet.2021.136006		8	Neurosciences	Science Citation Index Expanded (SCI-EXPANDED)	Neurosciences & Neurology	SV3WQ	34098029		2022-05-29	WOS:000663753100004
J	Yamashita, T; Tai, S; Tsukahara, T; Inoue, R		Fusobacterium nucleatum impedes remission of colitis in a mouse model	BIOSCIENCE BIOTECHNOLOGY AND BIOCHEMISTRY	English	Article	Fusobacterium nucleatum; inflammatory bowel disease; remission of colitis; mucosa-associated microbiota	The role of Fusobacterium nucleatum, often associated with intestinal diseases, in the remission of dextran sulfate sodium (DSS)-induced colitis was investigated. Female mice were divided into groups DC (DSS control) and DF (DSS + F. nucleatum). F. nucleatum (1.0 x 10(10) cfu/mouse/day) in phosphate-buffered saline (PBS) was orally given to DF, while DC had PBS only. All mice had DSS in drinking …			38	3	3	1	2	OXFORD UNIV PRESS	OXFORD	BIOSCI BIOTECH BIOCH	2022-04-24	2021	85	5	1235	1242		10.1093/bbb/zbab029		8	Biochemistry & Molecular Biology; Biotechnology & Applied Microbiology; Chemistry, Applied; Food Science & Technology	Science Citation Index Expanded (SCI-EXPANDED)	Biochemistry & Molecular Biology; Biotechnology & Applied Microbiology; Chemistry; Food Science & Technology	TA5UD	33674867		2022-05-29	WOS:000667313300025
J	Gall, AJ; Griffin, GD		Anxiolytic effects of administration of a commercially available prebiotic blend of galacto-oligosaccharides and beta glucans in Sprague-Dawley rats	BENEFICIAL MICROBES	English	Article	anxiety; prebiotic; galacto-oligosaccharides; behaviour; microbiota	Prebiotics are nondigestible food agents that stimulate the growth of bacteria in the gut, whereas probiotics are live microorganisms that replace or restore beneficial bacteria in the digestive tract. Both agents have been shown to have beneficial qualities within the microbiota-gut-brain axis, but the behavioural effects of prebiotics have been less studied than probiotics. Whereas several stud…	Neuroscience Program at Hope College	Neuroscience Program at Hope College	45	1	1	3	6	WAGENINGEN ACADEMIC PUBLISHERS	WAGENINGEN	BENEF MICROBES		2021	12	4	35	43		10.3920/BM2020.0169		9	Microbiology; Nutrition & Dietetics	Science Citation Index Expanded (SCI-EXPANDED)	Microbiology; Nutrition & Dietetics	UK5QQ	34169805		2022-05-29	WOS:000692024600004
J	Kim, YJ; Kim, BK; Park, SJ; Kim, JH		Impact of Fusobacterium nucleatum in the gastrointestinal tract on natural killer cells	WORLD JOURNAL OF GASTROENTEROLOGY	English	Article	Fusobacterium nucleatum; Natural killer cells; Colorectal cancer	BACKGROUND Gut microbial dysbiosis contributes to the development and progression of colorectal cancer (CRC). Natural killer (NK) cells are involved in early defense mechanisms to kill infective pathogens and tumor cells by releasing chemokines and cytokines. To better understand the relationship between the gut microbiome and CRC, it was hypothesized here that a high abundance of Fusobacterium n…	National Research Foundation of Korea (NRF) - Korea government (MSIT) [2017R1C1B5017576]	National Research Foundation of Korea (NRF) - Korea government (MSIT)	33	4	4	0	2	BAISHIDENG PUBLISHING GROUP INC	PLEASANTON	WORLD J GASTROENTERO	2022-08-07	2021	27	29	4879	4889		10.3748/wjg.v27.i29.4879		11	Gastroenterology & Hepatology	Science Citation Index Expanded (SCI-EXPANDED)	Gastroenterology & Hepatology	UJ2AZ	34447232	Green Published, hybrid	2022-05-29	WOS:000691096200009
J	Jia, JB; Zhang, W; Wu, YX; Zhang, XL; Li, CJ; Wang, JZ; Yan, B		Mitigation of Obesity-Related Systemic Low-Grade Inflammation and Gut Microbial Dysbiosis in Mice with Nanosilver Supplement	ACS APPLIED BIO MATERIALS	English	Article	nanosilver; low-grade inflammation; gut microbiota; obesity; healthcare; eWAT inflammation	Systemic low-grade inflammation and imbalance of gut microbiota are important risk factors promoting the progression of obesity-related metabolic disorders. This provides potential pharmacological and nutritional targets for the management of obesity and obesity-related disorders. Here, we evaluated the modulatory effects of nanosilver on obesity-related systemic low-grade inflammation and gut mi…	National Natural Science Foundation of China [21906035, 22036002, 91643204]; National Key R&D Program of China [2016YFA0203103]; Pearl River Talent Recruitment Program of Guangdong Province [2019ZT08L387]	National Natural Science Foundation of China(National Natural Science Foundation of China (NSFC)); National Key R&D Program of China; Pearl River Talent Recruitment Program of Guangdong Province	68	0	0	8	17	AMER CHEMICAL SOC	WASHINGTON	ACS APPL BIO MATER	2022-03-15	2021	4	3	2570	2582		10.1021/acsabm.0c01560		13	Nanoscience & Nanotechnology; Materials Science, Biomaterials	Emerging Sources Citation Index (ESCI)	Science & Technology - Other Topics; Materials Science	QY6SS	35014374		2022-05-29	WOS:000630168200051
J	McCormick, NE; Earle, M; Ha, C; Hakes, L; Evans, A; Anderson, L; Stoddart, AK; Langille, MGI; Gagnon, GA		Biological and physico-chemical mechanisms accelerating the acclimation of Mn-removing biofilters	WATER RESEARCH	English	Article	Manganese; Biofiltration; Microbiome; Acclimation; Homogeneous oxidation; Redox Modelling	This study investigated treatment strategies which accelerated the acclimation of new Mn-removing biofilters to help utilities respond to changing Mn regulations, such as the recent introduction of a health-based maximum acceptable concentration and a reduction in the aesthetic objective for Mn in drinking water by Health Canada. Bench-scale filters of either GAC or anthracite media were fed with…			57	0	0	20	22	PERGAMON-ELSEVIER SCIENCE LTD	OXFORD	WATER RES	2022-12-01	2021	207				117793	10.1016/j.watres.2021.117793		11	Engineering, Environmental; Environmental Sciences; Water Resources	Science Citation Index Expanded (SCI-EXPANDED)	Engineering; Environmental Sciences & Ecology; Water Resources	WP7KS	34715404		2022-05-29	WOS:000713306300009
J	Videja, M; Vilskersts, R; Korzh, S; Cirule, H; Sevostjanovs, E; Dambrova, M; Makrecka-Kuka, M		Microbiota-Derived Metabolite Trimethylamine N-Oxide Protects Mitochondrial Energy Metabolism and Cardiac Functionality in a Rat Model of Right Ventricle Heart Failure	FRONTIERS IN CELL AND DEVELOPMENTAL BIOLOGY	English	Article	trimethylamine N-oxide; right ventricular dysfunction; monocrotaline; mitochondrial function; cardiovascular diseases	Aim: Trimethylamine N-oxide (TMAO) is a gut microbiota-derived metabolite synthesized in host organisms from specific food constituents, such as choline, carnitine and betaine. During the last decade, elevated TMAO levels have been proposed as biomarkers to estimate the risk of cardiometabolic diseases. However, there is still no consensus about the role of TMAO in the pathogenesis of cardiovascu…	Latvian Council of Science project Trimethylamine-N-oxide as a link between unhealthy diet and cardiometabolic risks [Izp-2018/1-0081]	Latvian Council of Science project Trimethylamine-N-oxide as a link between unhealthy diet and cardiometabolic risks	66	8	8	1	7	FRONTIERS MEDIA SA	LAUSANNE	FRONT CELL DEV BIOL	2022-01-14	2021	8				622741	10.3389/fcell.2020.622741		11	Cell Biology; Developmental Biology	Science Citation Index Expanded (SCI-EXPANDED)	Cell Biology; Developmental Biology	PY8WV	33520996	gold, Green Published	2022-05-29	WOS:000612322800001
J	Akar, F; Sumlu, E; Alcigir, ME; Bostanci, A; Sadi, G		Potential mechanistic pathways underlying intestinal and hepatic effects of kefir in high-fructose-fed rats	FOOD RESEARCH INTERNATIONAL	English	Article	Dietary fructose; Kefir; Microbiota; Permeability factors; Lipogenesis; Insulin signaling	Excess intake of fructose may contribute to the high prevalence of metabolic disorder. In this study, we investigated the effects of kefir supplementation on the intestine-liver-adipose tissue axis in metabolic disorder induced by high-fructose diet in rats to describe mechanistic action and potential therapeutic value of kefir. Fructose was given to the rats as a 20% solution in drinking water f…	Gazi University Research Fund [02/201814]	Gazi University Research Fund(Gazi University)	79	4	4	20	27	ELSEVIER	AMSTERDAM	FOOD RES INT	MAY	2021	143				110287	10.1016/j.foodres.2021.110287		18	Food Science & Technology	Science Citation Index Expanded (SCI-EXPANDED)	Food Science & Technology	SU7HT	33992387		2022-05-29	WOS:000663304300001
J	Krishna, KCB; Sathasivan, A; Ginige, MP		An assessment of the persistence of putative pathogenic bacteria in chloraminated water distribution systems	WATER RESEARCH	English	Article	Chloramine; Microbiological safety; Water supply; Water quality guidelines; Monitoring; Nitrification	This study investigated how a chloramine loss and nitrifying conditions influenced putative pathogenic bacterial diversity in bulk water and biofilm of a laboratory- and a full-scale chloraminated water distribution systems. Fifty-four reference databases containing full-length 16S rRNA gene sequences obtained from the National Centre for Biotechnology Information database were prepared to repres…	Curtin University; Australian Research Council (ARC) [LP0776766, LP160100909]; Commonwealth Scientific and Industrial Research Organisation (CSIRO); Water Corporation; Sydney Water Corporation; Seqwater; Unity Water; Queensland Urban Utilities; Logan City Council	Curtin University; Australian Research Council (ARC)(Australian Research Council); Commonwealth Scientific and Industrial Research Organisation (CSIRO)(Commonwealth Scientific & Industrial Research Organisation (CSIRO)); Water Corporation; Sydney Water Corporation; Seqwater; Unity Water; Queensland Urban Utilities; Logan City Council	63	1	1	11	26	PERGAMON-ELSEVIER SCIENCE LTD	OXFORD	WATER RES	2022-02-15	2021	190				116677	10.1016/j.watres.2020.116677		11	Engineering, Environmental; Environmental Sciences; Water Resources	Science Citation Index Expanded (SCI-EXPANDED)	Engineering; Environmental Sciences & Ecology; Water Resources	RC4YB	33310436		2022-05-29	WOS:000632807700007
J	Honorio-Javes, CE; Vallenas-Sanchez, Y; Perez, JTB		Bacteriophage cocktail as a substitute for antibiotic-type growth promoters in poultry	SCIENTIA AGROPECUARIA	Spanish	Review	gut microbiota; antimicrobial resistance; phage resistance; phage therapy; Salmonella spp.; E. coli	Aviculture is forced to find alternatives to replace antibiotic-type growth promoters to reduce antimicrobial resistance. Among these alternatives we have bacteriophages that are the natural predators of bacteria; however, research point out to their use as therapeutics and not as growth promoters. For this reason, this review article focuses on discussing and projecting the use of lithic bacteri…			56	0	0	1	1	UNIV NACL TRUJILLO, FAC CIENCIAS AGROPECUARIAS	TRUJILLO	SCI AGROPEC	OCT-DEC	2021	12	4	499	508		10.17268/sci.agropecu.2021.054		10	Agriculture, Dairy & Animal Science	Emerging Sources Citation Index (ESCI)	Agriculture	YE4KA		Green Published	2022-05-29	WOS:000741095500005
J	Hsu, CN; Hung, CH; Hou, CY; Chang, CI; Tain, YL		Perinatal Resveratrol Therapy to Dioxin-Exposed Dams Prevents the Programming of Hypertension in Adult Rat Offspring	ANTIOXIDANTS	English	Article	developmental origins of health and disease (DOHaD); gut microbiota; resveratrol; aryl hydrocarbon receptor; 3; 3-dimethyl-1-butanol; 2; 3; 7; 8-tetrachlorodibenzo-p-dioxin (TCDD); inflammation; T helper 17 cells; hypertension	Exposure to environmental chemicals during pregnancy and lactation is a contributing factor in gut microbiota dysbiosis and linked to programming of hypertension. 2,3,7,8-tetrachlorodibenzo-p-dioxin (TCDD), the most toxic dioxin, induces toxic effects by mediating aryl hydrocarbon receptor (AHR). Resveratrol, a potent antioxidant with prebiotic properties, can possess high affinity for AHR and pr…	Kaohsiung Chang Gung Memorial Hospital, Kaohsiung, Taiwan [CORPG8K0121]	Kaohsiung Chang Gung Memorial Hospital, Kaohsiung, Taiwan	36	3	3	0	1	MDPI	BASEL	ANTIOXIDANTS-BASEL	SEP	2021	10	9			1393	10.3390/antiox10091393		11	Biochemistry & Molecular Biology; Chemistry, Medicinal; Food Science & Technology	Science Citation Index Expanded (SCI-EXPANDED)	Biochemistry & Molecular Biology; Pharmacology & Pharmacy; Food Science & Technology	UV1WT	34573025	Green Published, gold	2022-05-29	WOS:000699278600001
J	Chen, XQ; Lv, XY; Liu, SJ		Baitouweng decoction alleviates dextran sulfate sodium-induced ulcerative colitis by regulating intestinal microbiota and the IL-6/STAT3 signaling pathway	JOURNAL OF ETHNOPHARMACOLOGY	English	Article	Baitouweng decoction; Ulcerative colitis; Dextran sulfate sodium; Intestinal flora; IL-6/STAT3 pathway	Ethnopharmacological relevance: Baitouweng (BTW) decoction, a Chinese traditional medicine prescription, has been used to treat ulcerative colitis (UC) over hundreds of years. In this study, we investigated the anti-inflammatory effects of BTW and intestinal flora of dextran sulfate sodium (DSS)-induced UC mice, and we investigated the mechanism of BTW in the preliminary treatment of UC. Aim of s…	National Natural Science Foundation of China [81774096, 81704099, 81803694]; Open Projects of the Discipline of Chinese Medicine of Nanjing University of Chinese Medicine - Subject of Academic Priority Discipline of Jiangsu Higher Education Institutions [ZYX03KF031]; Jiangsu Provincial Medical Youth Talent [QNRC2016642, LGY2018061]; Young Elite Scientists Sponsorship Program by CAST [QNRC2-B04]; …	National Natural Science Foundation of China(National Natural Science Foundation of China (NSFC)); Open Projects of the Discipline of Chinese Medicine of Nanjing University of Chinese Medicine - Subject of Academic Priority Discipline of Jiangsu Higher Education Institutions; Jiangsu Provincial Medical Youth Talent; Young Elite Scientists Sponsorship Program by CAST; top six talent project of Jia…	42	8	9	8	67	ELSEVIER IRELAND LTD	CLARE	J ETHNOPHARMACOL	2022-01-30	2021	265				113357	10.1016/j.jep.2020.113357		12	Plant Sciences; Chemistry, Medicinal; Integrative & Complementary Medicine; Pharmacology & Pharmacy	Science Citation Index Expanded (SCI-EXPANDED)	Plant Sciences; Pharmacology & Pharmacy; Integrative & Complementary Medicine	OI4YS	32891820		2022-05-29	WOS:000583286600061
J	Salehi, S; Sadeghi, A; Karimi, A		Growth performance, nutrients digestibility, caecum microbiota, antioxidant status and immunity of broilers as influenced by kombucha fermented on white sugar or sugar beet molasses	ITALIAN JOURNAL OF ANIMAL SCIENCE	English	Article	Antibody titre; coliforms; digestibility; Lactobacillus; superoxide dismutase	The purpose of this study was to evaluate the effects of fermented kombucha on green tea with white sugar or sugar beet molasses in broiler chickens. Birds (n = 448) were randomly allotted into seven treatments of four replicates each. Treatments were included: tap water with no kombucha (Control), water containing 3 ml/100 ml kombucha based on white sugar (SK3%), water containing 6 ml/100 ml kom…	University of Kurdistan	University of Kurdistan	50	0	0	4	5	TAYLOR & FRANCIS LTD	ABINGDON	ITAL J ANIM SCI	2022-01-01	2021	20	1	1770	1780		10.1080/1828051X.2021.1941335		11	Agriculture, Dairy & Animal Science; Agriculture, Multidisciplinary; Veterinary Sciences	Science Citation Index Expanded (SCI-EXPANDED)	Agriculture; Veterinary Sciences	WJ6BF		gold	2022-05-29	WOS:000709127600001
J	Chac, D; Dunmire, CN; Singh, J; Weil, AA		Update on Environmental and Host Factors Impacting the Risk of Vibrio cholerae Infection	ACS INFECTIOUS DISEASES	English	Review	Vibrio cholerae; cholera; microbiota; immune response; diarrhea	Vibrio cholerae is the causative agent of cholera, a diarrheal disease that kills tens of thousands of people each year. Cholera is transmitted primarily by the ingestion of drinking water contaminated with fecal matter, and a safe water supply remains out of reach in many areas of the world. In this Review, we discuss host and environmental factors that impact the susceptibility to V. cholerae i…			141	0	0	2	8	AMER CHEMICAL SOC	WASHINGTON	ACS INFECT DIS	2022-05-14	2021	7	5	1010	1019		10.1021/acsinfecdis.0c00914		10	Chemistry, Medicinal; Infectious Diseases	Science Citation Index Expanded (SCI-EXPANDED)	Pharmacology & Pharmacy; Infectious Diseases	SE1AF	33844507		2022-05-29	WOS:000651806300008
J	Jerez-Morales, A; Merino, JS; Diaz-Castillo, ST; Smith, CT; Fuentealba, J; Bernasconi, H; Echeverria, G; Garcia-Cancino, A		The Administration of the Synbiotic Lactobacillus bulgaricus 6c3 Strain, Inulin and Fructooligosaccharide Decreases the Concentrations of Indoxyl Sulfate and Kidney Damage in a Rat Model	TOXINS	English	Article	CKD; indoxyl sulfate; CVD; renal fibrosis; synbiotic	Indoxyl sulfate (IS) is involved in the progression of chronic kidney disease (CKD) and in its cardiovascular complications. One of the approaches proposed to decrease IS is the administration of synbiotics. This work aimed to search for a probiotic strain capable to decrease serum IS levels and mix it with two prebiotics (inulin and fructooligosaccharide (FOS)) to produce a putative synbiotic an…	CORFO (Chile) [12377IN-435 IEN]	CORFO (Chile)	44	3	3	2	4	MDPI	BASEL	TOXINS	MAR	2021	13	3			192	10.3390/toxins13030192		13	Food Science & Technology; Toxicology	Science Citation Index Expanded (SCI-EXPANDED)	Food Science & Technology; Toxicology	RE5YD	33800029	Green Published, gold	2022-05-29	WOS:000634228300001
J	Bu, F; Ding, Y; Chen, T; Wang, Q; Wang, R; Zhou, JY; Jiang, F; Zhang, D; Xu, MM; Shi, GP; Chen, YG		Total flavone of Abelmoschus Manihot improves colitis by promoting the growth of Akkermansia in mice	SCIENTIFIC REPORTS	English	Article		The total flavone of Abelmoschus manihot (TFA), a compound extracted from the flowers of Abelmoschus manihot (L.) Medic, has been widely used for the treatment of Crohn's disease, chronic glomerulonephritis and other diseases. The aim of this study was to investigate the effect of TFA on the gut microbiota and intestinal barrier in dextran sulfate sodium (DSS)-induced experimental colitis. C57BL/…	National Natural Science Foundation of China [81873309]; Graduate student scientific research innovation Projects in Jiangsu province [KYCX21_1674]	National Natural Science Foundation of China(National Natural Science Foundation of China (NSFC)); Graduate student scientific research innovation Projects in Jiangsu province	39	1	1	6	7	NATURE PORTFOLIO	BERLIN	SCI REP-UK	2022-10-21	2021	11	1			20787	10.1038/s41598-021-00070-7		12	Multidisciplinary Sciences	Science Citation Index Expanded (SCI-EXPANDED)	Science & Technology - Other Topics	WK7VO	34675239	gold, Green Published, Green Submitted	2022-05-29	WOS:000709931300001
J	Heimesaat, MM; Mousavi, S; Weschka, D; Bereswill, S		Anti-Pathogenic and Immune-Modulatory Effects of Peroral Treatment with Cardamom Essential Oil in Acute Murine Campylobacteriosis	MICROORGANISMS	English	Article	cardamom essential oil; enteropathogenic infection; Campylobacter jejuni; immune-modulatory effects; antipathogenic effects; microbiota-depleted IL-10(-/-) mice; campylobacteriosis model; host-pathogen interaction; preclinical intervention study	Human infections with enteropathogenic Campylobacter jejuni (C. jejuni) including multi-drug resistant isolates are emerging worldwide. Antibiotics-independent approaches in the combat of campylobacteriosis are therefore highly desirable. Since the health-beneficial including anti-inflammatory and anti-infectious properties of cardamom have been acknowledged for long, we here addressed potential …	German Federal Ministries of Education and Research (BMBF) [IP7/01KI1725D]; Federal Ministry for Economic Affairs and Energy [ZF4117908 AJ8]	German Federal Ministries of Education and Research (BMBF)(Federal Ministry of Education & Research (BMBF)); Federal Ministry for Economic Affairs and Energy	57	7	7	2	9	MDPI	BASEL	MICROORGANISMS	JAN	2021	9	1			169	10.3390/microorganisms9010169		18	Microbiology	Science Citation Index Expanded (SCI-EXPANDED)	Microbiology	PW3PT	33466708	gold, Green Published	2022-05-29	WOS:000610585400001
J	Bereswill, S; Mousavi, S; Weschka, D; Buczkowski, A; Schmidt, S; Heimesaat, MM		Peroral Clove Essential Oil Treatment Ameliorates Acute Campylobacteriosis-Results from a Preclinical Murine Intervention Study	MICROORGANISMS	English	Article	clove essential oil; enteropathogenic infection; Campylobacter jejuni; immune-modulatory effects; microbiota-depleted IL-10(-/-) mice; acute campylobacteriosis model; host-pathogen interaction; preclinical intervention study; natural antibiotics-independent compounds; eugenol	Campylobacter (C.) jejuni infections pose progressively emerging threats to human health worldwide. Given the rise in antibiotic resistance, antibiotics-independent options are required to fight campylobacteriosis. Since the health-beneficial effects of clove have been known for long, we here analyzed the antimicrobial and immune-modulatory effects of clove essential oil (EO) during acute experim…	German Federal Ministries of Education and Research (BMBF) [IP7/01KI1725D]; Federal Ministry for Economic Affairs and Energy [ZF4117908 AJ8]	German Federal Ministries of Education and Research (BMBF)(Federal Ministry of Education & Research (BMBF)); Federal Ministry for Economic Affairs and Energy	50	5	5	0	3	MDPI	BASEL	MICROORGANISMS	APR	2021	9	4			735	10.3390/microorganisms9040735		18	Microbiology	Science Citation Index Expanded (SCI-EXPANDED)	Microbiology	RR7YH	33807493	Green Published, gold	2022-05-29	WOS:000643308400001
J	Bereswill, S; Mousavi, S; Weschka, D; Heimesaat, MM		Disease-Alleviating Effects of Peroral Activated Charcoal Treatment in Acute Murine Campylobacteriosis	MICROORGANISMS	English	Article	activated charcoal; enteropathogenic infection; Campylobacter jejuni; immune-modulatory effects; microbiota-depleted IL-10(-/-) mice; campylobacteriosis model; host-pathogen interaction; preclinical intervention study; natural antibiotics-independent compounds	Foodborne Campylobacter jejuni infections are on the rise and responsible for worldwide serious health issues. Increasing resistance of C. jejuni strains against antimicrobial treatments, necessitates antibiotics-independent treatment options for acute campylobacteriosis. Activated charcoal (AC) constitutes a long-known and safe compound for the treatment of bacterial enteritis. In this preclinic…	German Federal Ministries of Education and Research (BMBF) [IP7/01KI2007D]; Federal Ministry for Economic Affairs and Energy [ZF4117908 AJ8]	German Federal Ministries of Education and Research (BMBF)(Federal Ministry of Education & Research (BMBF)); Federal Ministry for Economic Affairs and Energy	58	0	0	0	3	MDPI	BASEL	MICROORGANISMS	JUL	2021	9	7			1424	10.3390/microorganisms9071424		17	Microbiology	Science Citation Index Expanded (SCI-EXPANDED)	Microbiology	TN8IZ	34209438	Green Published, gold	2022-05-29	WOS:000676473200001
J	Xu, HY; Hiraishi, K; Kurahara, LH; Nakano-Narusawa, Y; Li, XD; Hu, YP; Matsuda, Y; Zhang, HP; Hirano, K		Inhibitory Effects of Breast Milk-Derived Lactobacillus rhamnosus Probio-M9 on Colitis-Associated Carcinogenesis by Restoration of the Gut Microbiota in a Mouse Model	NUTRIENTS	English	Article	inflammatory bowel disease; colitis-associated tumorigenesis; probiotic; Lactobacillus rhamnosus M9	Chronic inflammation is a risk factor for colorectal cancer, and inflammatory cytokines secreted from inflammatory cells and active oxygen facilitate tumorigenesis. Intestinal bacteria are thought to regulate tumorigenesis. The longer the breastfeeding period, the lower is the risk of inflammatory bowel disease. Here, we investigated preventive effects of the probiotic Lactobacillus rhamnosus M9 …	Asia-centered International Joint Research Promotion Fund of Kagawa University Research Promotion Program 2020 (KURPP); MEXTSupported Program supporting the research activities of female researchers; Gender Equality Promotion Office of Kagawa University; Central Research Institute of Fukuoka University grant [196001]	Asia-centered International Joint Research Promotion Fund of Kagawa University Research Promotion Program 2020 (KURPP); MEXTSupported Program supporting the research activities of female researchers; Gender Equality Promotion Office of Kagawa University; Central Research Institute of Fukuoka University grant	33	4	4	8	19	MDPI	BASEL	NUTRIENTS	APR	2021	13	4			1143	10.3390/nu13041143		15	Nutrition & Dietetics	Science Citation Index Expanded (SCI-EXPANDED)	Nutrition & Dietetics	RR9IB	33808480	gold, Green Published	2022-05-29	WOS:000643401600001
J	Yang, X; Tang, T; Wen, J; Li, MC; Chen, J; Li, TY; Dai, Y; Cheng, Q		Effects of S24-7 on the weight of progeny rats after exposure to ceftriaxone sodium during pregnancy	BMC MICROBIOLOGY	English	Article	Ceftriaxone sodium; S24-7; Valine; Leucine and isoleucine biosynthesis	Antibiotic exposure during pregnancy will adversely affect the growth of offspring; however, this remains controversial and the mechanism is poorly understood. To study this phenomenon, we added ceftriaxone sodium to the drinking water of pregnant rats and continuously monitored the body weight of their offspring. The results showed that compared with the control group, the offspring exposed to a…	Key Project of Chongqing Municipal Health and Family Planning Commission, China [2015ZDXM014]	Key Project of Chongqing Municipal Health and Family Planning Commission, China	31	0	0	2	4	BMC	LONDON	BMC MICROBIOL	2022-06-03	2021	21	1			166	10.1186/s12866-021-02231-0		10	Microbiology	Science Citation Index Expanded (SCI-EXPANDED)	Microbiology	SR2LN	34082715	Green Published, gold, Green Submitted	2022-05-29	WOS:000660875000002
J	Siedlecka, A; Wolf-Baca, M; Piekarska, K		Molecular insight into bacterial communities of consumer tap water - a case study	DESALINATION AND WATER TREATMENT	English	Article	Premise plumbing; Bacterial community composition; Bacterial biodiversity; Antibiotic resistance genes	The issue of consumer tap water (i.e., tap water collected without prior flushing - as drawn by consumers from household taps) is often neglected in scientific reports concerning drinking water microbiology. Although water companies usually provide water that is safe to drink, its microbial quality could significantly deteriorate within a building. In this study, four samples collected from taps …			40	0	0	5	5	DESALINATION PUBL	HOPKINTON	DESALIN WATER TREAT	MAY	2021	222		114	126		10.5004/dwt.2021.27098		13	Engineering, Chemical; Water Resources	Science Citation Index Expanded (SCI-EXPANDED)	Engineering; Water Resources	SJ5DI			2022-05-29	WOS:000655554600010
J	Shahsavari, E; Rouch, D; Khudur, LS; Thomas, D; Aburto-Medina, A; Ball, AS		Challenges and Current Status of the Biological Treatment of PFAS-Contaminated Soils	FRONTIERS IN BIOENGINEERING AND BIOTECHNOLOGY	English	Review	PFAS-contaminated soils; bioremediation; mycoremediation; bioaccumulation; bacteria; phytoremediation	Per- and polyfluoroalkyl substances (PFAS) are Synthetic Organic Compounds (SOCs) which are of current concern as they are linked to a myriad of adverse health effects in mammals. They can be found in drinking water, rivers, groundwater, wastewater, household dust, and soils. In this review, the current challenge and status of bioremediation of PFAs in soils was examined. While several technologi…			116	15	15	76	151	FRONTIERS MEDIA SA	LAUSANNE	FRONT BIOENG BIOTECH	2022-01-07	2021	8				602040	10.3389/fbioe.2020.602040		15	Biotechnology & Applied Microbiology; Multidisciplinary Sciences	Science Citation Index Expanded (SCI-EXPANDED)	Biotechnology & Applied Microbiology; Science & Technology - Other Topics	PU2FA	33490051	gold, Green Published	2022-05-29	WOS:000609120700001
J	Wang, K; Mou, XZ; Cao, HS; Struewing, I; Allen, J; Lu, JR		Co-occurring microorganisms regulate the succession of cyanobacterial harmful algal blooms*	ENVIRONMENTAL POLLUTION	English	Article	CyanoHABs; Bloom succession; Microbiome; Metatranscriptomics; Nitrogen limitation	Cyanobacterial harmful algal blooms (CyanoHABs) have been found to transmit from N2 fixer-dominated to nonN2 fixer-dominated in many freshwater environments when the supply of N decreases. To elucidate the mechanisms underlying such counter-intuitive CyanoHAB species succession, metatranscriptomes (biotic data) and water quality-related variables (abiotic data) were analyzed weekly during a bloom…	United States Environmental Protection Agency, Office of Research and Development's (ORD's) research programs: Safe and Sustainable Water Resources (SSWR) [4.01D, 4.3.1, 4.3.3]; National Science Foundation [CBET 1605161]	United States Environmental Protection Agency, Office of Research and Development's (ORD's) research programs: Safe and Sustainable Water Resources (SSWR); National Science Foundation(National Science Foundation (NSF))	60	2	2	15	25	ELSEVIER SCI LTD	OXFORD	ENVIRON POLLUT	2022-11-01	2021	288				117682	10.1016/j.envpol.2021.117682		12	Environmental Sciences	Science Citation Index Expanded (SCI-EXPANDED)	Environmental Sciences & Ecology	UR5YH	34271516	hybrid	2022-05-29	WOS:000696824200007
J	Fang, Q; Zheng, BJ; Liu, N; Liu, JF; Liu, WH; Huang, XY; Zeng, XC; Chen, LL; Li, ZY; Ouyang, DS		Trimethylamine N-Oxide Exacerbates Renal Inflammation and Fibrosis in Rats With Diabetic Kidney Disease	FRONTIERS IN PHYSIOLOGY	English	Article	trimethylamine N-oxide; diabetic kidney disease; inflammation; NLRP3; fibrosis	The gut microbiota plays a pivotal role in the onset and development of diabetes and its complications. Trimethylamine N-oxide (TMAO), a gut microbiota-dependent metabolite of certain nutrients, is associated with type 2 diabetes and its complications. Diabetic kidney disease (DKD) is one of the most serious microvascular complications. However, whether TMAO accelerates the development of DKD rem…	National Development of Key Novel Drugs for Special Projects of China [2017ZX09304014]; Hunan Key Laboratory for Bioanalysis of Complex Matrix Samples [2017TP1037]; Key R&D Programs of Hunan Province [2019SK2241]; Innovation and Entrepreneurship Investment Project in Hunan Province [2019GK5020]; International Scientific and Technological Innovation Cooperation Base for Bioanalysis of Complex Matr…	National Development of Key Novel Drugs for Special Projects of China; Hunan Key Laboratory for Bioanalysis of Complex Matrix Samples; Key R&D Programs of Hunan Province; Innovation and Entrepreneurship Investment Project in Hunan Province; International Scientific and Technological Innovation Cooperation Base for Bioanalysis of Complex Matrix Samples in Hunan Province; Science and Technology Pro…	72	5	5	6	7	FRONTIERS MEDIA SA	LAUSANNE	FRONT PHYSIOL	2022-06-16	2021	12				682482	10.3389/fphys.2021.682482		13	Physiology	Science Citation Index Expanded (SCI-EXPANDED)	Physiology	TB8XI	34220546	Green Published, gold	2022-05-29	WOS:000668228700001
J	Liu, Q; Lu, WW; Tian, FW; Zhao, JX; Zhang, H; Hong, K; Yu, LL		Akkermansia muciniphila Exerts Strain-Specific Effects on DSS-Induced Ulcerative Colitis in Mice	FRONTIERS IN CELLULAR AND INFECTION MICROBIOLOGY	English	Article	Akkermansia muciniphila; ulcerative colitis; intestinal inflammation; comparative genomics; strain-specific	Akkermansia muciniphila is a commensal bacterium of the gut mucus layer. Although both in vitro and in vivo data have shown that A. muciniphila strains exhibit strain-specific modulation of gut functions, its ability to moderate immunity to ulcerative colitis have not been verified. We selected three isolated human A. muciniphila strains (FSDLZ39M14, FSDLZ36M5 and FSDLZ20M4) and the A. muciniphil…	Natural Science Foundation of Jiangsu Province [BK20200084]; National Natural Science Foundation of China [32021005, 31820103010]; National first-class discipline program of Food Science and Technology [JUFSTR20180102]; Collaborative innovation center of food safety and quality control in Jiangsu Province	Natural Science Foundation of Jiangsu Province(Natural Science Foundation of Jiangsu Province); National Natural Science Foundation of China(National Natural Science Foundation of China (NSFC)); National first-class discipline program of Food Science and Technology; Collaborative innovation center of food safety and quality control in Jiangsu Province	50	1	1	11	11	FRONTIERS MEDIA SA	LAUSANNE	FRONT CELL INFECT MI	2022-08-04	2021	11				698914	10.3389/fcimb.2021.698914		11	Immunology; Microbiology	Science Citation Index Expanded (SCI-EXPANDED)	Immunology; Microbiology	UA2ZW	34422681	gold, Green Published	2022-05-29	WOS:000685033100004
J	Jin, C; Zhao, LN; Zhao, WG; Wang, LT; Zhu, SS; Xiao, ZH; Mo, YJ; Zhang, MY; Shu, LF; Qiu, RL		Transport and Retention of Free-Living Amoeba Spores in Porous Media: Effects of Operational Parameters and Extracellular Polymeric Substances	ENVIRONMENTAL SCIENCE & TECHNOLOGY	English	Article	amoeba; spores; transport in porous media; Dictyostelium discoideum; water treatment; extracellular polymeric substances (EPS)	Amoebas are protists that are widespread in water and soil environments. Some species are pathogenic, inducing potentially lethal effects on humans, making them a major threat to public health. Nonpathogenic amoebas are also of concern because they have the potential to carry a mini-microbiome of bacteria, either transiently or via more long-term stable transport. Due to their resistance to disin…	National Key Research and Development Program of China [2019YFC1805300]; National Natural Science Foundation of China [42007334, 31970384, 41907021]	National Key Research and Development Program of China; National Natural Science Foundation of China(National Natural Science Foundation of China (NSFC))	83	3	3	45	73	AMER CHEMICAL SOC	WASHINGTON	ENVIRON SCI TECHNOL	2022-07-06	2021	55	13	8709	8720		10.1021/acs.est.1c00785		12	Engineering, Environmental; Environmental Sciences	Science Citation Index Expanded (SCI-EXPANDED)	Engineering; Environmental Sciences & Ecology	TH1RL	34138552		2022-05-29	WOS:000671872100026
J	Kim, GB; Cayetano, RDA; Park, J; Jo, Y; Jeong, SY; Lee, MY; Kim, SH		Effect of low-thermal pretreatment on the methanogenic performance and microbiome population of continuous high-solid anaerobic digester treating dewatered sludge	BIORESOURCE TECHNOLOGY	English	Article	Dewatered sludge; Horizontal tubular anaerobic bioreactor; Methanogenic archaea; Methanogenesis; Methanogenic pathway	Undigested and dewatered sludge at 10% total solids was pretreated at 60 degrees C for 3 h and fed to a lab-scale horizontal anaerobic bioreactor for 130 days with solids retention time (SRTs) from 25 to 16 d. The low-thermal pretreatment enabled higher net energy production, improved sludge treatment efficiency, and enhanced digestion stability. The highest average biomethane yield and productio…	Korea Environment Industry & Technology Institute (KEITI) - Korea Ministry of Environment (MOE) [ARQ202001174001]; Korea Institute of Energy Technology Evaluation and Planning (KETEP); Ministry of Trade, Industry & Energy (MOTIE) of the Republic of Korea [20194110100010]	Korea Environment Industry & Technology Institute (KEITI) - Korea Ministry of Environment (MOE); Korea Institute of Energy Technology Evaluation and Planning (KETEP); Ministry of Trade, Industry & Energy (MOTIE) of the Republic of Korea	49	1	1	7	16	ELSEVIER SCI LTD	OXFORD	BIORESOURCE TECHNOL	DEC	2021	341				125756	10.1016/j.biortech.2021.125756		9	Agricultural Engineering; Biotechnology & Applied Microbiology; Energy & Fuels	Science Citation Index Expanded (SCI-EXPANDED)	Agriculture; Biotechnology & Applied Microbiology; Energy & Fuels	UR7IY	34419881		2022-05-29	WOS:000696919500013
J	Shi, YJ; Queller, DC; Tian, YH; Zhang, SY; Yan, QY; He, ZL; He, ZZ; Wu, CY; Wang, C; Shu, LF		The Ecology and Evolution of Amoeba-Bacterium Interactions	APPLIED AND ENVIRONMENTAL MICROBIOLOGY	English	Review	amoebae; bacteria; protist; ecology; evolution; mutualism; parasitism; symbiosis	Amoebae are protists that have complicated relationships with bacteria, covering the whole spectrum of symbiosis. Amoeba-bacterium interactions contribute to the study of predation, symbiosis, pathogenesis, and human health. Given the complexity of their relationships, it is necessary to understand the ecology and evolution of their interactions. In this paper, we provide an updated review of the…	National Natural Science Foundation of China [31970384, 41907021, 21806044]; Fundamental Research Funds for the Central Universities [19lgpy162]; Guangdong Basic and Applied Basic Research Foundation [2019A1515011406]; Hundred Talents Program through Sun Yat-Sen University [38000-18841205, 99318-18841205]	National Natural Science Foundation of China(National Natural Science Foundation of China (NSFC)); Fundamental Research Funds for the Central Universities(Fundamental Research Funds for the Central Universities); Guangdong Basic and Applied Basic Research Foundation; Hundred Talents Program through Sun Yat-Sen University	161	8	8	23	61	AMER SOC MICROBIOLOGY	WASHINGTON	APPL ENVIRON MICROB	JAN	2021	87	2			e01866-20	10.1128/AEM.01866-20		16	Biotechnology & Applied Microbiology; Microbiology	Science Citation Index Expanded (SCI-EXPANDED)	Biotechnology & Applied Microbiology; Microbiology	PO9BL	33158887	Green Published	2022-05-29	WOS:000605459800006
J	Ren, FZ; Yang, WB; Hu, JJ; Huang, PY; Jiao, XA; Huang, JL		Feeding Malic Acid to Chickens at Slaughter Age Improves Microbial Safety with Regard to Campylobacter	ANIMALS	English	Article	poultry production; malic acid; Campylobacter; microbial safety	Simple Summary Chicken meat has become a popular food that is consumed worldwide. However, chicken flocks suffer from Campylobacter infection during their rearing period. Campylobacter is the most serious pathogen colonizing chicken flocks which could be transmitted through the food chain and threaten public health. The traditional strategy of using antibiotics to inhibit pathogens in chicken flo…	National Key Research and Development Program of China [2018YFD0500500]; National Natural Science Foundation of China [32000093, 31872493]; Natural Science Foundation of the Higher Education Institutions of Jiangsu Province, China [20KJB180017]	National Key Research and Development Program of China; National Natural Science Foundation of China(National Natural Science Foundation of China (NSFC)); Natural Science Foundation of the Higher Education Institutions of Jiangsu Province, China	36	1	1	7	10	MDPI	BASEL	ANIMALS-BASEL	JUL	2021	11	7			1999	10.3390/ani11071999		10	Agriculture, Dairy & Animal Science; Veterinary Sciences; Zoology	Science Citation Index Expanded (SCI-EXPANDED)	Agriculture; Veterinary Sciences; Zoology	UB9JJ	34359127	Green Published, gold	2022-05-29	WOS:000686153500001
J	Teymouri, P; Khorshidi, KJ; Rezaeipour, V; Soumeh, EA		Efficacy of natural alternatives to antibiotic on the growth performance, gut microbial population, intestinal morphology, and serum biochemical metabolites of broiler chickens	ITALIAN JOURNAL OF ANIMAL SCIENCE	English	Article	Antibiotic; broiler chickens; morphology; microbiota; meat quality	The present study investigated the effects of different feed additives on growth performance, carcass characteristics, gut microbial population, intestinal morphology, and blood metabolites of broiler chickens. A total of 540, day-old Ross 308 male chicks were randomly distributed into 6 dietary treatments with 6 replicate pens per treatment for 35 days. The birds fed on a basal diet without feed…			44	1	1	0	0	TAYLOR & FRANCIS LTD	ABINGDON	ITAL J ANIM SCI	2022-01-01	2021	20	1	1801	1809		10.1080/1828051X.2021.1954558		9	Agriculture, Dairy & Animal Science; Agriculture, Multidisciplinary; Veterinary Sciences	Science Citation Index Expanded (SCI-EXPANDED)	Agriculture; Veterinary Sciences	WJ6AU		gold	2022-05-29	WOS:000709126500001
J	Saei, S; Di Rosa, AR; Rasouli, B; Seidavi, A; Chiofalo, V; Liotta, L; Chiofalo, B		Ajwain (Trachyspermum copticum) extract in broiler diets: effect on growth performance, carcass components, plasma constituents, immunity and cecum microflora	ITALIAN JOURNAL OF ANIMAL SCIENCE	English	Article	Poultry diet; ajwain extract; performance; blood and immunity parameters; caecum microflora	Hypothesis is that dietary ajwain (Trachyspermum copticum L.), a phytogenic feed additive, could improve the performance of broiler chickens. On a total of 200 Ross 308 male broilers, during the 42-d growing period (starter: day 1-14; grower: day 15-28 and finisher: day 29-42), varying levels of ajwain alcoholic extract (0, 150, 350 and 450 ppm) were added to the drinking water. A control treatme…	Rasht Branch, Islamic Azad University [17.16.4.18418]; Operative Program FESR (European Development Fund) [Sicily-AGRIVET-CUP G46D15000170009]	Rasht Branch, Islamic Azad University(Islamic Azad University); Operative Program FESR (European Development Fund)	48	0	0	0	3	TAYLOR & FRANCIS LTD	ABINGDON	ITAL J ANIM SCI	2022-01-01	2021	20	1	842	849		10.1080/1828051X.2021.1926347		8	Agriculture, Dairy & Animal Science; Agriculture, Multidisciplinary; Veterinary Sciences	Science Citation Index Expanded (SCI-EXPANDED)	Agriculture; Veterinary Sciences	SN7WL		gold	2022-05-29	WOS:000658498000001
J	Munoz, M; Cires, S; de Pedro, ZM; Colina, JA; Velasquez-Figueroa, Y; Carmona-Jimenez, J; Caro-Borrero, A; Salazar, A; Fuster, MCS; Contreras, D; Perona, E; Quesada, A; Casas, JA		Overview of toxic cyanobacteria and cyanotoxins in Ibero-American freshwaters: Challenges for risk management and opportunities for removal by advanced technologies	SCIENCE OF THE TOTAL ENVIRONMENT	English	Article	Ibero-America; Cyanobacteria; Cyanotoxin; Risk assessment; Decision-making systems; Advanced oxidation processes	The increasing occurrence of cyanobacterial blooms worldwide represents an important threat for both the environment and public health. In this context, the development of risk analysis and management tools as well as sustainable and cost-effective treatment processes is essential. The research project TALGENTOX, funded by the Ibero-American Science and Technology Program for Development (CYTED-2…	CYTED Ibero-American Science and Technology Program for Development (CYTED-2019) through the project TALGENTOX [920PTE0102]; Spanish MICINN [CGL2017-86258-R]; Spanish MINECO [RYC-2016-20648]	CYTED Ibero-American Science and Technology Program for Development (CYTED-2019) through the project TALGENTOX; Spanish MICINN(Spanish Government); Spanish MINECO(Spanish Government)	224	7	7	24	140	ELSEVIER	AMSTERDAM	SCI TOTAL ENVIRON	2022-03-20	2021	761				143197	10.1016/j.scitotenv.2020.143197		30	Environmental Sciences	Science Citation Index Expanded (SCI-EXPANDED)	Environmental Sciences & Ecology	PS2TS	33160675		2022-05-29	WOS:000607780900015
J	Rouse, ML; Kaji, K		Perinatal exposure to antibiotics reduces affiliative behavior after post-weaning in zebra finches (Taeniopygia guttata)	BEHAVIOURAL PROCESSES	English	Article	Antibiotics; Zebra finch; Affiliative behavior; Perinatal; Social behavior	Social behavior is influenced by a host of factors, including the immune system; for example, song quality in male starlings predicts immunocompetence suggesting the development of the immune system is interconnected with aspects social development (Duffy and Ball, 2002). Treating birds with antibiotics during the perinatal period may alter this development, and thereby, social behaviors beyond s…			34	0	0	0	1	ELSEVIER	AMSTERDAM	BEHAV PROCESS	NOV	2021	192				104491	10.1016/j.beproc.2021.104491		5	Psychology, Biological; Behavioral Sciences; Zoology	Science Citation Index Expanded (SCI-EXPANDED); Social Science Citation Index (SSCI)	Psychology; Behavioral Sciences; Zoology	WK9PO	34478805		2022-05-29	WOS:000710050900005
J	Gutierrez-Falcon, AI; Ramos-Nuez, AM; Zayas, AEDY; Castillo, DFP; Garcia-Laorden, MI; Chamizo-Lopez, FJ; Valcarcel, FR; Campelo, FA; Benitez, AB; Salgueiro, PN; Cabrera, CD; Rivero-Vera, JC; Gonzalez-Martin, JM; Caballero, JM; Frias-Beneyto, R; Villar, J; Martin-Barrasa, JL		Probiotic Properties of Alcaligenes faecalis Isolated from Argyrosomus regius in Experimental Peritonitis (Rat Model)	PROBIOTICS AND ANTIMICROBIAL PROTEINS	English	Article	Alcaligenes faecalis; Peritonitis; Probiotic; Argyrosomus regius; Rat; Escherichia coli	A strain of Alcaligenes faecalis A12C (A. faecalis A12C) isolated from Argyrosomus regius is a probiotic in fish. Previous experiments showed that A. faecalis A12C had inhibitory effects on the growth of multidrug-resistant bacteria. We aimed to confirm whether A. faecalis A12C is safe and has adequate intestinal colonization in experimental rats, and evaluate its efficacy in an animal model of p…	Fundacion Canaria de Investigacion Sanitaria, Spain [PIFUN30/18]; Ministerio de Economia y Competitividad, Spain [AGL2014-54683-R]; University of Las Palmas de Gran Canaria (PIFULPGC-2015-CCSALUD)	Fundacion Canaria de Investigacion Sanitaria, Spain; Ministerio de Economia y Competitividad, Spain; University of Las Palmas de Gran Canaria (PIFULPGC-2015-CCSALUD)	52	0	0	1	2	SPRINGER	NEW YORK	PROBIOTICS ANTIMICRO	OCT	2021	13	5	1326	1337		10.1007/s12602-021-09767-7		12	Biotechnology & Applied Microbiology; Microbiology	Science Citation Index Expanded (SCI-EXPANDED)	Biotechnology & Applied Microbiology; Microbiology	UU7FE	33713309	hybrid, Green Published	2022-05-29	WOS:000628463200001
J	Yamashita, H; Shigemori, A; Murata, M; Tanaka, H; Inagaki, N; Tsutsui, M; Kimura, M		Impact of orally-administered oligosaccharides in a murine model of food allergy	JOURNAL OF FUNCTIONAL FOODS	English	Article	Food allergy; Murine model; Raffinose; Stachyose; Tregs; B; fragilis	Food allergy is a refractory condition for which there are no standard effective therapies. Prebiotic supplementation such as oligosaccharides in infants was found to be associated with decreased risk of allergic diseases. Raffinose and stachyose are the major oligosaccharides identified in beans; these oligosaccharides have properties of regulating homeostasis. In this study, we explored the use…	JSPS [JP16K00834, JP19K07611]; Nipponham Foundation for the Future of Food	JSPS(Ministry of Education, Culture, Sports, Science and Technology, Japan (MEXT)Japan Society for the Promotion of Science); Nipponham Foundation for the Future of Food	37	1	1	11	15	ELSEVIER	AMSTERDAM	J FUNCT FOODS	OCT	2021	85				104643	10.1016/j.jff.2021.104643		8	Food Science & Technology; Nutrition & Dietetics	Science Citation Index Expanded (SCI-EXPANDED)	Food Science & Technology; Nutrition & Dietetics	UD6MH		Green Published, gold	2022-05-29	WOS:000687318900002
J	Huang, SW; Ou, YC; Tang, KS; Yu, HR; Huang, LT; Tain, YL; Lin, IC; Sheen, JM; Hou, CY; Tsai, CC; Tiao, MM		Metformin ameliorates maternal high-fat diet-induced maternal dysbiosis and fetal liver apoptosis	LIPIDS IN HEALTH AND DISEASE	English	Article	Fatty liver; High-fat diet; Pregnancy; Metformin; Microbiota; Apoptosis	Background The deleterious effect of maternal high-fat diet (HFD) on the fetal rat liver may cause later development of non-alcoholic fatty liver disease (NAFLD). The aim of this study was to evaluate the effect of maternal HFD-induced maternal hepatic steatosis and dysbiosis on the fetal liver and intestines, and the effect of prenatal metformin in a rat model. Methods Sprague-Dawley rats were a…	Chang Gung Memorial Hospital, Taiwan [CMRPG8H1301, CMRPG8J0881, CMRP G8J0882, CMRPG8J0661]	Chang Gung Memorial Hospital, Taiwan(Chang Gung Memorial Hospital)	48	0	0	1	1	BMC	LONDON	LIPIDS HEALTH DIS	2022-09-08	2021	20	1			100	10.1186/s12944-021-01521-w		16	Biochemistry & Molecular Biology; Nutrition & Dietetics	Science Citation Index Expanded (SCI-EXPANDED)	Biochemistry & Molecular Biology; Nutrition & Dietetics	UQ0ED	34496884	Green Published, gold	2022-05-29	WOS:000695744700001
J	Long, XX; Liu, D; Gao, QM; Ni, JC; Qian, LL; Ni, YQ; Fang, QC; Jia, WP; Li, HT		Bifidobacterium adolescentis Alleviates Liver Steatosis and Steatohepatitis by Increasing Fibroblast Growth Factor 21 Sensitivity	FRONTIERS IN ENDOCRINOLOGY	English	Article	NAFLD; NASH; B; adolescentis; FGF21; FGF21 sensitivity	The gut microbiota is a newly identified contributor to the development of non-alcoholic fatty liver disease (NAFLD). Previous studies of Bifidobacterium adolescentis (B. adolescentis), a species of Bifidobacterium that is common in the human intestinal tract, have demonstrated that it can alleviate liver steatosis and steatohepatitis. Fibroblast growth factor 21 (FGF21) has long been considered …	NSFC [82022012, 81870598]; Two Hundred Program from Shanghai Jiao Tong University School of Medicine [20191830]; National Natural Science Foundation of China (NSFC) [81220108006]; NSFC-NHMRC joint research grant [81561128016]; Shanghai Municipal Key Clinical Specialty; National Key Research and Development Program of China [2018YFA0800402]	NSFC(National Natural Science Foundation of China (NSFC)); Two Hundred Program from Shanghai Jiao Tong University School of Medicine; National Natural Science Foundation of China (NSFC)(National Natural Science Foundation of China (NSFC)); NSFC-NHMRC joint research grant; Shanghai Municipal Key Clinical Specialty; National Key Research and Development Program of China	45	1	1	4	4	FRONTIERS MEDIA SA	LAUSANNE	FRONT ENDOCRINOL	2022-12-30	2021	12				773340	10.3389/fendo.2021.773340		12	Endocrinology & Metabolism	Science Citation Index Expanded (SCI-EXPANDED)	Endocrinology & Metabolism	YL1PN	35035378	Green Published, gold	2022-05-29	WOS:000745671200001
J	Chen, LL; Wang, JY; Yi, J; Liu, YJ; Yu, Z; Chen, SJ; Liu, XW		Increased mucin-degrading bacteria by high protein diet leads to thinner mucus layer and aggravates experimental colitis	JOURNAL OF GASTROENTEROLOGY AND HEPATOLOGY	English	Article	dextran sulfate sodium-induced colitis; high protein diet; mucin-degrading bacteria; mucus layer; sialidase	Background and Aim Westernized high-fat diet increases the risk for inflammatory bowel diseases (IBDs), yet with insufficient understanding of the role of high-protein diet. We aimed to identify the effect of high-protein diets from different dietary proteins (casein, whey protein, soy protein) on experimental colitis and its impact on microbiota, structure and function of colonic mucus layer. Me…	National Natural Science Foundation of China [81770584, 81700464, 82000502]; Natural Science Foundation of Hunan Province [2018JJ3841]	National Natural Science Foundation of China(National Natural Science Foundation of China (NSFC)); Natural Science Foundation of Hunan Province(Natural Science Foundation of Hunan Province)	36	2	2	2	8	WILEY	HOBOKEN	J GASTROEN HEPATOL	OCT	2021	36	10	2864	2874		10.1111/jgh.15562		11	Gastroenterology & Hepatology	Science Citation Index Expanded (SCI-EXPANDED)	Gastroenterology & Hepatology	WD1OB	34050560		2022-05-29	WOS:000662055900001
J	Yang, Y; Hu, N; Gao, XJ; Li, T; Yan, ZX; Wang, PP; Wei, B; Li, S; Zhang, ZJ; Li, SL; Yan, R		Dextran sulfate sodium-induced colitis and ginseng intervention altered oral pharmacokinetics of cyclosporine A in rats	JOURNAL OF ETHNOPHARMACOLOGY	English	Article	Experimental colitis; Ginseng; Cyclosporine A; Oral pharmacokinetics; Tight junction; Gut microbiota	Ethnopharmacological relevance: Application of cyclosporine A (CsA) as a rescue treatment in acute severe ulcerative colitis (UC) is limited by its narrow therapeutic window and great interpatient variability. As a substrate of cytochrome P450 3A enzyme (CYP3A) and P-glycoprotein (P-gp), the oral pharmacokinetics of CsA is susceptible to disease status and concomitant medications. Combined treatm…	National Natural Science Foundation [81473281]; Science and Technology Development fund of Macao SAR [029/2015/A1, 043/2011/A2]; University of Macau [MYRG2015-00220-ICMS-QRCM, MYRG2015-00207-ICMS-QRCM]	National Natural Science Foundation(National Natural Science Foundation of China (NSFC)); Science and Technology Development fund of Macao SAR; University of Macau	64	4	4	4	56	ELSEVIER IRELAND LTD	CLARE	J ETHNOPHARMACOL	2022-01-30	2021	265				113251	10.1016/j.jep.2020.113251		13	Plant Sciences; Chemistry, Medicinal; Integrative & Complementary Medicine; Pharmacology & Pharmacy	Science Citation Index Expanded (SCI-EXPANDED)	Plant Sciences; Pharmacology & Pharmacy; Integrative & Complementary Medicine	OI4YS	32810615		2022-05-29	WOS:000583286600015
J	Zhang, XF; Monnoye, M; Mariadassou, M; Beguet-Crespel, F; Lapaque, N; Heberden, C; Douard, V		Glucose but Not Fructose Alters the Intestinal Paracellular Permeability in Association With Gut Inflammation and Dysbiosis in Mice	FRONTIERS IN IMMUNOLOGY	English	Article	glucose; fructose; Caco-2; Desulfovibrio; paracellular permeability; pro-inflammatory cytokines	A causal correlation between the metabolic disorders associated with sugar intake and disruption of the gastrointestinal (GI) homeostasis has been suggested, but the underlying mechanisms remain unclear. To unravel these mechanisms, we investigated the effect of physiological amounts of fructose and glucose on barrier functions and inflammatory status in various regions of the GI tract and on the…	Institut Benjamin Delessert; China Scholarship Council (CSC); INRAE	Institut Benjamin Delessert; China Scholarship Council (CSC)(China Scholarship Council); INRAE	105	0	0	11	11	FRONTIERS MEDIA SA	LAUSANNE	FRONT IMMUNOL	2022-12-27	2021	12				742584	10.3389/fimmu.2021.742584		17	Immunology	Science Citation Index Expanded (SCI-EXPANDED)	Immunology	YE0YK	35024040	Green Published, gold	2022-05-29	WOS:000740857800001
J	Javaudin, F; Bemer, P; Batard, E; Montassier, E		Impact of Phage Therapy on Multidrug-Resistant Escherichia coli Intestinal Carriage in a Murine Model	MICROORGANISMS	English	Article	phage therapy; extended-spectrum beta-lactamase; drug resistance; multidrug-resistant bacteria; intestinal carriage; enterobacteriaceae; Escherichia coli	Introduction: The growing resistance of bacteria to antibiotics is a major global public health concern. An important reservoir of this resistance is the gut microbiota. However, limited data are available on the ability of phage therapy to reduce the digestive carriage of multidrug-resistant bacteria. Materials and methods: Four novel lytic phages were isolated in vitro for efficacy against an e…			42	1	1	0	0	MDPI	BASEL	MICROORGANISMS	DEC	2021	9	12			2580	10.3390/microorganisms9122580		10	Microbiology	Science Citation Index Expanded (SCI-EXPANDED)	Microbiology	XW3OF	34946183	Green Published, gold	2022-05-29	WOS:000735532200001
J	Mustafa, A; Bai, SP; Zeng, QF; Ding, XM; Wang, JP; Xuan, Y; Su, ZW; Zhang, KY		Effect of organic acids on growth performance, intestinal morphology, and immunity of broiler chickens with and without coccidial challenge	AMB EXPRESS	English	Article	Organic acids; SCFA; Acidifiers; Coccidial challenge; Intestinal characteristics; Microbiota; Broilers	A total of 360-day-old broiler chicks were allocated into six groups in 2 (Coccidial challenge or not) x 3 (dietary treatments) factorial design. Three dietary treatments including: basic diet, basic diet plus organic acids (OAs) in drinking water, and basic diet plus OAs in the feed with and without coccidial challenge. The OAs in water or feed improved (P < 0.01) average body weight (ABW), aver…	Sichuan Provincial Science and Technology Project [2016NZ0003]; Nutreco RD. project	Sichuan Provincial Science and Technology Project; Nutreco RD. project	86	1	1	5	5	SPRINGER	NEW YORK	AMB EXPRESS	2022-10-20	2021	11	1			140	10.1186/s13568-021-01299-1		18	Biotechnology & Applied Microbiology	Science Citation Index Expanded (SCI-EXPANDED)	Biotechnology & Applied Microbiology	WJ9EV	34669066	Green Published, gold	2022-05-29	WOS:000709340500003
J	Singh, M; George, AK; Eyob, W; Homme, RP; Stansic, D; Tyagi, SC		High-methionine diet in skeletal muscle remodeling: epigenetic mechanism of homocysteine-mediated growth retardation	CANADIAN JOURNAL OF PHYSIOLOGY AND PHARMACOLOGY	English	Article	dysbiosis; phosphatidylethanolamine N-methyltransferase; trimethylamine oxide; 1-carbon metabolism; cystathionine beta-synthase	Epigenetic DNA methylation (1-carbon metabolism) is crucial for gene imprinting/off-printing that ensures epigenetic memory but also generates a copious amount of homocysteine (Hcy), unequivocally. That is why during pregnancy, expectant mothers are recommended folic acid preemptively to avoid birth defects in the young ones because of elevated Hcy levels (i.e., hyperhomocysteinemia (HHcy)). As w…	NIH [HL139047, AR-71789, DK116591]	NIH(United States Department of Health & Human ServicesNational Institutes of Health (NIH) - USA)	28	2	2	7	13	CANADIAN SCIENCE PUBLISHING	OTTAWA	CAN J PHYSIOL PHARM	JAN	2021	99	1	56	63		10.1139/cjpp-2020-0093		8	Pharmacology & Pharmacy; Physiology	Science Citation Index Expanded (SCI-EXPANDED)	Pharmacology & Pharmacy; Physiology	QA2AF	32799662		2022-05-29	WOS:000613249900008
J	Pham, VT; Ahn, J; Kim, J; Lee, S; Lee, I; Kim, S; Chang, S; Chung, W		Volatile Fatty Acid Production from Food Waste Leachate Using Enriched Bacterial Culture and Soil Bacteria as Co-Digester	SUSTAINABILITY	English	Article	volatile fatty acid (VFA); anaerobic fermentation (AF); food waste leachate (FWL); food waste (FW); soil microbes; microbiology in waste treatment	The production of volatile fatty acids (VFAs) from waste stream has been recently getting attention as a cost-effective and environmentally friendly approach in mechanical-biological treatment plants. This is the first study to explore the use of a functional bacterium, AM5 isolated from forest soil, which is capable of enhancing the production of VFAs in the presence of soil bacteria as a co-dig…	Korea Environment Industry & Technology Institute (KEITI) through Project for developing innovative drinking water and wastewater technologies - Korea Ministry of Environment (MOE) [2021002690003]	Korea Environment Industry & Technology Institute (KEITI) through Project for developing innovative drinking water and wastewater technologies - Korea Ministry of Environment (MOE)	69	2	2	6	10	MDPI	BASEL	SUSTAINABILITY-BASEL	SEP	2021	13	17			9606	10.3390/su13179606		14	Green & Sustainable Science & Technology; Environmental Sciences; Environmental Studies	Science Citation Index Expanded (SCI-EXPANDED); Social Science Citation Index (SSCI)	Science & Technology - Other Topics; Environmental Sciences & Ecology	UO3AQ		gold, Green Published	2022-05-29	WOS:000694570800001
J	Cao, HH; Yan, YH; Wang, L; Dong, LX; Pang, XL; Tang, SN; Li, AJ; Xiang, AL; Zhang, LT; Zheng, BQ		High-Throughput Sequencing Reveals Bacterial Diversity in Raw Milk Production Environment and Production Chain in Tangshan City of China	FOOD SCIENCE OF ANIMAL RESOURCES	English	Article	high-throughput nucleotide sequencing; microbial community composition; environmental microbiology	Raw milk is a nature media of microbiota that access milk from various sources, which constitutes a challenge in dairy production. This study characterizes the relationship between the raw milk quality and the bacteria diversity at different sampling sites in dairy farms, aiming to provide a strong scientific basis for good hygienic practices and optimized procedure in milk production. High-throu…	Hebei Provincial System Innovation Initiative of Modern Agriculture Technology, Phase II (HeBei Province) [HBCT2018120207]; Hebei Provincial Special Funds for Key Innovative Projects and of Dairy Industry Renaissance (HeBei Province) [19227516D]; Hebei Provincial High-Caliber Talent Award for Key Innovative Projects and of Dairy Industry Renaissance (HeBei Province) [A201803034]; Tangshan Municip…	Hebei Provincial System Innovation Initiative of Modern Agriculture Technology, Phase II (HeBei Province); Hebei Provincial Special Funds for Key Innovative Projects and of Dairy Industry Renaissance (HeBei Province); Hebei Provincial High-Caliber Talent Award for Key Innovative Projects and of Dairy Industry Renaissance (HeBei Province); Tangshan Municipal Funds for Science and Technology (Tangs…	31	2	2	9	14	KOREAN SOC FOOD SCIENCE ANIMAL RESOURCES	SEOUL	FOOD SCI ANIM RESOUR		2021	41	3	452	467		10.5851/kosfa.2021.e10		16	Food Science & Technology	Science Citation Index Expanded (SCI-EXPANDED)	Food Science & Technology	SE9BA	34017954	gold, Green Published	2022-05-29	WOS:000652361400008
J	Park, HS; Han, JH; Park, JW; Lee, DH; Jang, KW; Lee, M; Heo, KS; Myung, CS		Sodium propionate exerts anticancer effect in mice bearing breast cancer cell xenograft by regulating JAK2/STAT3/ROS/p38 MAPK signaling	ACTA PHARMACOLOGICA SINICA	English	Article	sodium propionate; breast cancer; JAK2; STAT3; ROS; p38 MAPK	Propionate is a short-chain fatty acid (SCFA) mainly produced from carbohydrates by gut microbiota. Sodium propionate (SP) has shown to suppress the invasion in G protein-coupled receptor 41 (GPR41) and GPR43-overexpressing breast cancer cells. In this study we investigated the effects of SP on the proliferation, apoptosis, autophagy, and antioxidant production of breast cancer cells. We showed t…	National Research Foundation of Korea (KRF) - Ministry of Science and ICT [NRF-2018R1A2A2A05023578]	National Research Foundation of Korea (KRF) - Ministry of Science and ICT	45	1	1	1	15	NATURE PUBLISHING GROUP	LONDON	ACTA PHARMACOL SIN	AUG	2021	42	8	1311	1323		10.1038/s41401-020-00522-2		13	Chemistry, Multidisciplinary; Pharmacology & Pharmacy	Science Citation Index Expanded (SCI-EXPANDED)	Chemistry; Pharmacology & Pharmacy	TJ2RT	32973326		2022-05-29	WOS:000572610000001
J	Martinez, Y; Gonzalez, A; Botello, A; Perez, K		Effect of a Combination of Propionic-Acetic Acid on Body Weight, Relative Weight of Some Organs, Lactic Acid Bacteria and Intestinal pH of Neonatal Broilers	BRAZILIAN JOURNAL OF POULTRY SCIENCE	English	Article	Broiler; organic acid; cecal beneficial bacteria; digestive and immune organ; intestinal pH	This study was designed to determine the effect of a combination of propionic-acetic acid on body weight, the relative weight of some organs, lactic acid bacteria, and intestinal pH of neonatal broilers. A total of 60 1-day-old Ross 308 (R) broiler chickens were randomly placed in metabolic cages to two treatments, three replicates, and ten birds per replicates. The treatments consisted of a cont…			47	3	3	3	4	FACTA-FUNDACIO ARNCO CIENCIA TECNOLOGIA AVICOLAS	CAMPINAS	BRAZ J POULTRY SCI		2021	23	2			eRBCA-2020-1252	10.1590/1806-9061-2020-1252		8	Agriculture, Dairy & Animal Science	Science Citation Index Expanded (SCI-EXPANDED)	Agriculture	RM0DU		gold	2022-05-29	WOS:000639333600001
J	Ruiz, MJ; Zbrun, MV; Signorini, ML; Zimmermann, JA; Soto, LP; Rosmini, MR; Frizzo, LS		In vitro screening and in vivo colonization pilot model of Lactobacillus plantarum LP5 and Campylobacter coli DSPV 458 in mice	ARCHIVES OF MICROBIOLOGY	English	Article	Lactic acid bacteria; Food-borne pathogen; Pathogen challenge; Antibiotic alternative; Inhibition assays	The objective of this work was to determine the antibacterial effect of Lactobacillus plantarum strains of pork origin against Campylobacter coli strains, and to conduct experimental colonization pilot models in mice for both microorganisms. Inhibition assays allowed evaluation and selection of L. plantarum LP5 as the strain with the highest antagonistic activity against C. coli and with the best…	CONICET [PUE 058]; National Agency for Scientific and Technological Promotion [PICT 2016-3495]; Universidad Nacional del Litoral [CAI+D 50120150100152LI, CAI+D 50120150100151LI, CAI+D Orientado 2016 2-14]	CONICET(Consejo Nacional de Investigaciones Cientificas y Tecnicas (CONICET)); National Agency for Scientific and Technological Promotion(ANPCyT); Universidad Nacional del Litoral	39	1	1	2	4	SPRINGER	NEW YORK	ARCH MICROBIOL	SEP	2021	203	7	4161	4171		10.1007/s00203-021-02385-5		11	Microbiology	Science Citation Index Expanded (SCI-EXPANDED)	Microbiology	UA8QY	34061232		2022-05-29	WOS:000656781600001
J	Friscic, J; Durholz, K; Chen, X; Engdahl, C; Moller, L; Schett, G; Zaiss, MM; Hoffmann, MH		Dietary Derived Propionate Regulates Pathogenic Fibroblast Function and Ameliorates Experimental Arthritis and Inflammatory Tissue Priming	NUTRIENTS	English	Article	arthritis; inflammatory tissue priming; propionate; diet; synovial fibroblasts; cellular senescence	Short-chain fatty acids are gut-bacteria-derived metabolites that execute important regulatory functions on adaptive immune responses, yet their influence on inflammation driven by innate immunity remains understudied. Here, we show that propionate treatment in drinking water or upon local application into the joint reduced experimental arthritis and lowered inflammatory tissue priming mediated b…	German Research foundation [08, DFG-FG 2886, 01, B07, CRC1181]	German Research foundation(German Research Foundation (DFG))	42	3	3	2	3	MDPI	BASEL	NUTRIENTS	MAY	2021	13	5			1643	10.3390/nu13051643		11	Nutrition & Dietetics	Science Citation Index Expanded (SCI-EXPANDED)	Nutrition & Dietetics	ST4UY	34068191	Green Published, gold	2022-05-29	WOS:000662441700001
J	Yan, LJ; Hermans, SM; Totsche, KU; Lehmann, R; Herrmann, M; Kusel, K		Groundwater bacterial communities evolve over time in response to recharge	WATER RESEARCH	English	Article	Subsurface microbial ecology; Groundwater; Temporal autocorrelation; Temporal patterns; Fractured rock	Time series analyses are a crucial tool for uncovering the patterns and processes shaping microbial communities and their functions, especially in aquatic ecosystems. Subsurface aquatic environments are perceived to be more stable than surface oceans and lakes, due to the lack of sunlight, the absence of photosysnthetically-driven primary production, low temperature variations, and oligotrophic c…	Deutsche Forschungsgemeinschaft (DFG) [390713860, FZT118, 218627073]; Thuringer Ministerium fur Wirtschaft, Wissenschaft und Digitale Gesellschaft (TMWWDG) [2016 FGI 0024]	Deutsche Forschungsgemeinschaft (DFG)(German Research Foundation (DFG)); Thuringer Ministerium fur Wirtschaft, Wissenschaft und Digitale Gesellschaft (TMWWDG)	58	5	5	11	24	PERGAMON-ELSEVIER SCIENCE LTD	OXFORD	WATER RES	2022-08-01	2021	201				117290	10.1016/j.watres.2021.117290		10	Engineering, Environmental; Environmental Sciences; Water Resources	Science Citation Index Expanded (SCI-EXPANDED)	Engineering; Environmental Sciences & Ecology; Water Resources	TV4SM	34130083	hybrid	2022-05-29	WOS:000681713800005
J	Guerra, P; Bauer, A; Reiss, RA; McCord, J		In Situ Bioremediation of a Chlorinated Hydrocarbon Plume: A Superfund Site Field Pilot Test	APPLIED SCIENCES-BASEL	English	Article	superfund; bioremediation; enhanced reductive dechlorination (ERD); dense nonaqueous-phase liquid (DNAPL); chlorinated hydrocarbons; tetrachloroethene (PCE); trichloroethene (TCE); dichloroethene (DCE); anaerobic reduction; metagenomics	The North Railroad Avenue Plume, discovered in 1989, contained chlorinated solvent groundwater plumes extending over 23.5 hectares (58 acres) and three hydrostratigraphic units. The source contaminant, tetrachloroethene, stemmed from release at a dry cleaner/laundromat business. The anaerobic biodegradation byproducts trichloroethene, isomers of dichloroethene (DCE), and vinyl chloride were detec…	US EPA Superfund Program: North Railroad Avenue Plume (USEPA) [NMD986670156]	US EPA Superfund Program: North Railroad Avenue Plume (USEPA)	29	0	0	9	9	MDPI	BASEL	APPL SCI-BASEL	NOV	2021	11	21			10005	10.3390/app112110005		23	Chemistry, Multidisciplinary; Engineering, Multidisciplinary; Materials Science, Multidisciplinary; Physics, Applied	Science Citation Index Expanded (SCI-EXPANDED)	Chemistry; Engineering; Materials Science; Physics	XA2BK		gold	2022-05-29	WOS:000720459100001
J	Duffner, C; Wunderlich, A; Schloter, M; Schulz, S; Einsiedl, F		Strategies to Overcome Intermediate Accumulation During in situ Nitrate Remediation in Groundwater by Hydrogenotrophic Denitrification	FRONTIERS IN MICROBIOLOGY	English	Article	nitrate pollution; hydrogen-oxidizing denitrification; nitrite accumulation; bioremediation; abiotic nitrite reduction	Bioremediation of polluted groundwater is one of the most difficult actions in environmental science. Nonetheless, the clean-up of nitrate polluted groundwater may become increasingly important as nitrate concentrations frequently exceed the EU drinking water limit of 50 mg L-1, largely due to intensification of agriculture and food production. Denitrifiers are natural catalysts that can reduce i…	Deutsche Forschungsgemeinschaft (DFG) through TUM International Graduate School of Science and Engineering (IGSSE) [GSC 81]	Deutsche Forschungsgemeinschaft (DFG) through TUM International Graduate School of Science and Engineering (IGSSE)(German Research Foundation (DFG))	63	2	2	4	8	FRONTIERS MEDIA SA	LAUSANNE	FRONT MICROBIOL	2022-03-04	2021	12				610437	10.3389/fmicb.2021.610437		8	Microbiology	Science Citation Index Expanded (SCI-EXPANDED)	Microbiology	QY3VW	33763037	gold, Green Published	2022-05-29	WOS:000629972200001
J	Praxedes-Campagnoni, I; Vecchi, B; Gumina, E; Hernandez-Velasco, X; Hall, JW; Layton, S		Assessment of Novel Water Applied Prebiotic to Evaluate Gut Barrier Failure and Performance in Two Commercial Trials in Brazil. A Pilot Study With an Economic Perspective	FRONTIERS IN VETERINARY SCIENCE	English	Article	prebiotic; broiler chicken; immunomodulator; intestinal integrity; performance	The present study evaluated the effect of administration of a water applied prebiotic on gut barrier failure (Experiment 1) and performance in broiler chickens under commercial conditions (Experiment 2). Experiment 1, one thousand four hundred and forty day-of-hatch Ross broiler chickens were assigned to one of two experimental groups (n = 30 replicate pens/treatment; n = 24 chicks/pen). Birds in…	BV Science	BV Science	49	1	1	4	5	FRONTIERS MEDIA SA	LAUSANNE	FRONT VET SCI	2022-06-08	2021	8				652730	10.3389/fvets.2021.652730		8	Veterinary Sciences	Science Citation Index Expanded (SCI-EXPANDED)	Veterinary Sciences	SV8GI	34169104	gold, Green Published	2022-05-29	WOS:000664055700001
J	Gupta, S; Aga, D; Pruden, A; Zhang, LQ; Vikesland, P		Data Analytics for Environmental Science and Engineering Research	ENVIRONMENTAL SCIENCE & TECHNOLOGY	English	Article	environmental science and engineering data analytics; machine learning; metagenomics; nontarget analysis; anomaly detection; water	The advent of new data acquisition and handling techniques has opened the door to alternative and more comprehensive approaches to environmental monitoring that will improve our capacity to understand and manage environmental systems. Researchers have recently begun using machine learning (ML) techniques to analyze complex environmental systems and their associated data. Herein, we provide an ove…	National Science Foundation (NSF) [1545756, 1542100, 2004751]; Center for Science and Engineering of the Exposome at the Virginia Tech Institute for Critical Technology and Applied Science (ICTAS); Virginia Tech Graduate School	National Science Foundation (NSF)(National Science Foundation (NSF)); Center for Science and Engineering of the Exposome at the Virginia Tech Institute for Critical Technology and Applied Science (ICTAS); Virginia Tech Graduate School	122	3	3	48	104	AMER CHEMICAL SOC	WASHINGTON	ENVIRON SCI TECHNOL	2022-08-17	2021	55	16	10895	10907		10.1021/acs.est.1c01026		13	Engineering, Environmental; Environmental Sciences	Science Citation Index Expanded (SCI-EXPANDED)	Engineering; Environmental Sciences & Ecology	UD2SX	34338518		2022-05-29	WOS:000687063400001
J	Drummond, SE; Burns, DP; O'Connor, KM; Clarke, G; O'Halloran, KD		The role of NADPH oxidase in chronic intermittent hypoxia-induced respiratory plasticity in adult male mice	RESPIRATORY PHYSIOLOGY & NEUROBIOLOGY	English	Article	Apnoea; Apocynin; Breathing; Chronic intermittent hypoxia; NADPH oxidase	Reactive oxygen species (ROS) are proposed as mediators of chronic intermittent hypoxia (CIH)-induced respiratory plasticity. We sought to determine if NADPH oxidase 2 (NOX2)-derived ROS underpin CIH-induced maladaptive changes in respiratory control. Adult male mice (C57BL/6 J) were assigned to one of three groups: normoxic controls (sham); chronic intermittent hypoxia-exposed (CIH, 12 cycles/ho…	Department of Physiology, UCC	Department of Physiology, UCC	86	0	0	0	0	ELSEVIER	AMSTERDAM	RESP PHYSIOL NEUROBI	OCT	2021	292				103713	10.1016/j.resp.2021.103713		14	Physiology; Respiratory System	Science Citation Index Expanded (SCI-EXPANDED)	Physiology; Respiratory System	TQ6YL	34116239	hybrid	2022-05-29	WOS:000678426300009
[truncated: 818 more rows]

## Sheet: refined_selection
Publication Type	Authors	Book Editors	Article Title	Source Title	Language	Document Type	Author Keywords	Abstract	national Science Foundation of China [41907356]; Program for Professor of Special Appointment (Eastern Scholar) [TP2019020]; Shanghai Pujiang Talent Program [19PJ1402600]; Fundamental Research Funds for the Central Universities	Funding Name Preferred	Cited Reference Count	Times Cited, WoS Core	Times Cited, All Databases	180 Day Usage Count	Since 2013 Usage Count	Publisher	Publisher City	Journal Abbreviation	Publication Date	Publication Year	Volume	Issue	Start Page	End Page	Article Number	DOI	Book DOI	Number of Pages	WoS Categories	Web of Science Index	Research Areas	IDS Number	Pubmed Id	Open Access Designations	Date of Export	UT (Unique WOS ID)
[truncated: 213 more rows]
